# Supplementary material for: Reactivity of epoxy-ynamides with metal halides: nucleophile (Br/Cl/OH)-assisted tandem intramolecular 5-exo-digor 6-endo-digcyclisation and AgF2-promoted oxidation
Source: Royal Society of Chemistry journal article supplement (doi:10.1039/c9qo00027e), 2019-01-01
Supplement: c9qo00027e1.pdf [file c9qo00027e1.pdf]

## Supporting information

**Reactivity of epoxy-ynamides with metal halides: Nucleophile (Br/Cl/OH) assisted tandem intramolecular 5-*exo-dig* and 6-*endo-dig* cyclisation and AgF<sub>2</sub> promoted oxidation**

Mandala Anitha, Mallepalli Shankar and K. C. Kumara Swamy\*

*School of Chemistry, University of Hyderabad,*

*Hyderabad -500046, Telangana, India.*

E-mail: kckssc@uohyd.ac.in, kckssc@yahoo.com

|    | <b>Contents</b>                                                             | <b>Page No.</b> |
|----|-----------------------------------------------------------------------------|-----------------|
| 1  | General methods                                                             | S2              |
| 2  | Synthesis of epoxy ynamides <b>1a-o</b>                                     | S2-S6           |
| 3  | Synthesis of 1,3 oxazolidines <b>3-11</b> from epoxy ynamides               | S6-S11          |
| 4  | Synthesis of compound <b>12</b>                                             | S11-S12         |
| 5  | Synthesis of chloromethyl-1,4-oxazines <b>13-20</b> from epoxy ynamides     | S12-S17         |
| 6  | Synthesis of hydroxymethyl-1,4-oxazines <b>21-26</b> from epoxy ynamides    | S17-S20         |
| 7  | Synthesis of 3,5-dimethylphenoxy-1,4-oxazine <b>27</b>                      | S20-S21         |
| 8  | Synthesis of 1,2-dioxo-amides <b>28-31</b> and <b>33</b>                    | S21-S23         |
| 9  | Synthesis of ynamide <b>34</b> and 1,2-dibromo enamide <b>35</b>            | S23-S24         |
| 10 | X-ray data and crystal structures of <b>4, 8, 19, 22, 30,</b> and <b>35</b> | S25-S27         |
| 11 | References                                                                  | S28             |
| 12 | <sup>1</sup> H/ <sup>13</sup> C NMR spectra (Figures S7-S86)                | S29-S68         |

**(1) General methods:** All chemicals were procured from Aldrich or local manufacturers and used further without any purification, unless noted otherwise. Chemicals and solvents were purified when required according to standard procedures.<sup>1</sup>  $^1\text{H}$ ,  $^{13}\text{C}\{^1\text{H}\}$  and  $^{19}\text{F}$  NMR spectra were recorded using 5 mm tubes on 400 MHz and 500 NMR spectrometer [field strengths: 400, 100 and 376 MHz for 400 MHz NMR spectrometer and 500, 125 and 470 MHz for 500 MHz NMR spectrometer respectively] in  $\text{CDCl}_3$ ,  $\text{DMSO}-\text{D}_6$  solutions (unless specified otherwise) with shifts referenced to  $\text{SiMe}_4$  ( $\delta = 0$ ). All  $J$  values are in Hz. Infrared spectra were recorded neat or by using KBr pellets on a FT/IR spectrometer. Melting points were determined by using a local hot-stage melting point apparatus and are uncorrected. For TLC, glass micro slides were coated with silica-gel-GF254 (mesh size 75) and spots were identified using iodine or UV chamber as appropriate. For column chromatography, silica gel of 100-200 mesh size was used. Microanalyses were performed using a CHNS analyzer. LC-MS equipment was used to record mass spectra for isolated compounds where appropriate. LC-MS data were obtained using electrospray ionization on a C-18 column at a flow rate 0.2 mL/min using MeOH/water (90:10) as eluent. Mass spectra were recorded using HRMS (ESI-TOF analyzer) equipment. X-ray data were collected at 298 K using Mo- $\text{K}_\alpha$  ( $\lambda = 0.71073 \text{ \AA}$ ) radiation. Structures were solved and refined using standard methods.<sup>2</sup>

## **(2) Synthesis of epoxy-ynamides 1a-o**

Our research group reported the synthesis of epoxy ynamides **1a-f** and **1l** by a known protocol with slight modification.<sup>3</sup> In addition, in the current work, the new compounds **1h-l** and **1n-o** have been prepared (Scheme S1). The identities of all these substrates **1a-o** were confirmed by IR and NMR spectra. IR spectra are particularly useful in identifying these compounds because the alkyne  $\text{C}\equiv\text{C}$  group shows a strong band at  $\sim 2200 \text{ cm}^{-1}$ . In the  $^{13}\text{C}$  NMR spectra, two peaks at  $\delta \sim 80$  and  $\sim 70$  due to the presence of  $-\text{C}\equiv\text{C}-$  group are observed.

## Scheme S1: Synthesis of epoxy-ynamides 1a-o

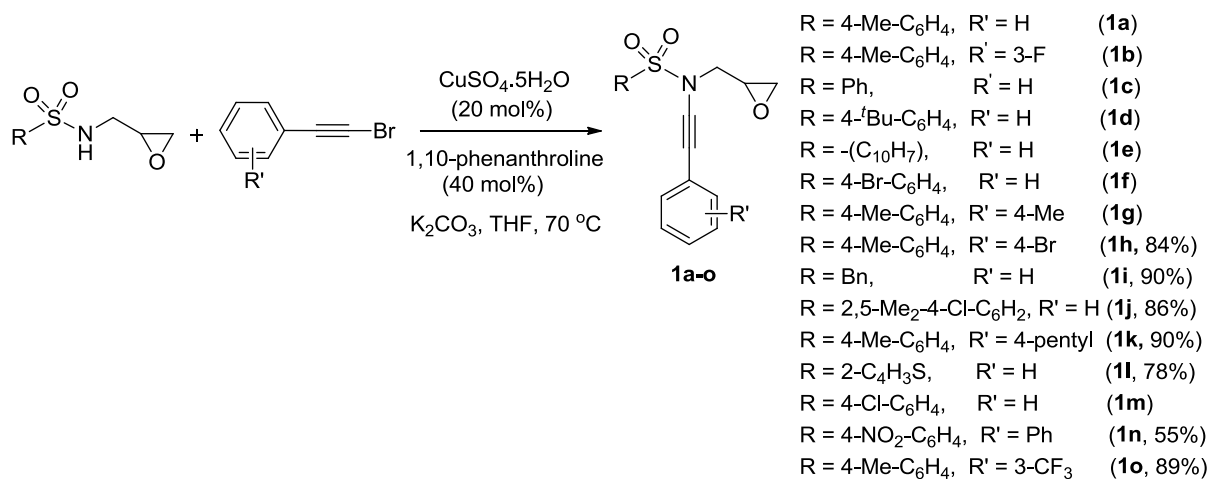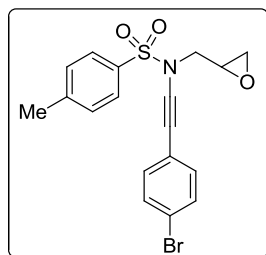

### ***N-((4-bromophenyl)ethynyl)-4-methyl-N-(oxiran-2-ylmethyl)benzenesulfonamide (1h)***

Yield: 1.50 g (84%, gummy liquid,  $R_f$  = 0.60 (9:1 hexane/ethyl acetate)); IR (neat)  $\nu_{\text{max}}$  3064, 2999, 2925, 2237, 1596, 1488, 1367, 1171, 940, 819, 711  $\text{cm}^{-1}$ ;  $^1\text{H}$  NMR (500 MHz,  $\text{CDCl}_3$ ):  $\delta$  7.87-7.86 (m, 2H), 7.46-7.43 (m, 2H), 7.39 (m, 2H), 7.25-7.22 (m, 2H), 3.62 (d,  $J$  = 5.0 Hz, 2H), 3.24-3.21 (m, 1H), 2.85-2.83 (m, 1H), 2.66-2.65 (m, 1H), 2.48 (s, 3H);  $^{13}\text{C}$  NMR (125 MHz,  $\text{CDCl}_3$ ):  $\delta$  145.1, 134.3, 132.8, 131.6, 129.9, 127.8, 122.1, 121.6, 83.4, 69.8, 53.9, 49.3, 45.5, 21.7; HRMS (ESI): Calcd for  $\text{C}_{18}\text{H}_{17}\text{BrNO}_3\text{S}$  ( $\text{M}^+ + \text{H}$ ), ( $\text{M}^+ + \text{H} + 2$ )  $m/z$  406.0112, 408.0092. Found: 406.0111, 408.0090.

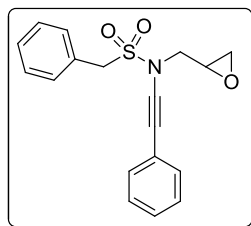

### ***N-(oxiran-2-ylmethyl)-1-phenyl-N-(phenylethynyl)methanesulfonamide (1i)***

Yield: 1.29 g (90%, gummy liquid,  $R_f$  = 0.58 (9:1 hexane/ethyl acetate)); IR (neat) $\nu_{max}$  3062, 2999, 2929, 2237, 1495, 1361, 1258, 1202, 1158, 1135, 1007, 937, 796, 695  $\text{cm}^{-1}$ ;  $^1\text{H}$  NMR (400 MHz,  $\text{CDCl}_3$ ):  $\delta$  7.53 (m, 2H), 7.42 (m, 5H), 7.36-7.34 (m, 3H), 4.64 (AB multiplet, 2H), 3.40-3.30 (m, 2H), 3.10 (m, 1H), 2.81 (m, 1H), 2.63 (m, 1H);  $^{13}\text{C}$  NMR (100 MHz,  $\text{CDCl}_3$ ):  $\delta$  131.7, 131.0, 129.4, 129.0, 128.4, 128.3, 127.7, 122.3, 81.8, 71.0, 57.5, 54.8, 49.4, 45.6; LC-MS:  $m/z$  328  $[\text{M}+1]^+$ ; Anal.Calcd. for  $\text{C}_{18}\text{H}_{17}\text{NO}_3\text{S}$ : C, 66.03; H, 5.23; N, 4.28. Found: C, 66.15; H, 5.18; N, 4.32.

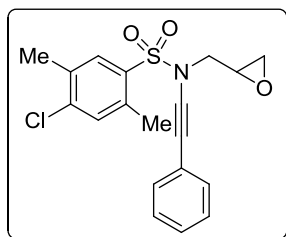

**4-chloro-2,5-dimethyl-N-(oxiran-2-ylmethyl)-N-(phenylethynyl)benzenesulfonamide (1j)** Yield: 1.21 g (86%, gummy liquid,  $R_f$  = 0.62 (9:1 hexane/ethyl acetate)); IR (neat) $\nu_{max}$  3059, 2997, 2926, 2858, 2236, 1599, 1543, 1479, 1370, 1169, 940, 755  $\text{cm}^{-1}$ ;  $^1\text{H}$  NMR (500 MHz,  $\text{CDCl}_3$ ):  $\delta$  7.92 (s, 1H), 7.36 (s, 1H), 7.34-7.29 (m, 5H), 3.72-3.68 (m, 1H), 3.64-3.60 (m, 1H), 3.32-3.28 (m, 1H), 2.87 (t,  $J$  = 4.3 Hz, 1H), 2.70 (d,  $J$  = 2.5 Hz, 1H), 2.69 (s, 3H), 2.42 (s, 3H);  $^{13}\text{C}$  NMR (125 MHz,  $\text{CDCl}_3$ ):  $\delta$  140.2, 137.3, 134.5, 134.1, 133.2, 132.8, 131.2, 128.3, 128.1, 122.4, 81.9, 71.6, 53.5, 49.3, 45.7, 20.4, 19.6; HRMS (ESI): Calcd for  $\text{C}_{19}\text{H}_{18}\text{ClNO}_3\text{SNa}$  ( $\text{M}^+ + \text{Na}$ ), ( $\text{M}^+ + \text{Na} + 2$ )  $m/z$  398.0594, 400.0564. Found: 398.0589, 400.0565.

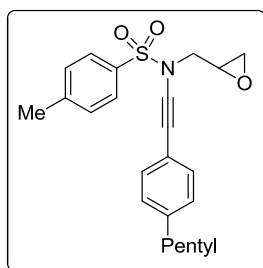

**4-methyl-N-(oxiran-2-ylmethyl)-N-((4-pentylphenyl)ethynyl)benzenesulfonamide (1k)**

Yield: 1.71 g (90%, gummy liquid,  $R_f$  = 0.68 (9:1 hexane/ethyl acetate)); IR (neat) $\nu_{max}$  2955, 2927, 2857, 2236, 1597, 1366, 1170, 1114, 841, 745  $\text{cm}^{-1}$ ;  $^1\text{H}$  NMR (500 MHz,  $\text{CDCl}_3$ ):  $\delta$  7.89-7.87 (m, 2H), 7.38-7.36 (m, 2H), 7.32-7.30 (m, 2H), 7.12 (m, 2H), 3.68-3.64 (m, 1H) and 3.58-

3.54 (m, 1H) [as AB system], 3.24-3.21 (m, 1H), 2.81 (t,  $J = 4.3$  Hz, 1H), 2.66-2.64 (m, 1H), 2.59 (t,  $J = 7.7$  Hz, 2H), 2.46 (s, 3H), 1.64-1.58 (m, 2H), 1.38-1.32 (m, 4H), 0.91 (t,  $J = 7.0$  Hz, 3H);  $^{13}\text{C}$  NMR (125 MHz,  $\text{CDCl}_3$ ):  $\delta$  144.9, 143.3, 134.4, 131.6, 129.8, 128.4, 127.8, 119.6, 81.6, 70.7, 54.0, 49.2, 45.6, 35.8, 31.4, 31.0, 22.5, 21.7, 14.0; LC-MS:  $m/z$  398  $[\text{M}+1]^+$ ; Anal.Calcd. for  $\text{C}_{23}\text{H}_{27}\text{NO}_3\text{S}$ : C, 69.49; H, 6.85; N, 3.52. Found: C, 69.36; H, 6.81; N, 3.58.

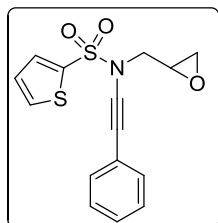

***N*-(oxiran-2-ylmethyl)-*N*-(phenylethynyl)thiophene-2-sulfonamide (1l)**

Yield: 1.136 g (78%, gummy liquid,  $R_f = 0.55$  (9:1 hexane/ethyl acetate)); IR (neat) $\nu_{\text{max}}$  3099, 3059, 3000, 2927, 2238, 1401, 1371, 1228, 1171, 1017, 856, 757  $\text{cm}^{-1}$ ;  $^1\text{H}$  NMR (500 MHz,  $\text{CDCl}_3$ ):  $\delta$  7.78-7.77 (m, 1H), 7.72-7.70 (m, 1H), 7.43-7.41 (m, 2H), 7.31-7.30 (m, 3H), 7.17-7.15 (m, 1H), 3.68-3.58 (m, 2H), 3.26-3.23 (m, 1H), 2.82 (dd $\rightarrow$ t,  $J = 4.5$  Hz, 1H), 2.66-2.65 (m, 1H);  $^{13}\text{C}$  NMR (125 MHz,  $\text{CDCl}_3$ ):  $\delta$  136.4, 134.1, 134.0, 131.5, 128.4, 128.3, 127.8, 122.3, 81.8, 71.6, 54.4, 49.2, 45.5; LC-MS:  $m/z$  320  $[\text{M}+1]^+$ ; Anal.Calcd. for  $\text{C}_{15}\text{H}_{13}\text{NO}_3\text{S}_2$ : C, 56.41; H, 4.10; N, 4.39. Found: C, 56.32; H, 4.15; N, 4.31.

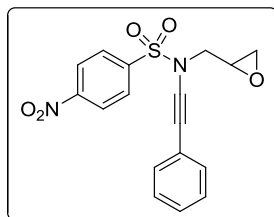

**4-nitro-*N*-(oxiran-2-ylmethyl)-*N*-(phenylethynyl)benzenesulfonamide (1n)** Yield: 0.735 g (53%, gummy liquid,  $R_f = 0.62$  (9:1 hexane/ethyl acetate)); IR (neat) $\nu_{\text{max}}$  3103, 2925, 2239, 1605, 1528, 1401, 1368, 1345, 1311, 1172, 1107, 1088, 1027, 938, 896, 810, 736, 687  $\text{cm}^{-1}$ ;  $^1\text{H}$  NMR (400 MHz,  $\text{CDCl}_3$ ):  $\delta$  8.43 (d,  $J = 8.8$  Hz, 2H), 8.20 (d,  $J = 8.8$  Hz, 2H), 7.41-7.32 (m, 5H), 3.81-3.66 (m, 2H), 3.28-3.24 (m, 1H), 2.86 (t,  $J = 4.4$  Hz, 1H), 2.69-2.67 (m, 1H);  $^{13}\text{C}$  NMR (100 MHz,  $\text{CDCl}_3$ ):  $\delta$  150.7, 142.7, 131.7, 129.2, 128.6, 128.5, 124.4, 121.7, 80.8, 71.4, 54.4, 49.1, 45.5; HRMS (ESI): Calcd for  $\text{C}_{17}\text{H}_{14}\text{N}_2\text{O}_5\text{S}$  ( $\text{M}^+ + \text{Na}$ )  $m/z$  381.0521. Found: 381.0524.

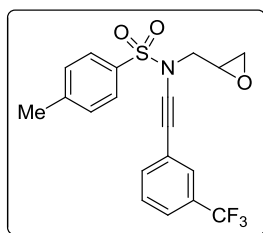

**4-methyl-N-(oxiran-2-ylmethyl)-N-((3-(trifluoromethyl)phenyl)ethynyl)benzenesulfonamide**

**(1a)** Yield: 1.47 g (85%, gummy liquid,  $R_f$  = 0.62 (9:1 hexane/ethyl acetate)); IR (neat)  $\nu_{max}$  3163, 3002, 2944, 2252, 1441, 1375, 1201, 1171, 1039, 918, 739  $\text{cm}^{-1}$ ;  $^1\text{H}$  NMR (500 MHz,  $\text{CDCl}_3$ ):  $\delta$  7.87 (d,  $J$  = 8.5 Hz, 2H), 7.60 (s, 1H), 7.55-7.54 (m, 2H), 7.45-7.39 (m, 3H), 3.69-3.59 (m, 2H), 3.26-3.23 (m, 1H), 2.85 (t,  $J$  = 4.3 Hz, 1H), 2.67-2.66 (m, 1H), 2.48 (s, 3H);  $^{13}\text{C}$  NMR (125 MHz,  $\text{CDCl}_3$ ):  $\delta$  145.3, 134.3, 130.9 (q,  $J$  = 65.0 Hz), 129.9, 128.8, 127.9 (q  $\rightarrow$  t,  $J$  = 3.7 Hz), 127.8, 124.4 (q,  $J$  = 7.7 Hz), 123.7 (q,  $J$  = 270.8 Hz), 123.6, 83.9, 69.6, 53.9, 49.3, 45.4, 21.7;  $^{19}\text{F}$  NMR (470 MHz,  $\text{CDCl}_3$ ) -62.9; HRMS (ESI): Calcd. for  $\text{C}_{19}\text{H}_{17}\text{F}_3\text{NO}_3\text{S}$  ( $\text{M}^+ + \text{H}$ ):  $m/z$  396.0881. Found: 396.0880.

**(3) Synthesis of 1,3 oxazolidines 3-11 from epoxy ynamides**

To an oven dried RBF (10 mL), 4-methyl-N-(oxiran-2-ylmethyl)-N-(phenylethynyl)benzenesulfonamide (**1a**; 0.100 g, 0.3 mmol) in dry DMF (1 mL), CuBr (0.088 g, 0.6 mmol) was added. The mixture was heated with stirring at 80  $^\circ\text{C}$  for 1-2 h. After completion of the reaction as monitored by TLC, ethyl acetate (25 mL) was added and the solution was washed with water (3 x 30 mL). The aqueous layer was extracted with ethyl acetate (3x 20 mL). The combined organic portion was dried over anhydrous  $\text{Na}_2\text{SO}_4$  and the solvent removed under reduced pressure. Purification by column chromatography (hexane/ethyl acetate 9:1) afforded 1,3-oxazolidine **3**. Compounds **4-11** were prepared following the same procedure and by using the same molar quantities.

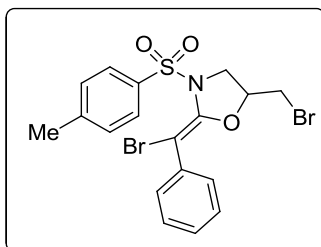

**(E)-2-(bromo(phenyl)methylene)-5-(bromomethyl)-3-tosyloxazolidine (3)**

Yield: 0.131g (88% with *E:Z* in 96:4,  $R_f = 0.78$  (9:1 hexane/ethyl acetate)); IR (neat) $\nu_{max}$  3054, 3030, 2959, 2923, 2852, 1649, 1596, 1490, 1443, 1367, 1346, 1165, 1088, 1052, 1018, 753  $\text{cm}^{-1}$ ;  $^1\text{H}$  NMR (400 MHz,  $\text{DMSO-}d_6$ ):  $\delta$  7.91 (d,  $J = 8.0$  Hz, 2H), 7.54 (m, 4H), 7.38 (dd $\rightarrow$ t,  $J \sim 7.4$  Hz, 2H), 7.29 (t,  $J \sim 7.4$  Hz, 1H), 4.24-4.20 (m, 1H), 3.97 (br m, 1H), 3.62-3.56 (m, 2H), 3.53-3.49 (m, 1H), 2.46 (s, 3H);  $^{13}\text{C}$  NMR (125 MHz,  $\text{DMSO-}d_6$ ):  $\delta$  146.4, 145.8, 136.6, 134.8, 130.7, 130.2, 129.8, 129.4, 128.6, 128.4, 128.2, 127.0, 93.6, 77.7, 51.8, 33.2, 21.6; HRMS (ESI): Calcd. for  $\text{C}_{18}\text{H}_{18}\text{Br}_2\text{NO}_3\text{S}$  ( $\text{M}^+ + \text{H}$ ), ( $\text{M}^+ + \text{H} + 2$ ), ( $\text{M}^+ + \text{H} + 4$ )  $m/z$  485.9374, 487.9354, 489.9334. Found: 485.9376, 487.9356, 489.9338.

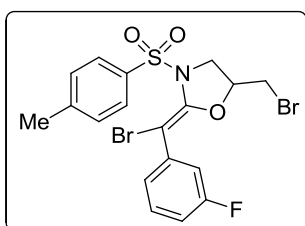

**(E)-2-(bromo(3-fluorophenyl)methylene)-5-(bromomethyl)-3-tosyloxazolidine (4)**

Yield: 0.121 g (83% with *E:Z* in 78:22,  $R_f = 0.76$  (9:1 hexane/ethyl acetate)); Mp: 118-120  $^\circ\text{C}$ ; IR (KBr) $\nu_{max}$  3068, 3033, 2958, 1648, 1608, 1582, 1487, 1434, 1348, 1265, 1165, 1088, 1054, 1019, 953, 779, 680  $\text{cm}^{-1}$ ;  $^1\text{H}$  NMR (400 MHz,  $\text{DMSO-}d_6$ ): Major isomer:  $\delta$  7.90 (d,  $J = 8.4$  Hz, 2H), 7.53 (d,  $J = 8.4$  Hz, 2H), 7.45-7.42 (m, 2H), 7.37-7.32 (m, 2H), 4.25-4.20 (m, 1H), 4.03-3.97 (m, 1H), 3.66-3.62 (m, 2H), 3.56-3.53 (m, 1H), 2.45 (s, 3H);  $^{13}\text{C}$  NMR (100 MHz,  $\text{DMSO-}d_6$ ): Major isomer:  $\delta$  162.0 (d,  $J = 241.4$  Hz), 147.3, 145.9, 138.8 (d,  $J = 8.3$  Hz), 134.7, 130.7<sub>4</sub>, 130.6<sub>8</sub>, 128.2, 127.8, 126.9 (d,  $J = 3.3$  Hz), 125.6 (d,  $J = 2.8$  Hz), 115.9 (d,  $J = 23.3$  Hz), 115.1 (d,  $J = 20.8$  Hz), 91.8, 78.1, 51.8, 33.2, 21.6;  $^{19}\text{F}$  NMR: -113.30 (major isomer); -114.06 (minor isomer); HRMS (ESI): Calcd. for  $\text{C}_{18}\text{H}_{17}\text{Br}_2\text{FNO}_3\text{S}$  ( $\text{M}^+ + \text{H}$ ), ( $\text{M}^+ + \text{H} + 2$ ), ( $\text{M}^+ + \text{H} + 4$ ):  $m/z$  503.9280, 505.9260, 507.9240. Found:

503.9281, 505.9263, 507.9250; This compound was crystallized from hexane/ethyl acetate (2:1) mixture at 25 °C. X-ray structure was determined for the *E*-isomer.

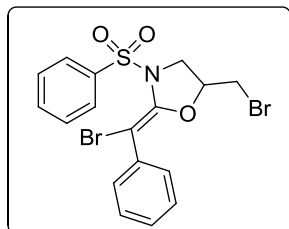

**(*E*)-2-(bromo(phenyl)methylene)-5-(bromomethyl)-3-(phenylsulfonyl)oxazolidine (5)**

Yield: 0.121g (80% with *E:Z* in 88:12,  $R_f$  = 0.66 (9:1 hexane/ethyl acetate)); IR (neat) $\nu_{max}$  3061, 2955, 2926, 2854, 1651, 1446, 1367, 1348, 1168, 1088, 1053, 1023, 754, 726, 689  $\text{cm}^{-1}$ ;  $^1\text{H}$  NMR (400 MHz,  $\text{DMSO-}D_6$ ): Major isomer:  $\delta$  8.04-8.02 (m, 2H), 7.86-7.82 (m, 1H), 7.75-7.72 (m, 2H), 7.56-7.54 (m, 2H), 7.39-7.36 (m, 2H), 7.31-7.27 (m, 1H), 4.26-4.22 (m, 1H), 4.01-3.96 (m, 1H), 3.64-3.58 (m, 2H), 3.52-3.49 (m, 1H);  $^{13}\text{C}$  NMR (100 MHz,  $\text{DMSO-}D_6$ ): Major isomer:  $\delta$  146.3, 137.8, 136.6, 135.0, 130.3, 129.4, 128.6, 128.4, 128.2, 127.7, 93.6, 77.8, 51.9, 33.1; HRMS (ESI): Calcd. for  $\text{C}_{17}\text{H}_{16}\text{Br}_2\text{NO}_3\text{S}$  ( $\text{M}^+ + \text{H}$ ), ( $\text{M}^+ + \text{H} + 2$ ), ( $\text{M}^+ + \text{H} + 4$ ):  $m/z$  471.9217, 473.9197, 475.9177. Found: 471.9218, 473.9195, 475.9178.

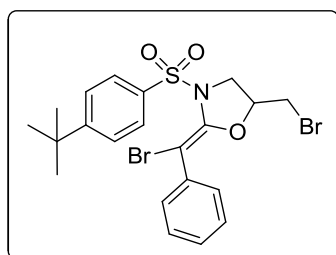

**(*E*)-2-(bromo(phenyl)methylene)-5-(bromomethyl)-3-((4-(tert-butyl)phenyl)sulfonyl)oxazolidine (6)**

Yield: 0.117 g (82% with *E:Z* in 92:8,  $R_f$  = 0.72 (9:1 hexane/ethyl acetate)); IR (neat) $\nu_{max}$  2925, 2870, 2854, 1752, 1596, 1496, 1399, 1331, 1267, 1164, 1113, 1088, 1027, 837, 753, 629  $\text{cm}^{-1}$ ;  $^1\text{H}$  NMR (400 MHz,  $\text{DMSO-}D_6$ ): Major isomer:  $\delta$  7.95 (d,  $J$  = 8.4 Hz, 2H), 7.74 (d,  $J$  = 8.4 Hz, 2H), 7.55 (d,  $J$  = 8.0 Hz, 2H), 7.38 (dd $\rightarrow$ t,  $J$   $\sim$  7.4 Hz, 2H), 7.29 (t,  $J$   $\sim$  7.4 Hz, 1H), 4.22-4.17 (m, 1H), 4.03-3.98 (m, 1H), 3.61-3.55 (m, 2H), 3.49-3.45 (m, 1H), 1.34 (s, 9H);  $^{13}\text{C}$  NMR (100 MHz,  $\text{DMSO-}$

D<sub>6</sub>): Major isomer:  $\delta$  158.4, 146.4, 136.6, 134.7, 129.5, 128.6, 128.4, 128.2, 127.1, 93.6, 78.0, 51.8, 35.6, 33.1, 31.2; HRMS (ESI): Calcd. for C<sub>21</sub>H<sub>24</sub>Br<sub>2</sub>NO<sub>3</sub>S (M<sup>+</sup>+H), (M<sup>+</sup>+H+2), (M<sup>+</sup>+H+4):  $m/z$  527.9843, 529.9823, 531.9803. Found: 527.9842, 529.9824, 531.9801.

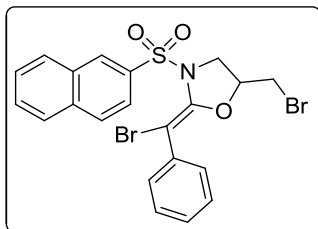

**(E)-2-(bromo(phenyl)methylene)-5-(bromomethyl)-3-(naphthalen-2-ylsulfonyl)oxazolidine (7)**

Yield: 0.112 g (78% with *E:Z* in 96: 4,  $R_f$  = 0.70 (9:1 hexane/ethyl acetate)); IR (neat) $\nu_{max}$  3058, 2923, 2853, 1748, 1591, 1504, 1455, 1444, 1336, 1260, 1157, 1131, 1073, 1027, 900, 814, 749, 659 cm<sup>-1</sup>; <sup>1</sup>H NMR (500 MHz, DMSO-D<sub>6</sub>): Major isomer:  $\delta$  8.75 (s, 1H), 8.28-8.24 (m, 2H), 8.12 (d,  $J$  = 8.0 Hz, 1H), 8.02-8.00 (m, 1H), 7.81-7.72 (m, 2H), 7.57 (d,  $J$  = 8.0 Hz, 2H), 7.37 (dd→t,  $J$  ~ 7.7 Hz, 2H), 7.28 (t,  $J$  = 7.5 Hz, 1H), 4.34-4.30 (m, 1H), 4.01-3.97 (m, 1H), 3.68-3.64 (m, 1H), 3.59-3.56 (m, 1H), 3.51-3.50 (m, 1H); <sup>13</sup>C NMR (125 MHz, DMSO-D<sub>6</sub>): Major isomer:  $\delta$  146.4, 136.6, 135.4, 134.8, 132.1, 130.4, 130.2, 130.1, 130.0, 129.5, 128.6, 128.5<sub>3</sub>, 128.4<sub>6</sub>, 128.4, 122.8, 93.6, 77.8, 52.0, 33.2; HRMS (ESI): Calcd. for C<sub>21</sub>H<sub>17</sub>Br<sub>2</sub>NO<sub>3</sub>SNa (M<sup>+</sup>+Na), (M<sup>+</sup>+Na+2), (M<sup>+</sup>+Na+4):  $m/z$  543.9194, 545.9174, 547.9154. Found: 543.9193, 545.9180, 547.9155.

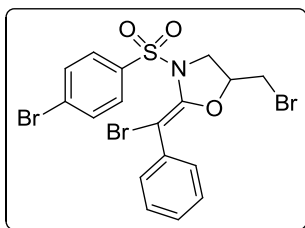

**(E)-2-(bromo(phenyl)methylene)-5-(bromomethyl)-3-((4-bromophenyl)sulfonyl)oxazolidine (8)**

Yield: 0.113 g (81% with *E:Z* in 89:11,  $R_f$  = 0.73 (9:1 hexane/ethyl acetate)); Mp: 138-140 °C; IR (KBr) $\nu_{max}$  3105, 3035, 2959, 2922, 2852, 1678, 1606, 1531, 1350, 1311, 1169, 856, 772, 739 cm<sup>-1</sup>; <sup>1</sup>H NMR (400 MHz, DMSO-D<sub>6</sub>): Major isomer:  $\delta$  7.97-7.91 (m, 4H), 7.56-7.54 (m, 2H), 7.37 (t,  $J$  = 7.7 Hz, 2H), 7.29 (t,  $J$  = 7.5 Hz, 1H), 4.27-4.23 (m, 1H), 4.11-4.06 (m, 1H), 3.66-3.62 (m, 2H), 3.56-3.53 (m, 1H); <sup>13</sup>C NMR (100 MHz, DMSO-D<sub>6</sub>): Major isomer:  $\delta$  146.1, 137.1, 136.5, 133.4, 130.1, 130.0, 129.4, 129.2, 128.6, 128.5, 93.7, 77.9, 51.9, 33.2; HRMS (ESI): Calcd. for C<sub>17</sub>H<sub>15</sub>Br<sub>3</sub>NO<sub>3</sub>S (M<sup>+</sup>+H), (M<sup>+</sup>+H+2), (M<sup>+</sup>+H+4), (M<sup>+</sup>+H+6) :  $m/z$  549.8323, 551.8303, 553.8283,

555.8263. Found: 549.8321, 551.8305, 553.8284, 555.8258. This compound was crystallized from hexane/ethyl acetate (2:1) mixture at 25 °C. X-ray structure was determined for this sample.

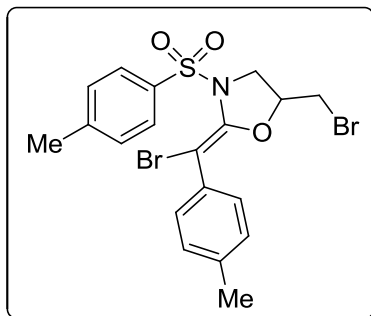

**(E)-2-(bromo(p-tolyl)methylene)-5-(bromomethyl)-3-tosyloxazolidine (9)**

Yield: 0.126 g (86% with *E:Z* in 86:14,  $R_f$  = 0.74 (9:1 hexane/ethyl acetate)); IR (neat) $\nu_{max}$  2960, 2923, 2855, 1747, 1597, 1513, 1422, 1330, 1260, 1159, 1090, 1018, 811, 752  $\text{cm}^{-1}$ ;  $^1\text{H}$  NMR (500 MHz,  $\text{DMSO-}d_6$ ): Major isomer:  $\delta$  7.88 (d,  $J$  = 8.5 Hz, 2H), 7.52 (d,  $J$  = 8.5 Hz, 2H), 7.43 (d,  $J$  = 8.0 Hz, 2H), 7.17 (d,  $J$  = 8.0 Hz, 2H), 4.21-4.17 (m, 1H), 3.93-3.90 (m, 1H), 3.59-3.53 (m, 2H), 3.50-3.47 (m, 1H), 2.44 (s, 3H), 2.30 (1s, 3H);  $^{13}\text{C}$  NMR (125 MHz,  $\text{DMSO-}d_6$ ): Major isomer:  $\delta$  146.0, 145.7, 137.9, 134.8, 133.8, 130.7, 129.3, 129.1, 128.2, 127.7, 93.9, 77.6, 51.8, 33.2, 21.6, 21.2; HRMS (ESI): Calcd. for  $\text{C}_{19}\text{H}_{20}\text{Br}_2\text{NO}_3\text{S}$  ( $\text{M}^+ + \text{H}$ ), ( $\text{M}^+ + \text{H} + 2$ ), ( $\text{M}^+ + \text{H} + 4$ ):  $m/z$  499.9530, 501.9500, 503.9480. Found: 499.9523, 501.9504, 503.9484.

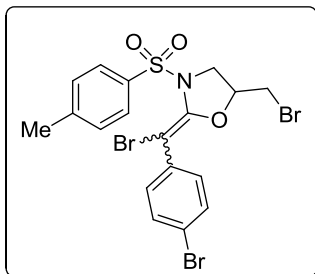

**(E/Z)-2-(bromo(4-bromophenyl)methylene)-5-(bromomethyl)-3-tosyloxazolidine (10) (two isomers)**

Yield: 0.108 g (78% with *E:Z* in 54:46,  $R_f$  = 0.76 (9:1 hexane/ethyl acetate)); IR (near) $\nu_{max}$  2956, 2925, 2854, 1748, 1657, 1596, 1488, 1338, 1163, 1090, 1011, 814, 756, 669  $\text{cm}^{-1}$ ;  $^1\text{H}$  NMR (500

MHz, DMSO- $D_6$ ): Isomer 1:  $\delta$  7.89 (d,  $J$  = 8.5 Hz, 2H), 7.53-7.48 (m, 6H), 4.23-4.19 (m, 1H), 4.00-3.94 (m, 1H), 3.59-3.56 (m, 2H), 3.52-3.49 (m, 1H), 2.44 (s, 3H). Isomer 2:  $\delta$  7.59-7.57 (m, 2H), 7.45-7.41 (m, 4H), 7.38-7.36 (m, 2H), 4.34-4.30 (m, 1H); 4.00-3.94 (m, 1H), 3.82-3.78 (m, 1H); 3.64-3.60 (m, 2H), 2.43 (s, 3H);  $^{13}\text{C}$  NMR (125 MHz, DMSO- $D_6$ ): Isomer 1:  $\delta$  146.9, 145.8, 135.9, 134.8, 132.0, 131.4, 130.7, 130.3, 128.2, 121.3, 92.1, 77.9, 51.9, 33.1, 21.6. Isomer 2: 146.5, 145.7, 137.2, 134.3, 131.5, 131.3, 130.6, 127.7, 121.0, 88.9, 76.9, 52.9, 32.8, 21.6; HRMS (ESI): Calcd. for  $\text{C}_{18}\text{H}_{17}\text{Br}_3\text{NO}_3\text{S}$  ( $\text{M}^+ + \text{H}$ ), ( $\text{M}^+ + \text{H} + 2$ ), ( $\text{M}^+ + \text{H} + 4$ ), ( $\text{M}^+ + \text{H} + 6$ ):  $m/z$  563.8479, 565.8459, 567.8439, 569.8419. Found: 563.8470, 565.8450, 567.8432, 569.8412.

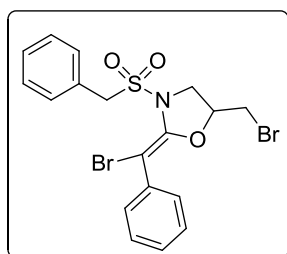

**(E)-3-(benzylsulfonyl)-2-(bromo(phenyl)methylene)-5-(bromomethyl)oxazolidine (11)**

Yield: 0.126 g (85% with *E:Z* in 94:6,  $R_f$  = 0.80 (9:1 hexane/ethyl acetate)); IR (neat)  $\nu_{max}$  2929, 1745, 1495, 1455, 1327, 1212, 1127, 1029, 830, 751, 695  $\text{cm}^{-1}$ ;  $^1\text{H}$  NMR (400 MHz,  $\text{CDCl}_3$ ):  $\delta$  7.68-7.65 (m, 2H), 7.59-7.57 (m, 2H), 7.48-7.46 (m, 3H), 7.38-7.34 (m, 2H), 7.29-7.25 (m, 1H), 4.77 (AB pattern, 2H), 4.49-4.42 (m, 1H), 3.43-3.33 (m, 3H), 3.27-3.23 (m, 1H);  $^{13}\text{C}$  NMR (100 MHz,  $\text{CDCl}_3$ ):  $\delta$  146.2, 135.9, 131.4, 129.3, 128.9, 128.1, 128.0, 127.9, 92.1, 78.1, 60.7, 52.5, 30.0; HRMS (ESI): Calcd. for  $\text{C}_{18}\text{H}_{18}\text{Br}_2\text{NO}_3\text{S}$  ( $\text{M}^+ + \text{H}$ ), ( $\text{M}^+ + \text{H} + 2$ ), ( $\text{M}^+ + \text{H} + 4$ ):  $m/z$  485.9374, 487.9354, 489.9334. Found: 485.9368, 487.9353, 489.9331.

**(4) Synthesis of compound 12**

To an oven dried 10 mL RBF, 4-methyl-*N*-(oxiran-2-ylmethyl)-*N*-phenylbenzenesulfonamide (0.1 g, 0.3 mmol) in DMF/ $\text{H}_2\text{O}$  (0.9+0.1 mL), and CuBr (0.94 g, 0.6 mmol) were added. The mixture was heated with stirring at 80  $^\circ\text{C}$  for 2 h. After completion of the reaction as monitored by TLC, ethyl acetate (25 mL) was added and the solution was washed with water (3 x 30 mL); the aqueous layer was extracted with ethyl acetate (3x 20 mL). The combined organic portion was

dried over anh. Na<sub>2</sub>SO<sub>4</sub> and the solvent removed under reduced pressure. Purification by column chromatography (hexane/ethyl acetate 9:1) afforded compound **12**.

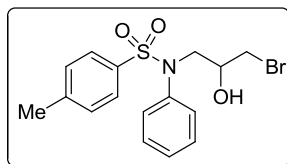

***N*-(3-bromo-2-hydroxypropyl)-4-methyl-N-phenylbenzenesulfonamide (**12**)**

Yield: 0.117 g (93%,  $R_f$  = 0.46 (9:1 hexane/ethyl acetate)); IR (neat) $\nu_{max}$  3495, 3063, 2924, 1595, 1490, 1344, 1160, 1088, 1023, 814 cm<sup>-1</sup>; <sup>1</sup>H NMR (500 MHz, CDCl<sub>3</sub>):  $\delta$  7.46 (d,  $J$  = 8.5 Hz, 2H), 7.34-7.31 (m, 3H), 7.26 (d,  $J$  = 8.0 Hz, 2H), 7.09-7.07 (m, 2H), 3.92-3.87 (m, 1H), 3.76-3.65 (m, 2H), 3.58-3.55 (m, 1H), 3.48-3.45 (m, 1H), 3.02 (d,  $J$  = 5.5 Hz, 1H), 2.43 (s, 3H); <sup>13</sup>C NMR (125 MHz, CDCl<sub>3</sub>):  $\delta$  144.0, 139.8, 134.5, 129.6, 129.3, 128.7, 128.4, 127.8, 69.0, 55.0, 36.4, 21.6; HRMS (ESI): Calcd. for C<sub>16</sub>H<sub>18</sub>BrNO<sub>3</sub>Na (M<sup>+</sup>+Na), (M<sup>+</sup>+Na+2):  $m/z$  406.0089, 408.0069. Found: 406.0089, 408.0070.

**(5) Synthesis of chloromethyl-1,4-oxazines **13-20** from epoxy ynamides**

To an oven dried 10 mL RBF, 4-methyl-*N*-(oxiran-2-ylmethyl)-*N*-(phenylethynyl)benzenesulfonamide (**1a**; 0.1 g, 0.3 mmol) in DMF/H<sub>2</sub>O(0.9+0.1 mL), anhy. LiCl (0.024 g, 0.6 mmol) was added. The mixture was heated with stirring at 80 °C for 12 h. After completion of the reaction as monitored by TLC, ethyl acetate (25 mL) was added and the solution was washed with water (3 x 30 mL); the aqueous layer was extracted with ethyl acetate (3x 20 mL). The combined organic portion was dried over anh. Na<sub>2</sub>SO<sub>4</sub> and the solvent removed under reduced pressure. Purification by column chromatography (hexane/ethyl acetate 9:1) afforded compound 1,4-oxazine **13**. Compounds **13'** and **14-20** were prepared following the same procedure and by using the same molar quantities.

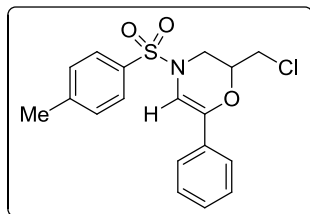

**2-(chloromethyl)-6-phenyl-4-tosyl-3,4-dihydro-2H-1,4-oxazine (13)**

Yield: 0.086 g (78%,  $R_f$  = 0.80 (9:1 hexane/ethyl acetate)); IR (neat) $\nu_{max}$  3112, 3059, 3028, 2960, 2924, 2872, 1651, 1597, 1494, 1353, 1306, 1164, 1005, 755  $\text{cm}^{-1}$ ;  $^1\text{H}$  NMR (400 MHz,  $\text{CDCl}_3$ ):  $\delta$  7.72 (d,  $J$  = 8.0 Hz, 2H), 7.51-7.48 (m, 2H), 7.37-7.30 (m, 5H), 6.75 (s, 1H), 4.03-4.00 (m, 1H), 3.70-3.64 (m, 2H), 3.53-3.48 (m, 1H), 3.26-3.21 (m, 1H), 2.45 (s, 3H);  $^{13}\text{C}$  NMR (100 MHz,  $\text{CDCl}_3$ ):  $\delta$  144.4, 139.8, 133.1, 130.1, 128.4, 128.2, 127.4, 123.8, 101.8, 71.9, 45.1, 42.4, 21.6; HRMS (ESI): Calcd. for  $\text{C}_{18}\text{H}_{19}\text{ClNO}_3\text{S}$  ( $\text{M}^+ + \text{H}$ ), ( $\text{M}^+ + \text{H} + 2$ ):  $m/z$  364.0774, 366.0744. Found: 364.0772, 366.0747.

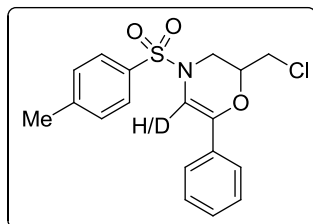

**2-(chloromethyl)-5-deutero-6-phenyl-4-tosyl-3,4-dihydro-2H-1,4-oxazine (13')**

Yield: 0.061 g (55%,  $R_f$  = 0.79 (9:1 hexane/ethyl acetate)); IR (neat) $\nu_{max}$  2957, 2925, 2855, 1725, 1637, 1598, 1494, 1356, 1167, 1089, 760  $\text{cm}^{-1}$ ;  $^1\text{H}$  NMR (500 MHz,  $\text{CDCl}_3$ ):  $\delta$  7.72 (d,  $J$  = 8.5 Hz, 2H), 7.50-7.48 (m, 2H), 7.37-7.34 (m, 4H), 7.32-7.30 (m, 1H), 6.75 (s, 0.1H), 4.02-4.00 (m, 1H), 3.70-3.64 (m, 2H), 3.52-3.49 (m, 1H), 3.26-3.22 (m, 1H), 2.45 (s, 3H);  $^{13}\text{C}$  NMR (125 MHz,  $\text{CDCl}_3$ ):  $\delta$  144.3, 139.7, 133.7, 133.2, 130.0, 128.4, 128.2, 127.4, 123.8, 101.8, 101.4 (d,  $J$  = 28.4 Hz), 72.0, 45.0, 42.4, 21.6; HRMS (ESI): Calcd. for  $\text{C}_{18}\text{H}_{17}\text{DCINO}_3\text{SNa}$  ( $\text{M}^+ + \text{Na}$ ), ( $\text{M}^+ + \text{Na} + 2$ ):  $m/z$  387.0657, 389.0627. Found: 387.0654, 389.0628.

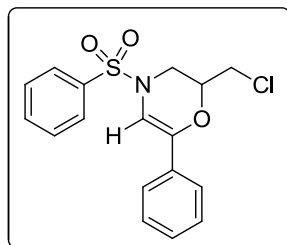

**2-(chloromethyl)-6-phenyl-4-(phenylsulfonyl)-3,4-dihydro-2H-1,4-oxazine (14)**

Yield: 0.082 g (74%,  $R_f$  = 0.78 (9:1 hexane/ethyl acetate)); IR (neat) $\nu_{max}$  3027, 2960, 2925, 2873, 1652, 1446, 1354, 1309, 1166, 1088, 1007, 749, 688  $\text{cm}^{-1}$ ;  $^1\text{H}$  NMR (400 MHz,  $\text{CDCl}_3$ ):  $\delta$  7.85 (d,  $J$  = 7.6 Hz, 2H), 7.65 (t,  $J$  = 7.2 Hz, 1H), 7.58 (dd $\rightarrow$ t,  $J$   $\sim$  7.6 Hz, 2H), 7.51 (d,  $J$  = 7.2 Hz, 2H), 7.39-7.30 (m, 3H), 6.77 (s, 1H), 4.03 (d,  $J$  = 13.2 Hz, 1H), 3.70-3.63 (m, 2H), 3.52-3.48 (m, 1H), 3.29-3.24 (m, 1H);  $^{13}\text{C}$  NMR (100 MHz,  $\text{CDCl}_3$ ):  $\delta$  139.9, 136.5, 133.5, 133.1, 129.5, 128.5, 128.3, 127.3, 123.8, 101.6, 72.0, 45.1, 42.4; HRMS (ESI): Calcd. for  $\text{C}_{17}\text{H}_{17}\text{ClNO}_3\text{S}$  ( $\text{M}^+ + \text{H}$ ), ( $\text{M}^+ + \text{H} + 2$ ):  $m/z$  350.0617, 352.0587. Found: 350.0616, 352.0584.

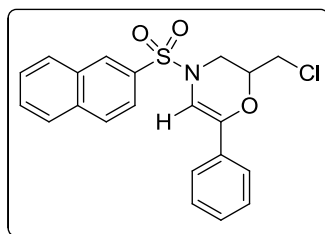

**2-(chloromethyl)-4-(naphthalen-2-ylsulfonyl)-6-phenyl-3,4-dihydro-2H-1,4-oxazine (15)**

Yield: 0.076 g (69%,  $R_f$  = 0.74 (9:1 hexane/ethyl acetate)); IR (neat) $\nu_{max}$  3027, 2959, 2926, 1653, 1498, 1448, 1350, 1308, 1164, 1133, 1074, 1007, 858, 751  $\text{cm}^{-1}$ ;  $^1\text{H}$  NMR (400 MHz,  $\text{CDCl}_3$ ):  $\delta$  8.43 (s, 1H), 8.02-7.99 (m, 2H), 7.94 (d,  $J$  = 8.5 Hz, 1H), 7.82-7.80 (m, 1H), 7.71-7.63 (m, 2H), 7.50-7.48 (m, 2H), 7.37-7.30 (m, 3H), 6.84 (s, 1H), 4.12-4.09 (m, 1H), 3.68-3.62 (m, 2H), 3.50-3.46 (m, 1H), 3.33-3.29 (m, 1H);  $^{13}\text{C}$  NMR (100 MHz,  $\text{CDCl}_3$ ):  $\delta$  139.9, 135.1, 133.6, 133.1, 132.2, 129.8, 129.4, 129.3, 128.9, 128.5, 128.3, 128.0, 127.9, 123.9, 122.3, 101.7, 72.0, 45.1, 42.4; HRMS (ESI): Calcd. for  $\text{C}_{21}\text{H}_{18}\text{ClNO}_3\text{SNa}$  ( $\text{M}^+ + \text{Na}$ ), ( $\text{M}^+ + \text{Na} + 2$ ):  $m/z$  422.0594, 424.0564. Found: 422.0595, 424.0559.

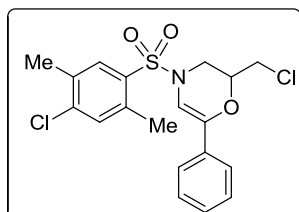

**4-((4-chloro-2,5-dimethylphenyl)sulfonyl)-2-(chloromethyl)-6-phenyl-3,4-dihydro-2H-1,4-oxazine (16)**

Yield: 0.068 g (65%,  $R_f$  = 0.79 (9:1 hexane/ethyl acetate)); IR (neat) $\nu_{max}$  2961, 2926, 2870, 2857, 1724, 1658, 1599, 1448, 1365, 1341, 1165, 1087, 1016, 758  $\text{cm}^{-1}$ ;  $^1\text{H}$  NMR (500 MHz,  $\text{CDCl}_3$ ):  $\delta$  7.84 (s, 1H), 7.51-7.50 (m, 2H), 7.38-7.30 (m, 4H), 6.75 (s, 1H), 3.95-3.90 (m, 2H), 3.77-3.73 (m, 1H), 3.60-3.56 (m, 1H), 3.29-3.25 (m, 1H), 2.62 and 2.42 (2 s, 6H);  $^{13}\text{C}$  NMR (125 MHz,  $\text{CDCl}_3$ ):  $\delta$  139.8, 139.1, 136.7, 134.8, 133.8, 133.4, 133.1, 132.4, 128.5, 128.2, 123.8, 101.6, 72.4, 44.6, 42.3, 20.5, 19.6; HRMS (ESI): Calcd. for  $\text{C}_{19}\text{H}_{19}\text{Cl}_2\text{NO}_3\text{SNa}$  ( $\text{M}^+ + \text{Na}$ ), ( $\text{M}^+ + \text{Na} + 2$ ):  $m/z$  434.0361, 436.0331. Found: 434.0363, 436.0329.

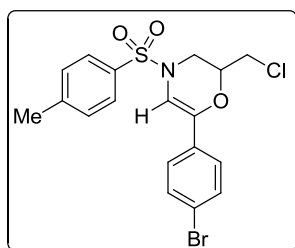

**6-(4-bromophenyl)-2-(chloromethyl)-4-tosyl-3,4-dihydro-2H-1,4-oxazine (17)**

Yield: 0.067 g (62%,  $R_f$  = 0.80 (9:1 hexane/ethyl acetate)); IR (neat) $\nu_{max}$  3110, 3028, 2960, 2924, 1651, 1596, 1490, 1355, 1308, 1166, 1088, 1006, 752  $\text{cm}^{-1}$ ;  $^1\text{H}$  NMR (400 MHz,  $\text{CDCl}_3$ ):  $\delta$  7.72-7.70 (m, 2H), 7.48-7.45 (m, 2H), 7.36-7.34 (m, 4H), 6.75 (s, 1H), 4.01-3.98 (m, 1H), 3.68-3.64 (m, 2H), 3.52-3.50 (m, 1H), 3.25-3.21 (m, 1H), 2.45 (s, 3H);  $^{13}\text{C}$  NMR (100 MHz,  $\text{CDCl}_3$ ):  $\delta$  143.5, 137.7, 132.7, 131.1, 130.5, 129.1, 126.3, 124.2, 121.0, 101.2, 71.0, 44.0, 41.3, 20.6; HRMS (ESI): Calcd. for  $\text{C}_{18}\text{H}_{17}\text{BrClINO}_3\text{SNa}$  ( $\text{M}^+ + \text{Na}$ ), ( $\text{M}^+ + \text{Na} + 2$ ), ( $\text{M}^+ + \text{Na} + 4$ ):  $m/z$  463.9699, 465.9679, 467.9659. Found: 463.9702, 465.9681, 467.9657.

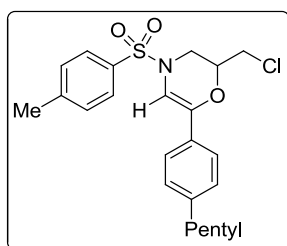

**2-(chloromethyl)-6-(4-pentylphenyl)-4-tosyl-3,4-dihydro-2H-1,4-oxazine (18)**

Yield: 0.081 g (74%,  $R_f$  = 0.81 (9:1 hexane/ethyl acetate)); IR (neat) $\nu_{max}$  3112, 3029, 2956, 2927, 2856, 1658, 1597, 1356, 1310, 1261, 1218, 1167, 1124, 1055, 1009, 813, 770  $\text{cm}^{-1}$ ;  $^1\text{H}$  NMR (500

MHz, CDCl<sub>3</sub>):  $\delta$  7.71 (d,  $J$  = 8.0 Hz, 2H), 7.39 (d,  $J$  = 8.5 Hz, 2H), 7.34 (d,  $J$  = 8.5 Hz, 2H), 7.16 (d,  $J$  = 8.0 Hz, 2H), 6.70 (s, 1H), 4.01-3.98 (m, 1H), 3.68-3.59 (m, 2H), 3.51-3.47 (m, 1H), 3.24-3.20 (m, 1H), 2.61 (t,  $J$  = 7.7 Hz, 2H), 2.45 (s, 3H), 1.64-1.58 (m, 2H), 1.36-1.30 (m, 4H), 0.90 (t,  $J$  = 7.0 Hz, 3H); <sup>13</sup>C NMR (125 MHz, CDCl<sub>3</sub>):  $\delta$  144.3, 143.3, 140.0, 133.7, 130.6, 130.0, 128.5, 127.4, 123.8, 101.1, 71.9, 45.1, 42.4, 35.6, 31.4, 31.0, 22.5, 21.6, 14.0; HRMS (ESI): Calcd. for C<sub>23</sub>H<sub>28</sub>ClNO<sub>3</sub>Na (M<sup>+</sup>+Na), (M<sup>+</sup>+Na+2):  $m/z$  456.1376, 458.1346. Found: 456.1375, 458.1350.

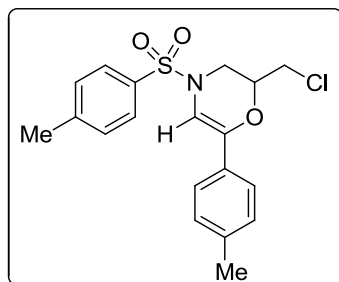

**2-(chloromethyl)-6-(p-tolyl)-4-tosyl-3,4-dihydro-2H-1,4-oxazine (19)**

Yield: 0.085 g (77%, R<sub>f</sub> = 0.78 (9:1 hexane/ethyl acetate)); Mp: 124-126 °C; IR (KBr) $\nu_{max}$  3111, 3031, 2957, 2922, 2871, 1655, 1597, 1514, 1354, 1308, 1165, 1089, 1007, 818, 758 cm<sup>-1</sup>; <sup>1</sup>H NMR (400 MHz, CDCl<sub>3</sub>):  $\delta$  7.71 (d,  $J$  = 8.0 Hz, 2H), 7.38 (d,  $J$  = 8.0 Hz, 2H), 7.34 (d,  $J$  = 8.5 Hz, 2H), 7.16 (d,  $J$  = 8.0 Hz, 2H), 6.70 (s, 1H), 4.02-4.00 (m, 1H), 3.68-3.60 (m, 2H), 3.51-3.48 (m, 1H), 3.25-3.20 (m, 1H), 2.45 and 2.40 (2s, 6H); <sup>13</sup>C NMR (100 MHz, CDCl<sub>3</sub>):  $\delta$  144.3, 140.0, 138.2, 133.7, 130.4, 130.0, 129.1, 127.4, 123.8, 101.1, 72.0, 45.1, 42.4, 21.6, 21.2; HRMS (ESI): Calcd. for C<sub>19</sub>H<sub>20</sub>ClNO<sub>3</sub>Na (M<sup>+</sup>+Na), (M<sup>+</sup>+Na+2):  $m/z$  400.0750, 402.0720. Found: 400.0743, 402.0714. This compound was crystallized from hexane/ethyl acetate (2:1) mixture at 25 °C. X-ray structure was determined for this sample.

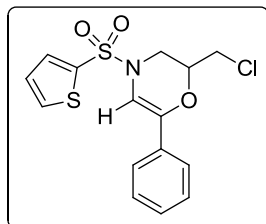

**2-(chloromethyl)-6-phenyl-4-(thiophen-2-ylsulfonyl)-3,4-dihydro-2H-1,4-oxazine (20)**

Yield: 0.076 g (69%, R<sub>f</sub> = 0.70 (9:1 hexane/ethyl acetate)); IR (neat) $\nu_{max}$  3110, 3028, 2958, 2926, 1652, 1448, 1403, 1360, 1310, 1226, 1165, 1092, 1014, 757, 724 cm<sup>-1</sup>; <sup>1</sup>H NMR (500 MHz, CDCl<sub>3</sub>):  $\delta$  7.66-7.65 (m, 1H), 7.64-7.63 (m, 1H), 7.53-7.51 (m, 2H), 7.38-7.32 (m, 3H), 7.18-7.16

(m, 1H), 6.71 (s, 1H), 4.08-4.05 (m, 1H), 3.74-3.67 (m, 2H), 3.58-3.55 (m, 1H), 3.30-3.26 (m, 1H);  $^{13}\text{C}$  NMR (125 MHz,  $\text{CDCl}_3$ ):  $\delta$  140.7, 136.6, 133.0, 132.8<sub>4</sub>, 132.8<sub>0</sub>, 128.5, 128.4, 127.9, 123.9, 101.1, 72.0, 45.2, 42.4; HRMS (ESI): Calcd. for  $\text{C}_{15}\text{H}_{15}\text{ClNO}_3\text{S}_2$  ( $\text{M}^+ + \text{H}$ ), ( $\text{M}^+ + \text{H} + 2$ ):  $m/z$  356.0182, 358.0152. Found: 356.0187, 358.0160.

#### (6) Synthesis of hydroxymethyl-1,4-oxazines 21-26 from epoxy ynamides

To an oven dried 10 mL RBF, epoxy ynamide (**1a**; 0.1 g, 0.3 mmol) in NMP/ $\text{H}_2\text{O}$ (0.9+0.1 mL), and  $\text{CuF}_2$  (0.62 g, 0.6 mmol) were added. The mixture was heated with stirring at 80 °C for 4 h. After completion of the reaction as monitored by TLC, ethyl acetate (25 mL) was added and the solution was washed with water (3 x 30 mL); the aqueous layer was extracted with ethyl acetate (3x 20 mL). The combined organic portion was dried over anhydrous  $\text{Na}_2\text{SO}_4$  and the solvent removed under reduced pressure. Purification by column chromatography (hexane/ethyl acetate 9:1) afforded compound 1,4-oxazine **21**. Compounds **22-26** were prepared by following the same procedure and by using the same molar quantities.

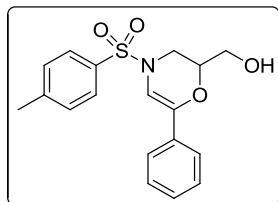

#### (6-phenyl-4-tosyl-3,4-dihydro-2H-1,4-oxazin-2-yl)methanol (**21**)

Yield: 0.082 g (78%,  $R_f$  = 0.61 (9:1 hexane/ethyl acetate)); IR (neat)  $\nu_{\text{max}}$  3531, 3064, 2987, 2881, 1651, 1448, 1349, 1263, 1214, 1162, 1061, 1005, 751  $\text{cm}^{-1}$ ;  $^1\text{H}$  NMR (500 MHz,  $\text{CDCl}_3$ ):  $\delta$  7.70 (d,  $J$  = 8.0 Hz, 2H), 7.48 (d,  $J$  = 8.0 Hz, 2H), 7.35-7.31 (m, 5H), 6.74 (s, 1H), 3.90-3.87 (m, 1H), 3.83-3.80 (m, 1H), 3.75-3.72 (m, 1H), 3.61-3.57 (m, 1H), 3.24-3.19 (m, 1H), 2.43 (s, 3H), 1.93 (br, 1H);  $^{13}\text{C}$  NMR (125 MHz,  $\text{CDCl}_3$ ):  $\delta$  144.2, 139.9, 133.8, 133.5, 130.0, 128.4, 128.1, 127.3, 123.8, 101.8, 72.9, 62.5, 44.3, 21.6; HRMS (ESI): Calcd. for  $\text{C}_{18}\text{H}_{20}\text{NO}_4\text{S}$  ( $\text{M}^+ + \text{H}$ ):  $m/z$  346.1111. Found: 346.1117.

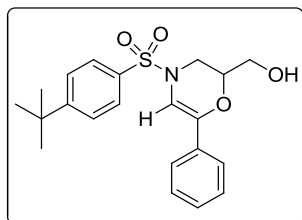

**(4-((4-(tert-butyl)phenyl)sulfonyl)-6-phenyl-3,4-dihydro-2H-1,4-oxazin-2-yl)methanol (22)**

Yield: 0.078 g (75%,  $R_f$  = 0.62 (9:1 hexane/ethyl acetate)); Mp: 106-110 °C; IR (KBr) $\nu_{max}$  3437, 2960, 2927, 2869, 1726, 1597, 1452, 1262, 1165, 1085, 1005, 843, 798  $\text{cm}^{-1}$ ;  $^1\text{H}$  NMR (400 MHz,  $\text{CDCl}_3$ ):  $\delta$  7.77-7.74 (m, 2H), 7.56-7.50 (m, 4H), 7.37-7.28 (m, 3H), 6.77 (s, 1H), 3.92-3.88 (m, 1H), 3.85-3.81 (m, 1H), 3.75-3.72 (m, 1H), 3.71-3.67 (m, 1H), 3.26-3.20 (m, 1H), 2.24 (br s, 1H), 1.35 (s, 9H);  $^{13}\text{C}$  NMR (100 MHz,  $\text{CDCl}_3$ ):  $\delta$  157.2, 139.7, 133.7, 133.5, 128.4, 128.1, 127.2, 126.4, 123.7, 101.8, 73.1, 62.4, 44.3, 35.3, 31.1; HRMS (ESI): Calcd. for  $\text{C}_{21}\text{H}_{25}\text{NO}_4\text{SNa}$  ( $\text{M}^+ + \text{Na}$ ):  $m/z$  410.1402. Found: 410.1407. This compound was crystallized from hexane/ethyl acetate (2:1) mixture at 25 °C. X-ray structure was determined for this sample.

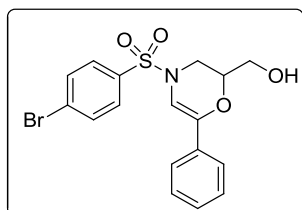

**(4-((4-bromophenyl)sulfonyl)-6-phenyl-3,4-dihydro-2H-1,4-oxazin-2-yl)methanol (23)**

Yield: 0.073 g (71%,  $R_f$  = 0.63 (9:1 hexane/ethyl acetate)); IR (neat) $\nu_{max}$  3532, 3093, 2927, 1651, 1573, 1389, 1355, 1310, 1167, 1087, 1067, 1006, 758  $\text{cm}^{-1}$ ;  $^1\text{H}$  NMR (500 MHz,  $\text{CDCl}_3$ ):  $\delta$  7.70-7.65 (m $\rightarrow$ s, 4H), 7.50-7.47 (m, 2H), 7.37-7.30 (m, 3H), 6.69 (s, 1H), 3.92-3.88 (m, 1H), 3.84-3.74 (m, 2H), 3.65-3.60 (m, 1H), 3.25-3.19 (m, 1H), 2.27 (br, 1H);  $^{13}\text{C}$  NMR (125 MHz,  $\text{CDCl}_3$ ):  $\delta$  140.6, 135.7, 133.2, 132.7, 128.8, 128.5, 128.3, 123.9, 101.2, 73.0, 62.3, 44.4; HRMS (ESI): Calcd. for  $\text{C}_{17}\text{H}_{16}\text{BrNO}_4\text{SNa}$  ( $\text{M}^+ + \text{Na}$ ), ( $\text{M}^+ + \text{Na} + 2$ ):  $m/z$  431.9881, 433.9851. Found: 431.9885, 433.9852.

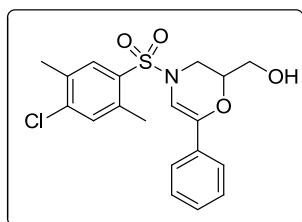

**(4-((4-chloro-2,5-dimethylphenyl)sulfonyl)-6-phenyl-3,4-dihydro-2H-1,4-oxazin-2-yl)methanol (24)**

Yield: 0.071 g (68%,  $R_f = 0.62$  (9:1 hexane/ethyl acetate)); IR (neat)  $\nu_{max}$  3437, 3064, 2923, 2857, 1697, 1452, 1365, 1320, 1224, 1158, 1026, 980, 702, 605  $\text{cm}^{-1}$ ;  $^1\text{H}$  NMR (500 MHz,  $\text{CDCl}_3$ ):  $\delta$  7.83 (s, 1H), 7.49 (d,  $J = 7.5$  Hz, 2H), 7.36-7.29 (m, 4H), 6.74 (s, 1H), 3.89-3.86 (m, 2H), 3.82-3.78 (m, 2H), 3.28-3.24 (m, 1H), 2.60 (s, 3H), 2.41 (s, 3H), 2.06 (br, 1H);  $^{13}\text{C}$  NMR (125 MHz,  $\text{CDCl}_3$ ):  $\delta$  139.6, 139.1, 136.7, 134.6, 134.0, 133.5, 133.3, 132.3, 128.8, 128.4, 128.1, 123.7, 101.6, 73.4, 62.3, 43.8, 20.3, 19.6; HRMS (ESI): Calcd. for  $\text{C}_{19}\text{H}_{20}\text{ClNO}_4\text{SNa}$  ( $\text{M}^+ + \text{Na}$ ), ( $\text{M}^+ + \text{Na} + 2$ ):  $m/z$  416.0700, 418.0670. Found: 416.0700, 418.0671.

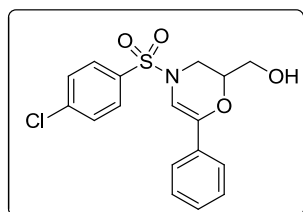

**(4-((4-chlorophenyl)sulfonyl)-6-phenyl-3,4-dihydro-2H-1,4-oxazin-2-yl)methanol (25)**

Yield: 0.079 g (76%,  $R_f = 0.63$  (9:1 hexane/ethyl acetate)); IR (neat)  $\nu_{max}$  3436, 3089, 2927, 1696, 1650, 1583, 1475, 1354, 1307, 1165, 1089, 1005, 828  $\text{cm}^{-1}$ ;  $^1\text{H}$  NMR (500 MHz,  $\text{CDCl}_3$ ):  $\delta$  7.78-7.74 (m, 2H), 7.53-7.47 (m, 4H), 7.37-7.31 (m, 3H), 6.70 (s, 1H), 3.92-3.88 (m, 1H), 3.85-3.74 (m, 2H), 3.65-3.60 (m, 1H), 3.26-3.20 (m, 1H), 2.19 (br, 1H);  $^{13}\text{C}$  NMR (125 MHz,  $\text{CDCl}_3$ ):  $\delta$  140.5, 139.9, 135.2, 133.3, 129.7, 128.7, 128.4, 128.3, 123.9, 101.2, 73.0, 62.4, 44.4; HRMS (ESI): Calcd. for  $\text{C}_{17}\text{H}_{16}\text{ClNO}_4\text{SNa}$  ( $\text{M}^+ + \text{Na}$ ), ( $\text{M}^+ + \text{Na} + 2$ ):  $m/z$  388.0387, 390.0357. Found: 388.0385, 390.0356.

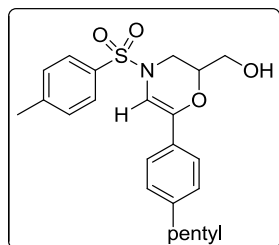

**(6-(4-pentylphenyl)-4-tosyl-3,4-dihydro-2H-1,4-oxazin-2-yl)methanol (26)**

Yield: 0.076 g (74%,  $R_f$  = 0.58 (9:1 hexane/ethyl acetate)); IR (neat)  $\nu_{max}$  3540, 2956, 2927, 2861, 1701, 1597, 1456, 1353, 1164, 1089, 1010, 734, 663  $\text{cm}^{-1}$ ;  $^1\text{H}$  NMR (500 MHz,  $\text{CDCl}_3$ ):  $\delta$  7.70 (d,  $J$  = 8.5 Hz, 2H), 7.39 (d,  $J$  = 8.0 Hz, 2H), 7.32 (d,  $J$  = 8.0 Hz, 2H), 7.16 (d,  $J$  = 8.5 Hz, 2H), 6.69 (s, 1H), 3.89-3.86 (m, 1H), 3.82-3.79 (m, 1H), 3.74-3.71 (m, 1H), 3.58-3.54 (m, 1H), 3.23-3.18 (m, 1H), 2.61 (t,  $J$  = 7.7 Hz, 2H), 2.43 (s, 3H), 1.64-1.59 (m, 2H), 1.36-1.29 (m, 5H), 0.90 (t,  $J$  = 7.0 Hz, 3H);  $^{13}\text{C}$  NMR (125 MHz,  $\text{CDCl}_3$ ):  $\delta$  144.1, 143.2, 140.2, 133.8, 130.9, 129.9, 128.5, 127.3, 123.6, 101.1, 72.8, 62.5, 44.3, 35.6, 31.4, 31.0, 22.5, 21.6, 14.0; HRMS (ESI): Calcd. for  $\text{C}_{23}\text{H}_{29}\text{NO}_4\text{SNa}$  ( $\text{M}^+ + \text{Na}$ ):  $m/z$  438.1715. Found: 438.1714.

### (7) Synthesis of 3,5-dimethylphenoxy-1,4-oxazine 27

To an oven dried 5 mL RBF, epoxy-ynamide (**1a**; 0.100 g, 0.3 mmol), 3,5-dimethylphenol (0.055 g, 0.45 mmol),  $\text{CuF}_2$  (0.015 g, 0.015 mmol) and  $\text{K}_2\text{CO}_3$  (0.021 g, 0.015 mmol) were added. The contents were mixed thoroughly and the mixture was heated in a microwave oven [MW; 120  $^\circ\text{C}$ /10 min]. After completion of the reaction as monitored by TLC, DCM (15 mL) was added, the mixture filtered and the filtrate concentrated under reduced pressure. The crude product was purified by using flash column chromatography (neutral alumina; slow column led to decomposition of the product) to obtain pure 3,5-dimethylphenoxy-1,4-oxazine **27** by using hexane-ethyl acetate (9:1) mixture as the eluent. [Note: In silica gel compound decomposed very fast]

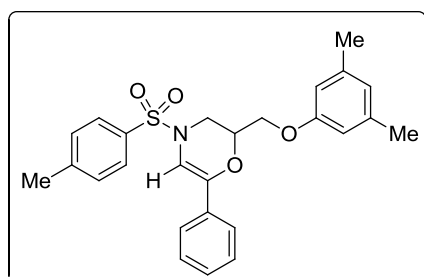

### 2-((3,5-dimethylphenoxy)methyl)-6-phenyl-4-tosyl-3,4-dihydro-2H-1,4-oxazine (27)

Yield: 0.121 g (89%, gummy liquid,  $R_f$  = 0.89 (hexane, neutral alumina )); IR (neat)  $\nu_{max}$  3281, 2922, 1663, 1594, 1495, 1329, 1295, 1159, 911  $\text{cm}^{-1}$ ;  $^1\text{H}$  NMR (400 MHz,  $\text{CDCl}_3$ ):  $\delta$  7.81 (d,  $J$  = 8.0 Hz, 2H), 7.48 (d,  $J$  = 8.0 Hz, 2H), 7.31-7.24 (m, 4H), 7.15-7.11 (m, 1H), 6.66 (s, 1H), 6.41 (s, 2H), 5.97 (s, 1H), 4.59-4.53 (m, 1H), 4.09-4.04 (m, 1H), 3.98-3.89 (m, 2H), 3.54-3.50 (m, 1H),

2.40 (s, 3H), 2.29 (s, 6H);  $^{13}\text{C}$  NMR (100 MHz,  $\text{CDCl}_3$ ):  $\delta$  157.9, 146.8, 144.9, 139.3, 135.4, 133.6, 129.9, 128.3, 127.6, 127.5, 125.1, 123.3, 112.3, 88.6, 74.9, 66.9, 48.7, 21.6, 21.4; HRMS (ESI): Calcd for  $\text{C}_{26}\text{H}_{28}\text{NO}_4\text{S}$  ( $\text{M}^+ + \text{H}$ )  $m/z$  450.1739. Found: 450.1739.

### (8) Synthesis of 1,2-dioxo-amides **28-31** and **33**

To an oven dried 10 mL RBF, epoxy ynamide (**1f**; 0.1 g, 0.25 mmol) in dry DMC (1 mL),  $\text{AgF}_2$  (0.185 g, 1.27 mmol) was added. The mixture was kept for stirring at 30 °C for 12 h. After completion of the reaction as monitored by TLC, the mixture was passed through celite and concentrated in vacuum. Purification by column chromatography (hexane/ethyl acetate 9:1) afforded compound 1,2-dioxoenamide **28**. Compounds **29-31** and **33** were prepared following the same procedure and by using the same molar quantities.

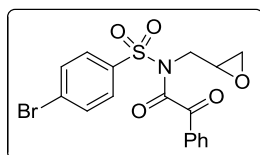

#### ***N-((4-bromophenyl)sulfonyl)-N-(oxiran-2-ylmethyl)-2-oxo-2-phenylacetamide (28)***

Yield: 0.076 g (71%,  $R_f$  = 0.73 (9:1 hexane/ethyl acetate)); IR (neat)  $\nu_{\text{max}}$  3092, 3068, 2925, 1682, 1573, 1450, 1371, 1210, 1171, 1069, 1008, 945, 823, 741, 612  $\text{cm}^{-1}$ ;  $^1\text{H}$  NMR (500 MHz,  $\text{CDCl}_3$ ):  $\delta$  7.98-7.93 (m, 4H), 7.79-7.77 (m, 2H), 7.71-7.68 (m, 1H), 7.59-7.56 (m, 2H), 4.03-3.92 (m, 2H), 3.24-3.21 (m, 1H), 2.83 (t,  $J$  = 4.2 Hz, 1H), 2.71-2.69 (m, 1H);  $^{13}\text{C}$  NMR (125 MHz,  $\text{CDCl}_3$ ):  $\delta$  187.5, 167.1, 136.2, 134.8, 132.7, 132.5, 130.3, 130.1, 129.8, 128.9, 49.1, 47.0, 46.4; HRMS (ESI): Calcd. for  $\text{C}_{17}\text{H}_{14}\text{BrNO}_5\text{SNa}$  ( $\text{M}^+ + \text{Na}$ ):  $m/z$  445.9674, 447.9654. Found: 445.9674, 447.9656.

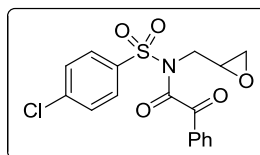

#### ***N-((4-chlorophenyl)sulfonyl)-N-(oxiran-2-ylmethyl)-2-oxo-2-phenylacetamide (29)***

Yield: 0.081 g (73%,  $R_f$  = 0.72 (9:1 hexane/ethyl acetate)); Mp 104-108 °C (white solid); IR (KBr)  $\nu_{\text{max}}$  3089, 3068, 2924, 1682, 1583, 1370, 1209, 1169, 1086, 1011, 924, 757, 713, 688  $\text{cm}^{-1}$ ;  $^1\text{H}$  NMR (500 MHz,  $\text{CDCl}_3$ ):  $\delta$  8.03-8.01 (m, 2H), 7.98-7.96 (m, 2H), 7.71-7.68 (m, 1H), 7.62-7.56

(m, 4H), 4.03-3.92 (m, 2H), 3.24-3.21 (m, 1H), 2.82 (t,  $J = 4.5$  Hz, 1H), 2.70-2.69 (m, 1H);  $^{13}\text{C}$  NMR (125 MHz,  $\text{CDCl}_3$ ):  $\delta$  187.6, 167.2, 141.6, 135.6, 134.8, 132.5, 130.1, 129.8, 129.7, 129.0, 49.1, 47.0, 46.4; HRMS (ESI): Calcd. for  $\text{C}_{17}\text{H}_{14}\text{ClNO}_5\text{SNa}$  ( $\text{M}^+ + \text{Na}$ ), ( $\text{M}^+ + \text{Na} + 2$ ):  $m/z$  402.0179, 404.0149. Found: 402.0179, 404.0149.

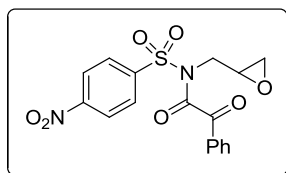

***N-((4-nitrophenyl)sulfonyl)-N-(oxiran-2-ylmethyl)-2-oxo-2-phenylacetamide (30)***

Yield: 0.082 g (74%; purity ~97%,  $R_f = 0.61$  (9:1 hexane/ethyl acetate)); Mp 168-170 °C (white solid); IR (KBr) $\nu_{\text{max}}$  3108, 1684, 1597, 1533, 1404, 1376, 1350, 1258, 1210, 1173, 1086, 1045, 924, 855, 739, 617  $\text{cm}^{-1}$ ;  $^1\text{H}$  NMR (500 MHz,  $\text{CDCl}_3$ ):  $\delta$  8.48-8.46 (m, 2H), 8.31-8.29 (m, 2H), 7.99-7.97 (m, 2H), 7.73-7.70 (m, 1H), 7.61-7.57 (m, 2H), 4.26-4.23 (m, 1H), 3.96-3.92 (m, 1H), 3.23-3.20 (m, 1H), 2.82 (t,  $J = 4.5$  Hz, 1H), 2.68-2.67 (m, 1H);  $^{13}\text{C}$  NMR (125 MHz,  $\text{CDCl}_3$ ):  $\delta$  187.4, 166.9, 151.1, 142.9, 135.0, 132.2, 130.2, 129.9, 129.0, 124.4, 49.1, 47.4, 46.0; HRMS (ESI): Calcd. for  $\text{C}_{17}\text{H}_{15}\text{N}_2\text{O}_7\text{S}$  ( $\text{M}^+ + \text{H}$ ):  $m/z$  391.0600. Found: 391.0600. This compound was crystallized from hexane/ethyl acetate (2:1) mixture at 25 °C. X-ray structure was determined for this sample.

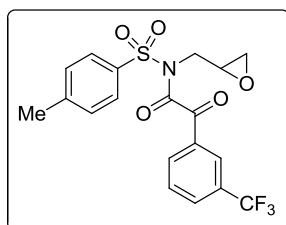

***N-(oxiran-2-ylmethyl)-2-oxo-N-tosyl-2-(3-(trifluoromethyl)phenyl)acetamide (31)***

Yield: 0.091 g (85%,  $R_f = 0.70$  (9:1 hexane/ethyl acetate)); IR (neat) $\nu_{\text{max}}$  2928, 1740, 1699, 1597, 1363, 1331, 1165, 1125, 1092, 1075, 814  $\text{cm}^{-1}$ ;  $^1\text{H}$  NMR (400 MHz,  $\text{CDCl}_3$ ):  $\delta$  8.27 (br, 1H), 8.13 (d,  $J = 7.6$  Hz, 1H), 7.92 (d,  $J = 8.4$  Hz, 3H), 7.72 (t,  $J = 7.8$  Hz, 1H), 7.44 (d,  $J = 8.0$  Hz, 2H), 4.00-3.91 (m, 2H), 3.23-3.19 (m, 1H), 2.82 (t,  $J = 4.2$  Hz, 1H), 2.71-2.70 (m, 1H), 2.50 (s, 3H);  $^{13}\text{C}$  NMR (100 MHz,  $\text{CDCl}_3$ ):  $\delta$  186.1, 166.8, 146.4, 133.8, 133.4, 133.1, 131.7 (q,  $J = 66.5$  Hz), 130.8 (q,  $J =$

7.0 Hz), 130.2, 129.6, 128.6, 126.1 (q,  $J = 8.0$  Hz), 123.5 (q,  $J = 270.8$  Hz), 49.0, 46.7, 46.5, 21.8;  $^{19}\text{F}$  NMR (470 MHz,  $\text{CDCl}_3$ ): -62.9; HRMS (ESI): Calcd. for  $\text{C}_{19}\text{H}_{17}\text{F}_3\text{NO}_5\text{S}$  ( $\text{M}^+ + \text{H}$ ):  $m/z$  428.0779. Found: 428.0779.

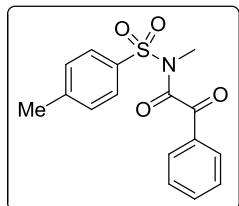

### ***N*-methyl-2-oxo-2-phenyl-*N*-tosylacetamide (33)**

Yield: 0.086 g (78%,  $R_f = 0.72$  (9:1 hexane/ethyl acetate)); Mp 116-120 °C (white solid); IR (neat)  $\nu_{\text{max}}$  2923, 2853, 1739, 1677, 1595, 1368, 1230, 1202, 1087, 945, 662  $\text{cm}^{-1}$ ;  $^1\text{H}$  NMR (400 MHz,  $\text{CDCl}_3$ ):  $\delta$  7.98-7.90 (m, 4H), 7.70-7.65 (m, 1H), 7.56 (t,  $J = 7.8$  Hz, 2H), 7.42 (d,  $J = 8.0$  Hz, 2H), 3.27 (s, 3H), 2.50 (s, 3H);  $^{13}\text{C}$  NMR (100 MHz,  $\text{CDCl}_3$ ):  $\delta$  188.1, 167.3, 145.9, 134.5, 133.5, 132.8, 130.1, 129.7, 128.9, 128.4, 30.7, 21.7; HRMS (ESI): Calcd. for  $\text{C}_{16}\text{H}_{15}\text{NO}_4\text{S}$  ( $\text{M}^+ + \text{Na}$ ):  $m/z$  340.0620. Found: 340.0622. This compound has been prepared previously by a different method (S. W. Kim, T. -W. Um and S. Shin, *J. Org. Chem.* 2018, **83**, 4703.)

## **(9) Synthesis of ynamide 34 and $\alpha,\beta$ -dibromo enamide 35**

**Synthesis of ynamide 34:** To a mixture of *N*-(2-bromoethyl)-4-methylbenzenesulfonamide (1.00 g, 3.62 mmol),  $\text{CuSO}_4 \cdot 5\text{H}_2\text{O}$  (0.180 g, 0.72 mmol), 1,10-phenanthroline monohydrate (0.287 g, 1.44 mmol) and  $\text{K}_2\text{CO}_3$  (1.25 g, 9.0 mmol) in dry THF (20 mL), (bromoethynyl)benzene (0.786 g, 4.34 mmol) was added. The vessel was stoppered under nitrogen atmosphere and heated overnight on an oil-bath maintained at 70 °C. The mixture was filtered and concentrated in vacuum. The crude product was purified by using silica gel column chromatography to obtain the pure ynamide **34** by using hexane-ethyl acetate (8:2) as the eluent.

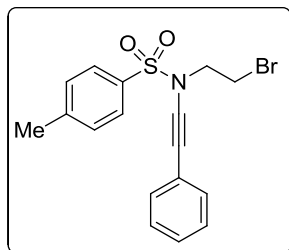

### ***N*-(2-bromoethyl)-4-methyl-*N*-(phenylethynyl)benzenesulfonamide (34)**

Yield: 1.03 g (76%,  $R_f$  = 0.67 (9:1 hexane/ethyl acetate)); IR (neat) $\nu_{max}$  3061, 2925, 2855, 2235, 1730, 1704, 1597, 1493, 1367, 1289, 1168, 1119, 1089, 1020, 958, 813, 755  $\text{cm}^{-1}$ ;  $^1\text{H}$  NMR (400 MHz,  $\text{CDCl}_3$ ):  $\delta$  7.89 (d,  $J$  = 8.4 Hz, 2H), 7.40–7.33 (m, 7H), 3.83 (t,  $J$  = 7.4 Hz, 2H), 3.58 (t,  $J$  = 7.4 Hz, 2H), 2.49 (s, 3H).;  $^{13}\text{C}$  NMR (100 MHz,  $\text{CDCl}_3$ ):  $\delta$  145.2, 134.3, 131.6, 129.9, 128.4, 128.2, 127.8, 122.3, 81.4, 71.2, 52.7, 27.5, 21.7; HRMS (ESI): Calcd for  $\text{C}_{17}\text{H}_{17}\text{BrNO}_2\text{S}$  ( $\text{M}^+ + \text{H}$ ), ( $\text{M}^+ + \text{H} + 2$ )  $m/z$  378.0163, 380.0143. Found 378.0164, 380.0145.

**Synthesis of  $\alpha,\beta$ -dibromo enamide **35**:** To an oven dried 10 mL RBF (round bottom flask) N-(2-bromoethyl)-4-methyl-N-(phenylethynyl)benzenesulfonamide **34** (0.3 mmol) in dry acetonitrile (1 mL), CuBr (0.6 mmol) was added at 25 °C. After completion of the reaction as monitored by TLC, the contents were passed through a pad of celite, washed with ethyl acetate (2 x 20 mL) and concentrated *in vacuo*. Purification by column chromatography (hexane/ethyl acetate 9:1) afforded compound **35**.

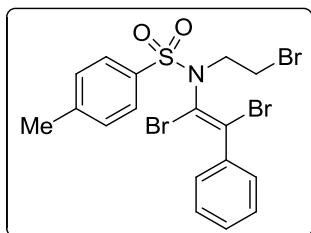

**(*E*)-N-(2-bromoethyl)-N-(1,2-dibromo-2-phenylvinyl)-4-methylbenzenesulfonamide (**35**)**

Yield: 0.131 g (92%; *E/Z*: 7:3; pure *E*-isomer was isolated), white solid,  $R_f$  = 0.76 (9:1 hexane/ethyl acetate)); Mp: 132–134 °C IR (KBr) $\nu_{max}$  2954, 2923, 2853, 1597, 1492, 1445, 1361, 1165, 1087, 967, 899, 813, 695  $\text{cm}^{-1}$ ;  $^1\text{H}$  NMR (400 MHz,  $\text{CDCl}_3$ ):  $\delta$  7.90 (d,  $J$  = 8.0 Hz, 2H), 7.47–7.37 (m, 7H), 3.92–3.86 (m, 1H), 3.75–3.70 (m, 1H), 3.60–3.47 (m, 2H), 2.48 (s, 3H).;  $^{13}\text{C}$  NMR (100 MHz,  $\text{CDCl}_3$ ):  $\delta$  145.1, 138.8, 134.6, 129.8, 129.6, 128.9, 128.8, 128.5, 126.9, 116.2, 50.4, 27.2, 21.7; HRMS (ESI): Calcd. for  $\text{C}_{17}\text{H}_{16}\text{Br}_3\text{NO}_2\text{SNa}$  ( $\text{M}^+ + \text{Na}$ ), ( $\text{M}^+ + \text{Na} + 2$ ), ( $\text{M}^+ + \text{Na} + 4$ ), ( $\text{M}^+ + \text{Na} + 6$ ):  $m/z$  557.8350, 559.8330, 561.8310, 563.8290. Found: 557.8352, 559.8336, 561.8316, 563.8293. This compound was crystallized from DCM/ethyl acetate (2:1) mixture at 25 °C. X-ray structure was determined for this sample.

**(10) X-ray data and crystal structures of 4, 8, 19, 22, 30, and 35**

**Compound 4:**  $C_{18}H_{16}Br_2FNO_3S$ ,  $M = 505.20$ , Triclinic, Space group  $P-1$ ,  $a = 6.9921(3)$ ,  $b = 11.2113(6)$ ,  $c = 12.4434(7)$  Å,  $V = 959.19(9)$  Å<sup>3</sup>,  $\alpha = 96.443(2)$ ,  $\beta = 95.376(2)$ ,  $\gamma = 95.626(2)$ ,  $Z = 2$ ,  $\mu = 4.361\text{mm}^{-1}$ , data/restraints/parameters: 3377/0/237, R indices ( $I > 2\sigma(I)$ )  $R1 = 0.0479$ ,  $wR2$  (all data) = 0.1485. CCDC No. 1885280.

**Compound 8:**  $C_{17}H_{14}Br_3NO_3S$ ,  $M = 552.08$ , Triclinic, Space group  $P-1$ ,  $a = 6.9458(2)$ ,  $b = 10.9848(2)$ ,  $c = 12.6203(4)$  Å,  $V = 946.11(4)$  Å<sup>3</sup>,  $\alpha = 95.166(2)$ ,  $\beta = 94.677(2)$ ,  $\gamma = 97.680(2)$ ,  $Z = 2$ ,  $\mu = 6.522\text{mm}^{-1}$ , data/restraints/parameters: 3962/0/226, R indices ( $I > 2\sigma(I)$ )  $R1 = 0.0509$ ,  $wR2$  (all data) = 0.1223. CCDC No. 1885281.

**Compound 19:**  $C_{19}H_{20}ClNO_3S$ ,  $M = 377.87$ , Monoclinic, Space group  $C2/c$ ,  $a = 18.258(2)$ ,  $b = 13.0810(13)$ ,  $c = 15.4466(14)$  Å,  $V = 3687.2(6)$  Å<sup>3</sup>,  $\alpha = 90$ ,  $\beta = 91.845(3)$ ,  $\gamma = 90$ ,  $Z = 8$ ,  $\mu = 0.338\text{mm}^{-1}$ , data/restraints/parameters: 3227/0/229, R indices ( $I > 2\sigma(I)$ )  $R1 = 0.0488$ ,  $wR2$  (all data) = 0.1434. CCDC No. 1885282.

**Compound 22:**  $C_{21}H_{25}NO_4S$ ,  $M = 387.48$ , Triclinic, Space group  $P-1$ ,  $a = 10.994(13)$ ,  $b = 12.052(15)$ ,  $c = 16.90(2)$  Å,  $V = 2130(4)$  Å<sup>3</sup>,  $\alpha = 95.131(11)$ ,  $\beta = 99.760(11)$ ,  $\gamma = 103.107(11)$ ,  $Z = 4$ ,  $\mu = 0.176\text{mm}^{-1}$ , data/restraints/parameters: 5863/0/498, R indices ( $I > 2\sigma(I)$ )  $R1 = 0.0954$ ,  $wR2$  (all data) = 0.3278. CCDC No. 1885283.

**Compound 30:**  $C_{17}H_{14}N_2O_7S$ ,  $M = 390.36$ , Monoclinic, Space group  $P2(1)/n$ ,  $a = 7.4466(5)$ ,  $b = 24.7338(15)$ ,  $c = 9.6421(5)$  Å,  $V = 1718.87(18)$  Å<sup>3</sup>,  $\alpha = 90$ ,  $\beta = 104.560(2)$ ,  $\gamma = 90$ ,  $Z = 4$ ,  $\mu = 0.233\text{mm}^{-1}$ , data/restraints/parameters: 3032/0/247, R indices ( $I > 2\sigma(I)$ )  $R1 = 0.0435$ ,  $wR2$  (all data) = 0.1128. CCDC No. 1885284.

**Compound 35:**  $C_{17}H_{16}Br_3NO_2S$ ,  $M = 538.10$ , Monoclinic, Space group  $P2(1)/c$ ,  $a = 8.2985(3)$ ,  $b = 12.4303(6)$ ,  $c = 19.4432(8)$  Å,  $V = 1966.59(14)$  Å<sup>3</sup>,  $\alpha = 90$ ,  $\beta = 101.3220(10)$ ,  $\gamma = 90$ ,  $Z = 4$ ,  $\mu = 6.269\text{mm}^{-1}$ , data/restraints/parameters: 3431/0/218, R indices ( $I > 2\sigma(I)$ )  $R1 = 0.0394$ ,  $wR2$  (all data) = 0.1036. CCDC No. 1885285.

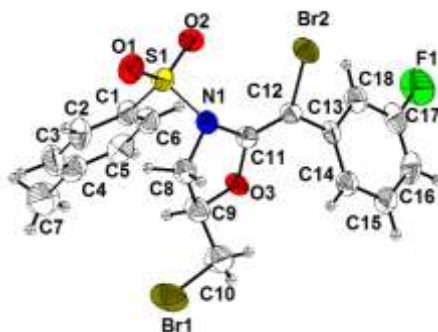

**Figure S1.** ORTEP diagram of compound **4** (probability ellipsoid at 30%). Selected bond lengths [Å] with esds in parentheses: S1-N1 1.694(4), N1-C8 1.479(6), O3-C9 1.441(5), O3-C11 1.358(5), C11-C12 1.326(6), Br2-C12 1.899(4), Br1-C10 1.928(5), C9-C10 1.491(7), C12-C13 1.477(5).

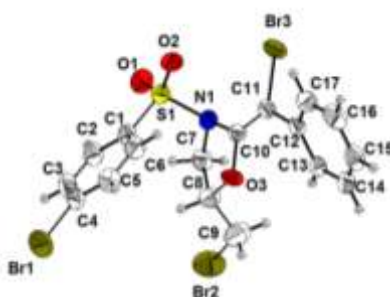

**Figure S2.** ORTEP diagram of compound **8** (probability ellipsoid at 30%). Selected bond lengths [Å] with esds in parentheses:

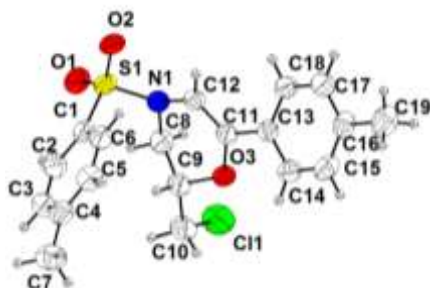

**Figure S3.** ORTEP diagram of compound **19** (probability ellipsoid at 30%). Selected bond lengths [Å] with esds in parentheses: S1-N1 1.6563(19), N1-C8 1.470(3), N1-C12 1.419(3), C12-C11 1.332(3), C13-C11 1.471(3), O3-C11 1.377(2), O3-C9 1.436(3), Cl1-C10 1.770(3), C9-C8 1.504(3), C9-C10 1.514(3).

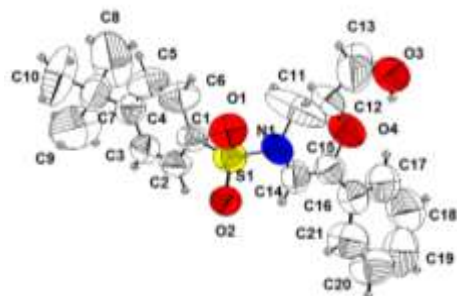

**Figure S4.** ORTEP diagram of compound **22** (probability ellipsoid at 30%). Selected bond lengths [Å] with esds in parentheses: S1-N1 1.668(8), N1-C14 1.409(11), N1-C11 1.446(13), C12-C11 1.388(16), C15-C14 1.346(13), O4-C15 1.373(11), O3-C13 1.422(17), C15-C16 1.433(13), O4-C12 1.357(13), C12-C13 1.402(17).

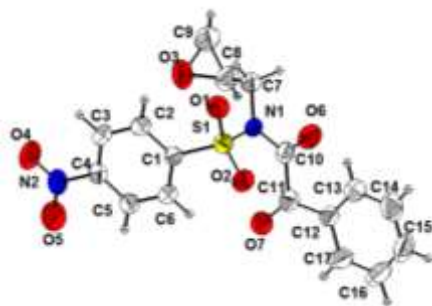

**Figure S5.** ORTEP diagram of compound **30** (probability ellipsoid at 30%). Selected bond lengths [Å] with esds in parentheses: N1-C10 1.393(3), C10-C11 1.539(3), O6-C10 1.204(3), O7-C11 1.206(3), C11-C12 1.476(3), N1-C7 1.479(3), C7-C8 1.506(4), C8-C9 1.432(4), O3-C8 1.409(3), O3-C9 1.431(4).

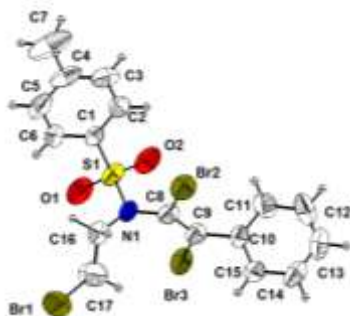

**Figure S6.** ORTEP diagram of compound **35** (probability ellipsoid at 30%). Selected bond lengths [Å] with esds in parentheses: S1-N1 1.663(3), N1-C8 1.394(5), C8-C9 1.309(6), C10-C9 1.488(5), Br2-C8 1.931(4), Br3-C9 1.890(4), Br1-C17 1.919(6), N1-C16 1.496(6), C16-C17 1.486(7).

**(11) References:**

1. D. D. Perrin, W. L. F. Armarego and D. R. Perrin, *Purification of Laboratory Chemicals*, Pergamon, Oxford, 1986.
2. (a) G. M. Sheldrick, *SADABS, Siemens Area Detector Absorption Correction*, University of Göttingen, Germany, 1996; (b) G. M. Sheldrick, *SHELX-97- A program for crystal structure solution and refinement*, University of Göttingen, 1997; (c) G. M. Sheldrick, *SHELXTL NT Crystal Structure Analysis Package*, Bruker AXS, Analytical X-ray System, WI, USA, 1999, version 5.10.
3. A. Leela Siva Kumari, A. Siva Reddy and K. C. Kumara Swamy, *Org. Lett.* 2016, **18**, 5752.

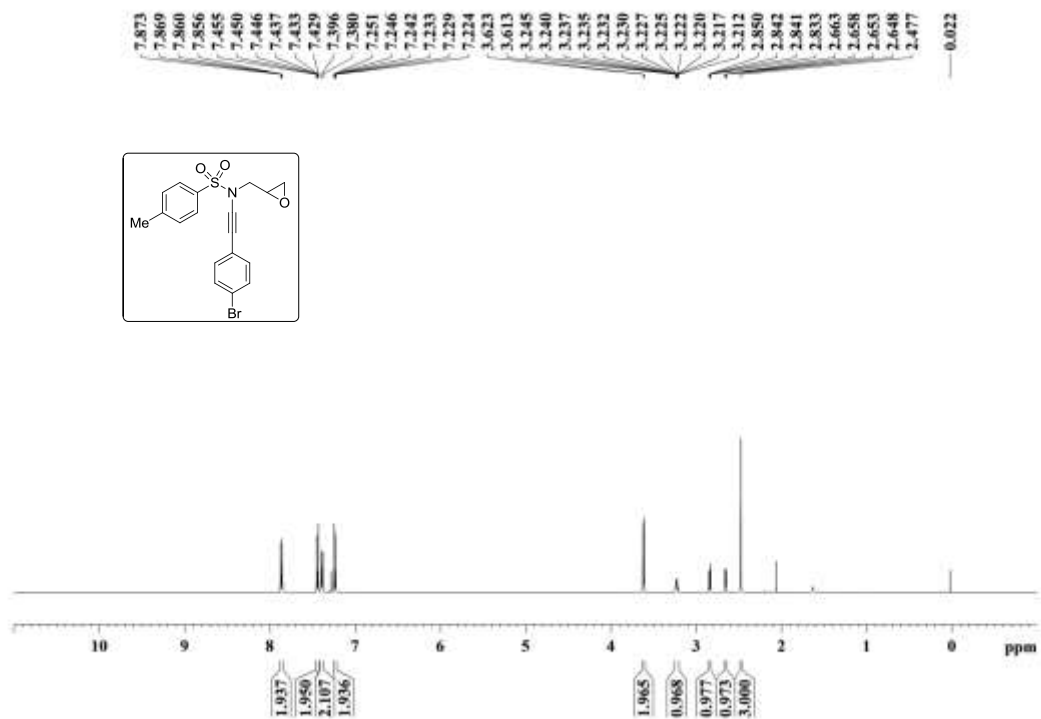

**Figure S7.** <sup>1</sup>H NMR spectrum of compound **1h**

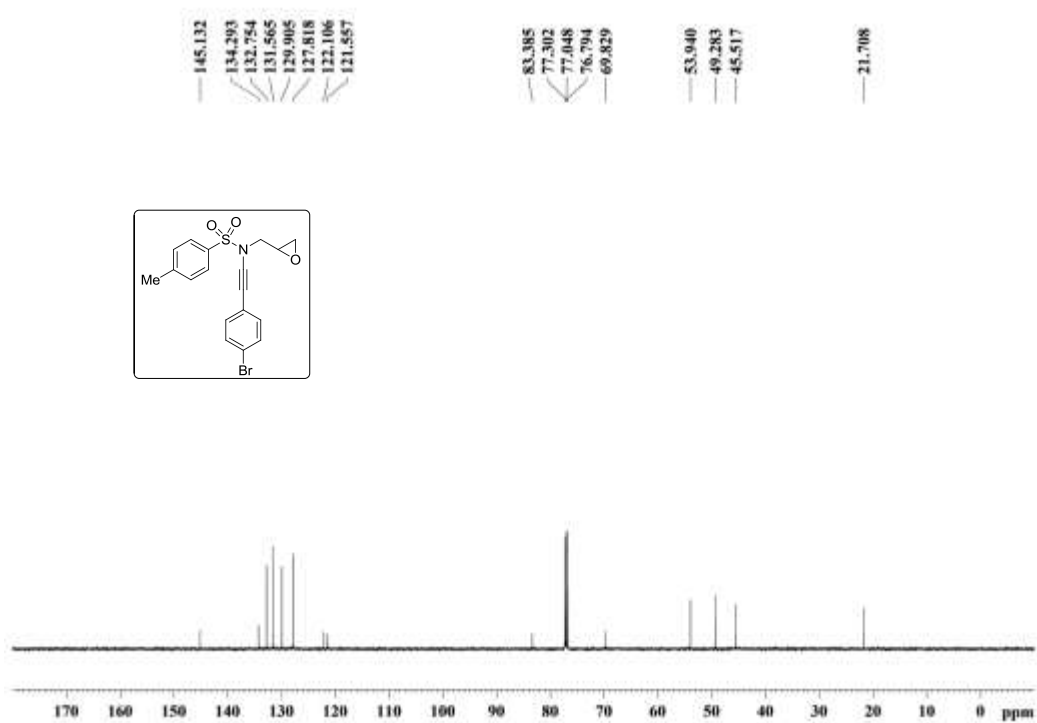

**Figure S8.** <sup>13</sup>C NMR spectrum of compound **1h**

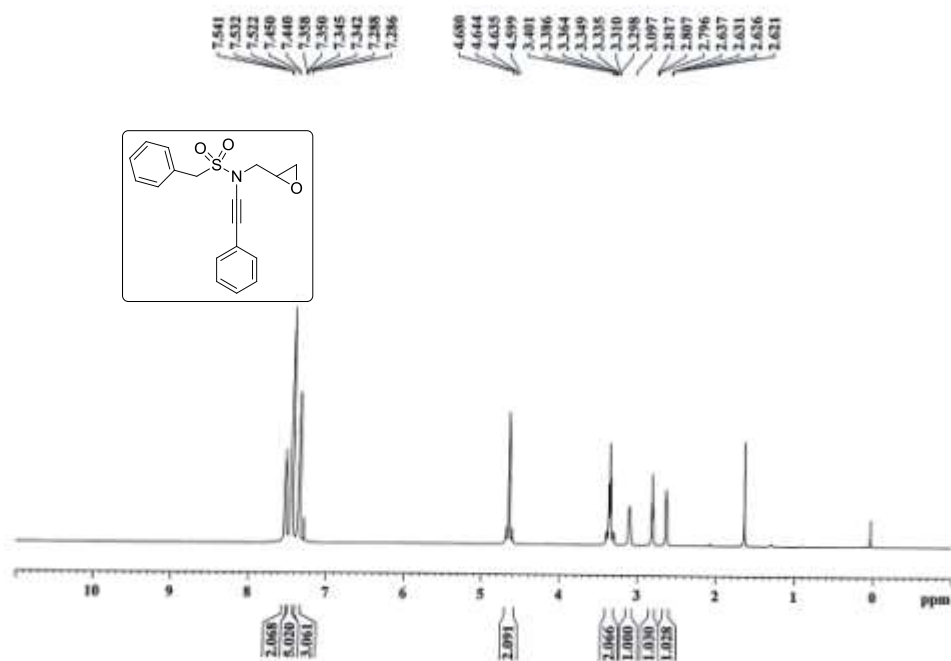

**Figure S9.** <sup>1</sup>H NMR spectrum of compound **1i**

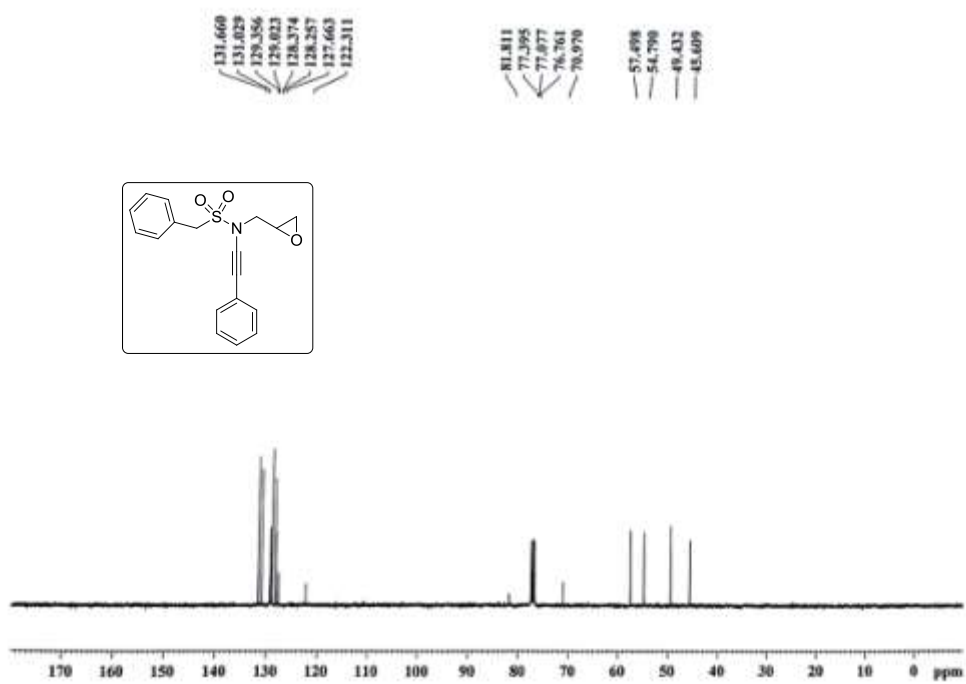

**Figure S10.** <sup>13</sup>C NMR spectrum of compound **1i**

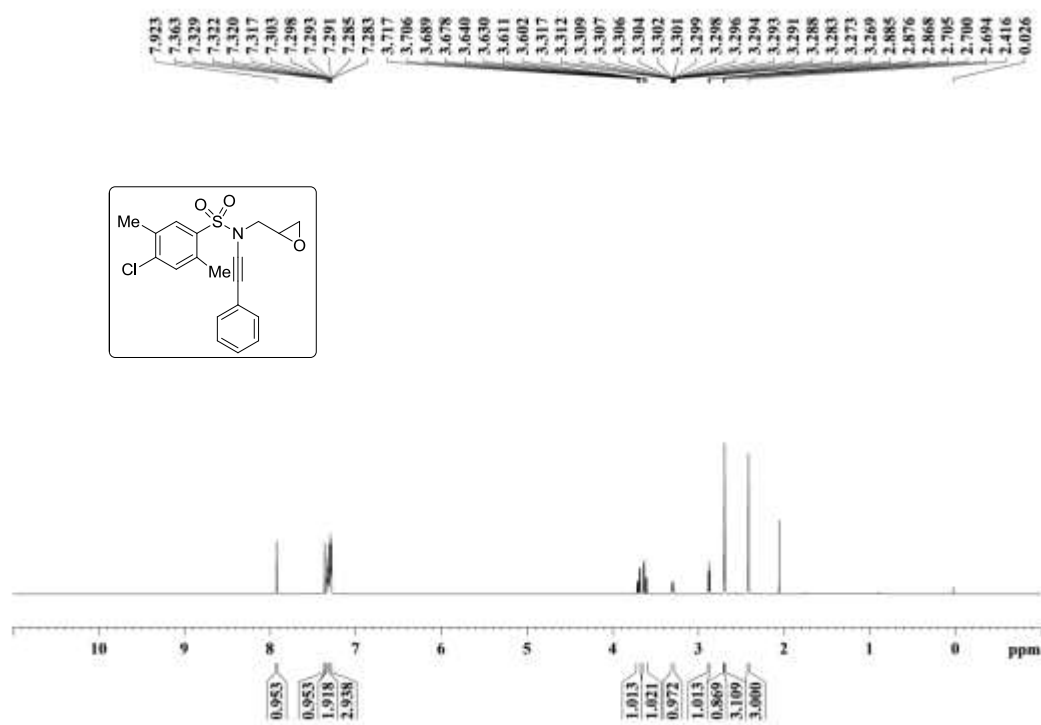

**Figure S11.** <sup>1</sup>H NMR spectrum of compound **1j**

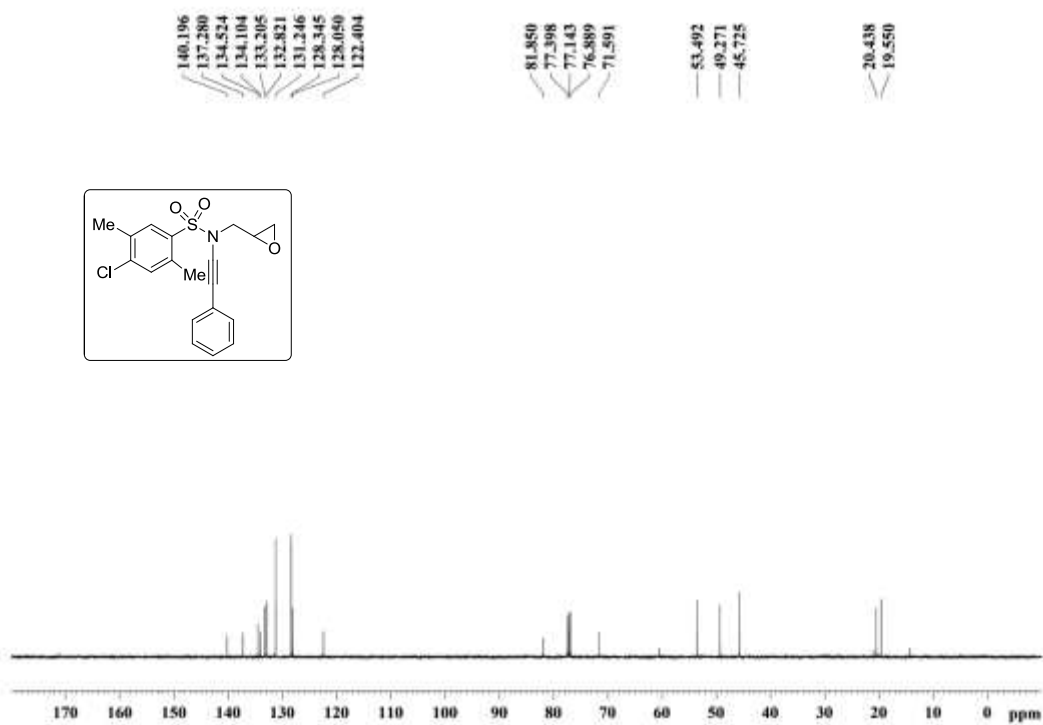

**Figure S12.** <sup>13</sup>C NMR spectrum of compound **1j**

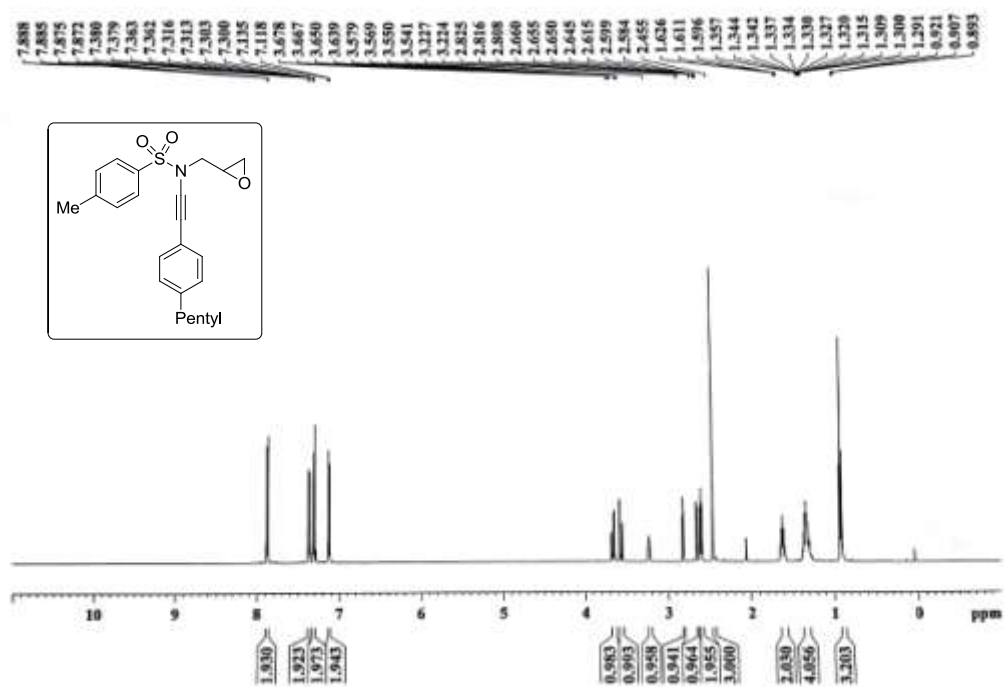

**Figure S13.** <sup>1</sup>H NMR spectrum of compound 1k

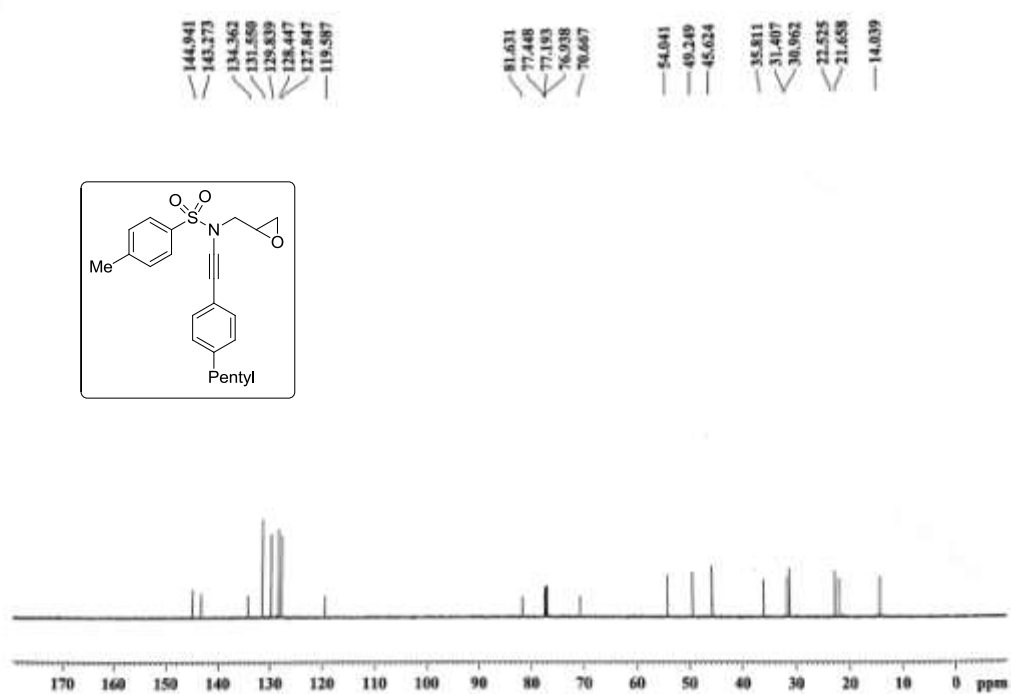

**Figure S14.** <sup>13</sup>C NMR spectrum of compound 1k

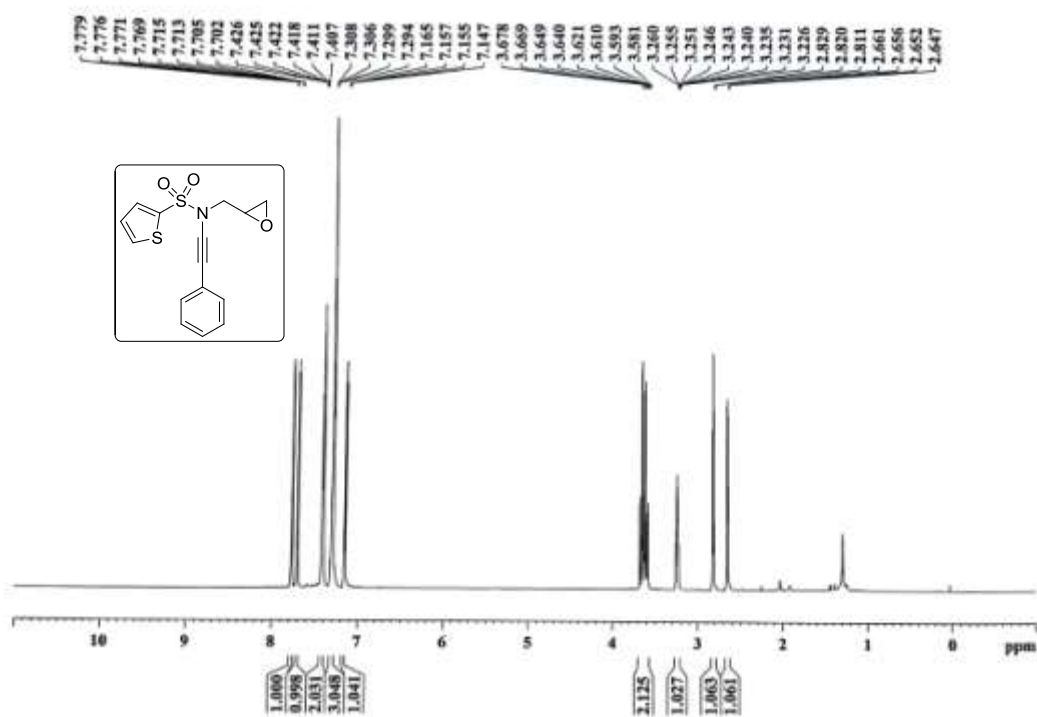

**Figure S15.** <sup>1</sup>H NMR spectrum of compound 1I

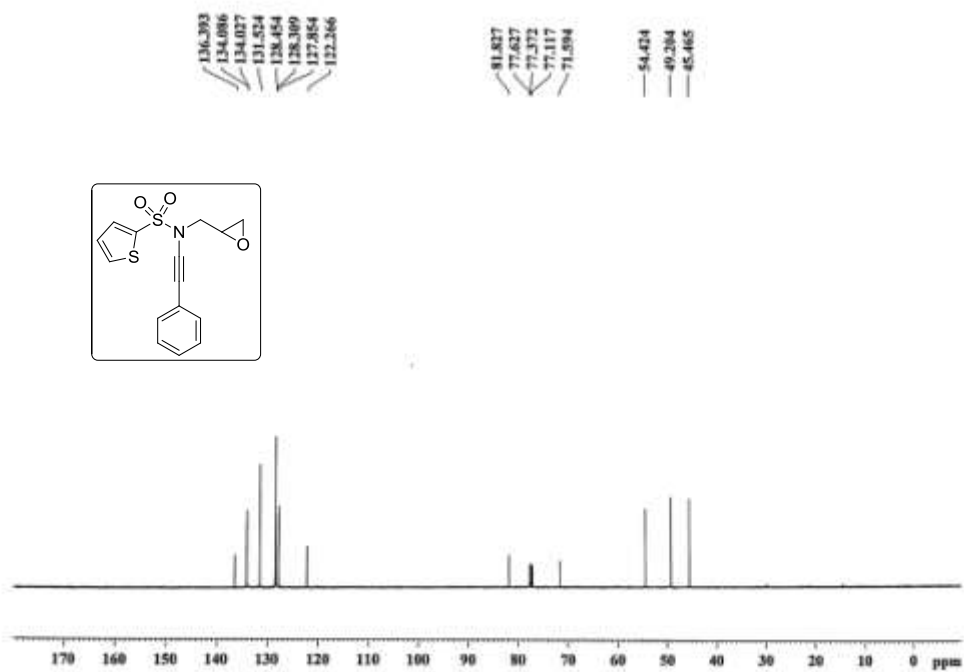

**Figure S16.** <sup>13</sup>C NMR spectrum of compound 1I

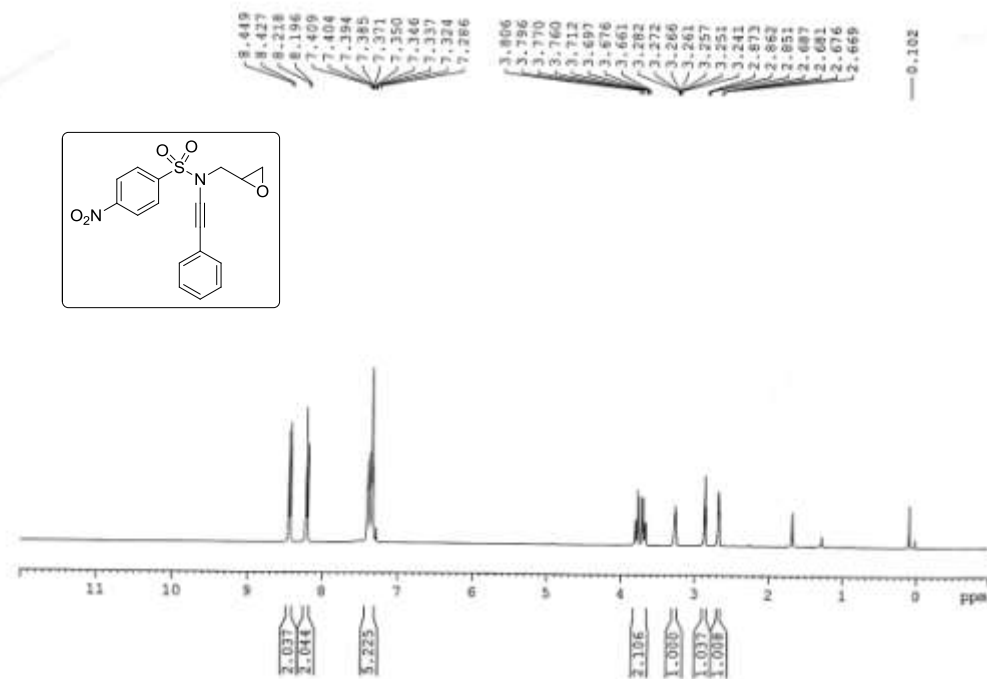

**Figure S17.** <sup>1</sup>H NMR spectrum of compound **1n**

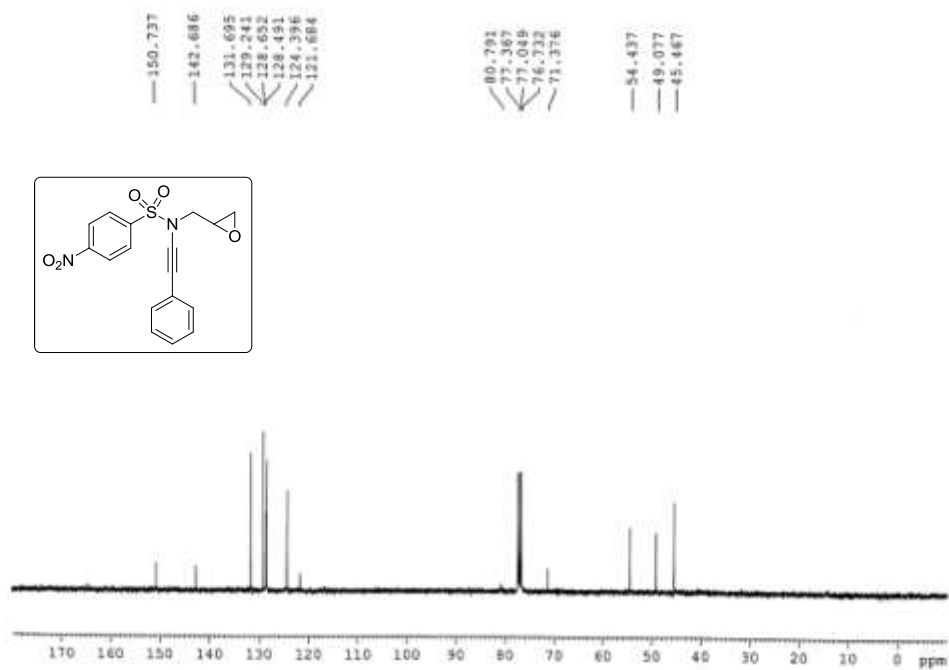

**Figure S18.** <sup>13</sup>C NMR spectrum of compound **1n**

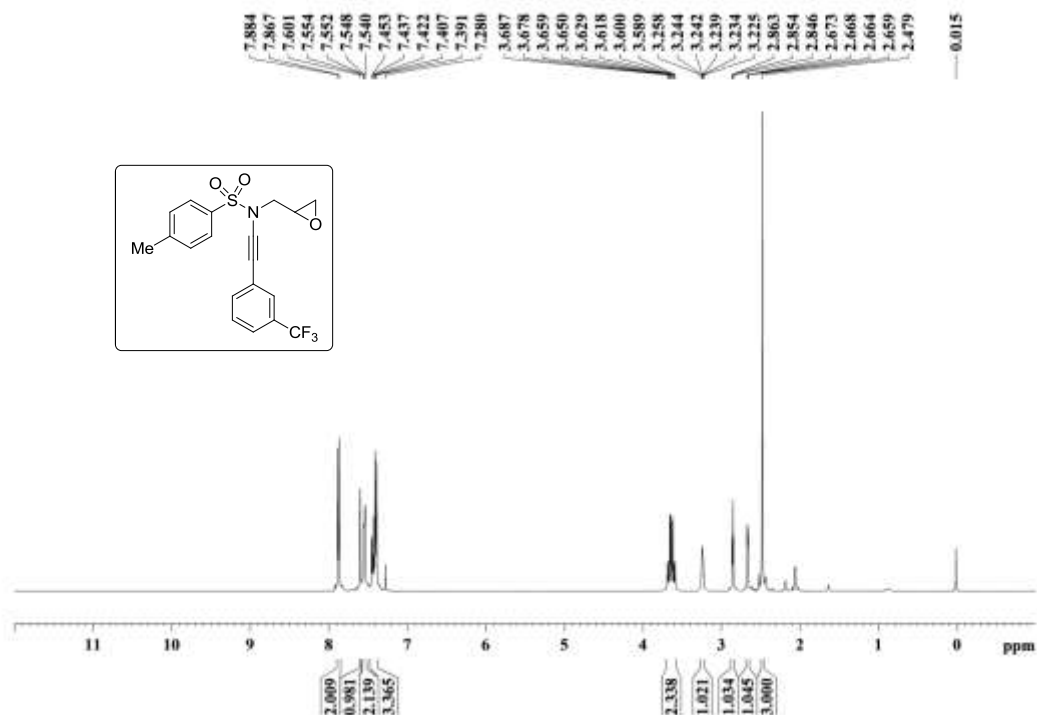

**Figure S19.** <sup>1</sup>H NMR spectrum of compound **1o**

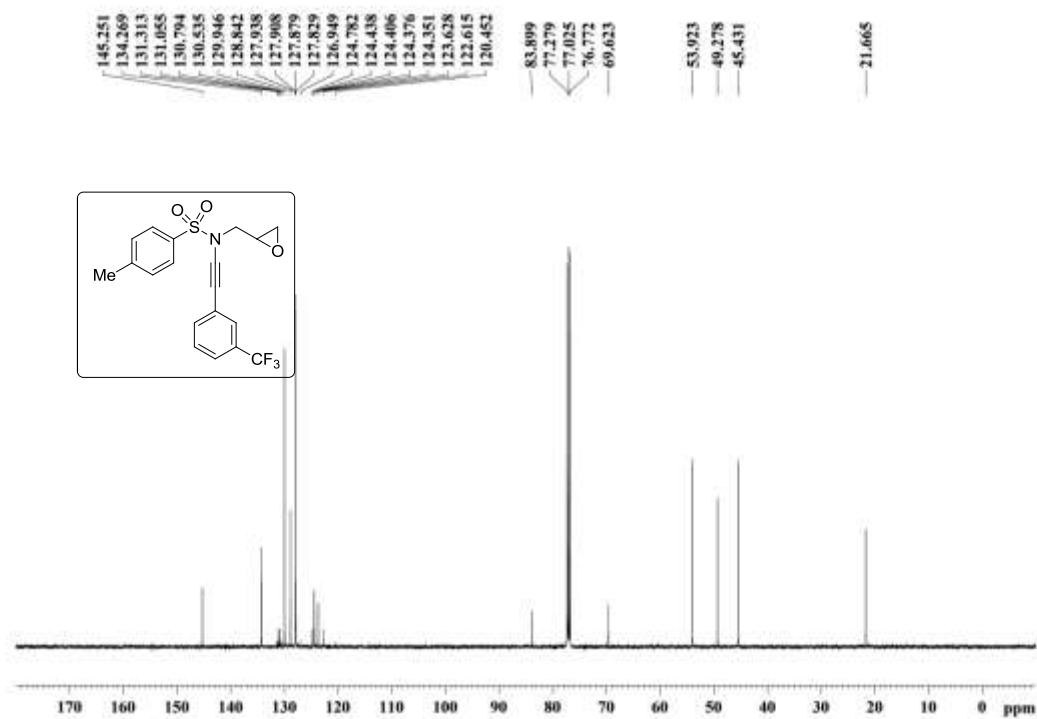

**Figure S20.** <sup>13</sup>C NMR spectrum of compound **1o**

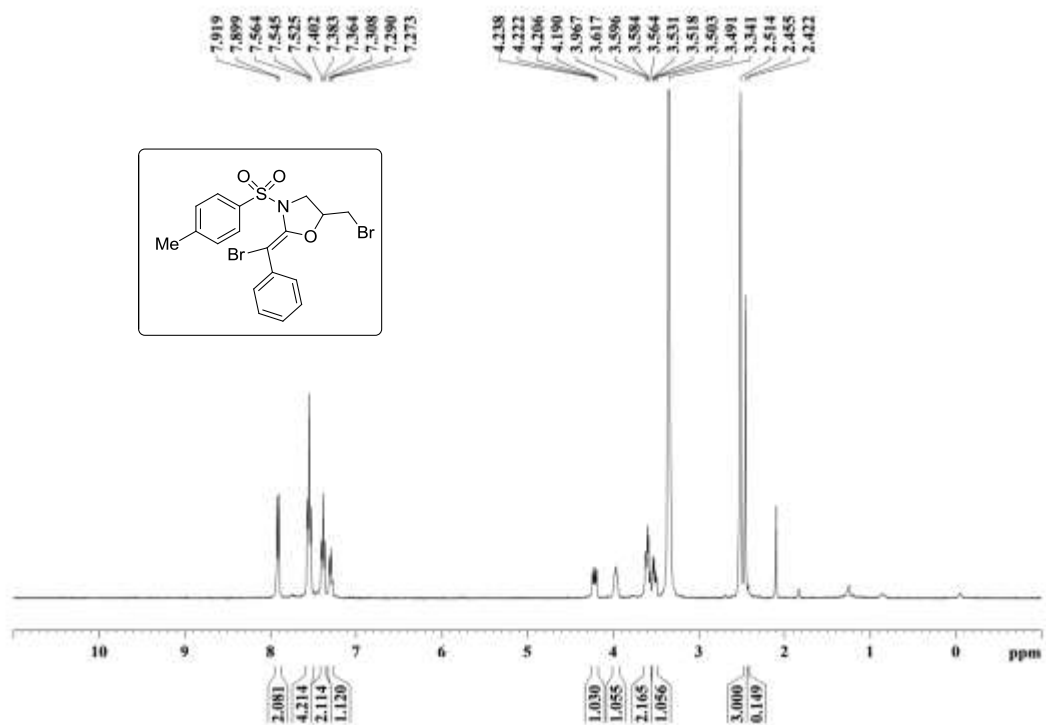

**Figure S21.** <sup>1</sup>H NMR spectrum of compound **3**

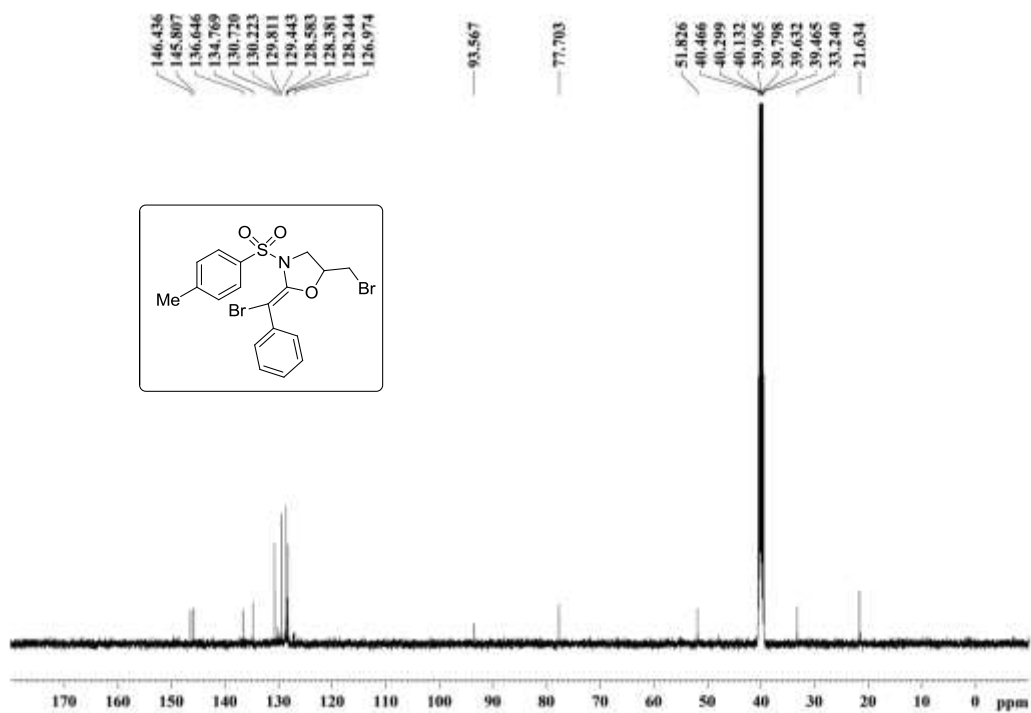

**Figure S22.** <sup>13</sup>C NMR spectrum of compound **3**

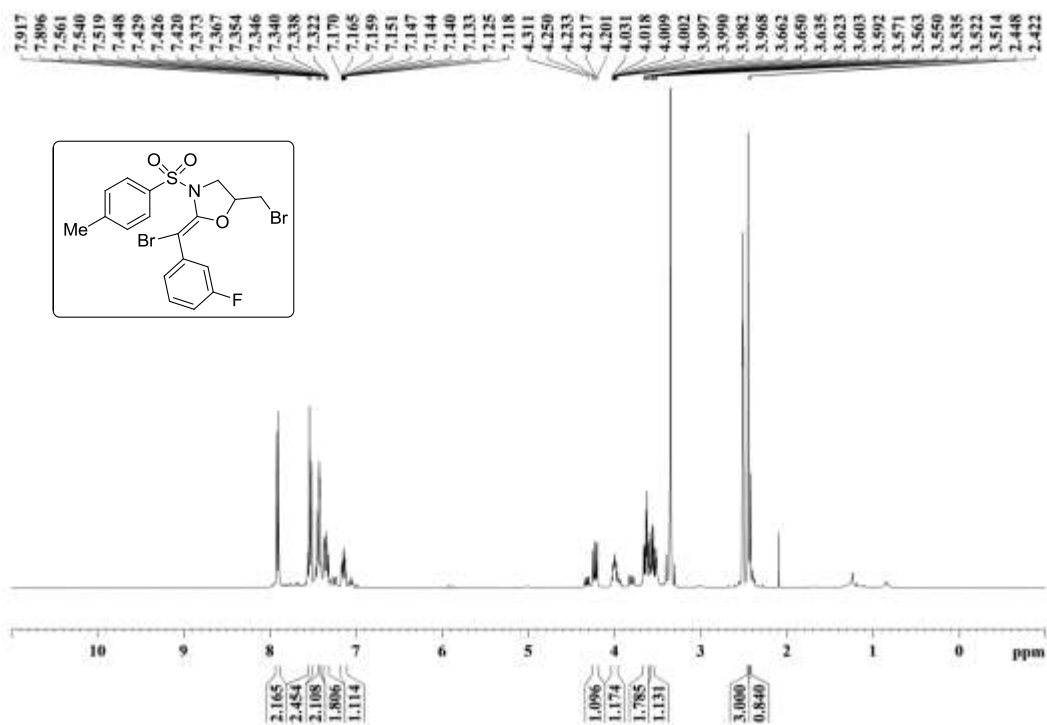

**Figure S23.** <sup>1</sup>H NMR spectrum of compound **4**

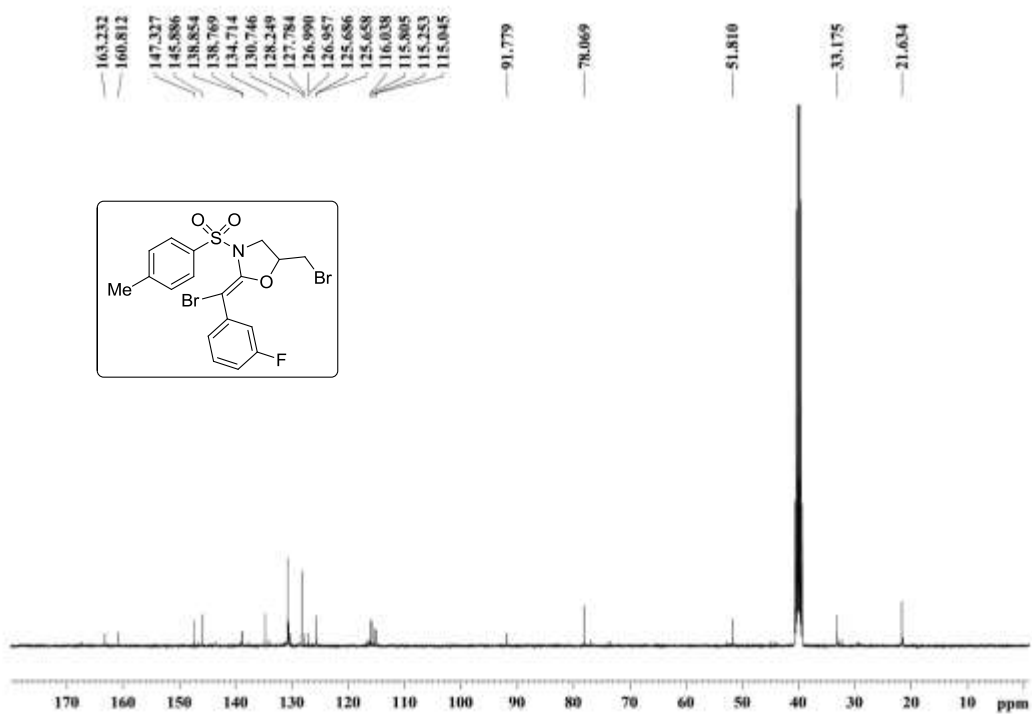

**Figure S24.** <sup>13</sup>C NMR spectrum of compound **4**

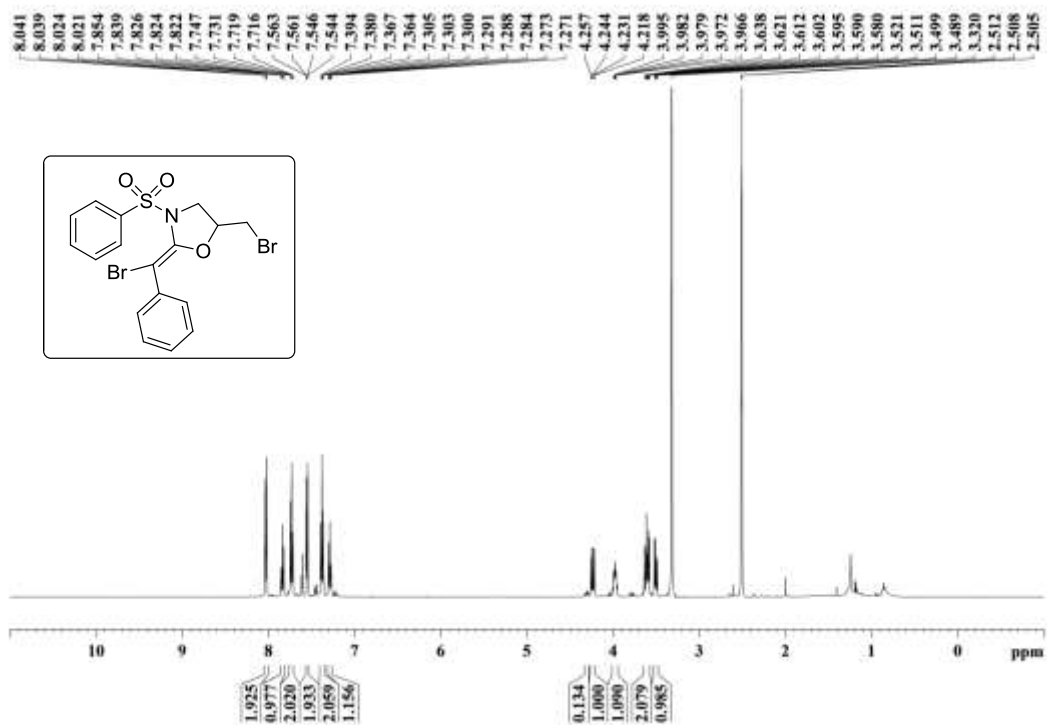

**Figure S25.** <sup>1</sup>H NMR spectrum of compound 5

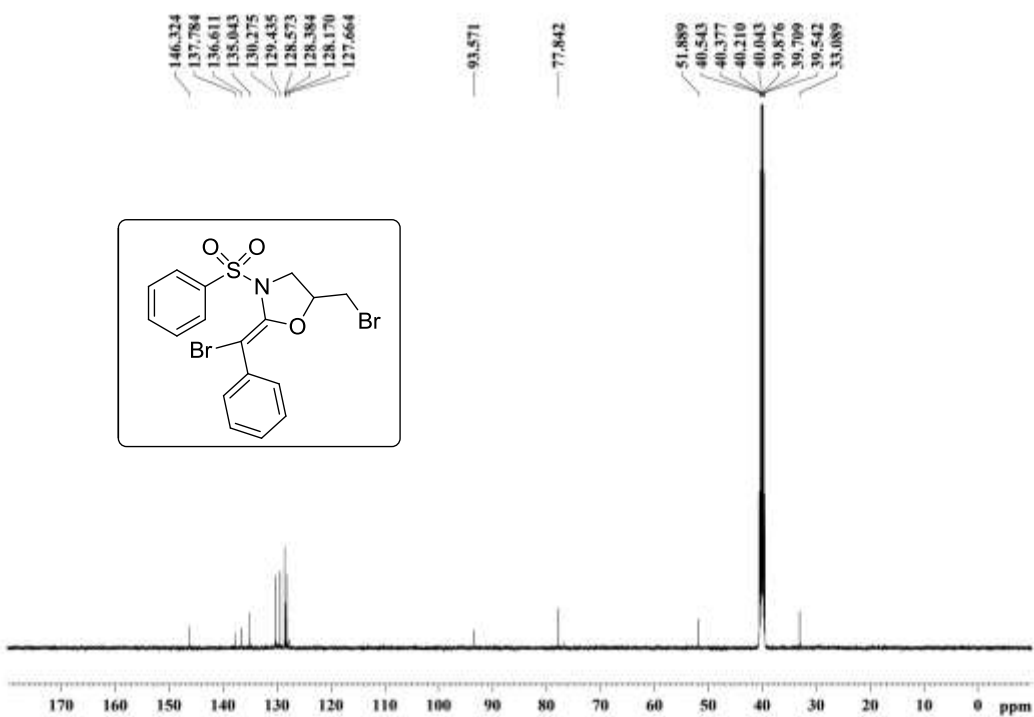

**Figure S26.** <sup>13</sup>C NMR spectrum of compound 5

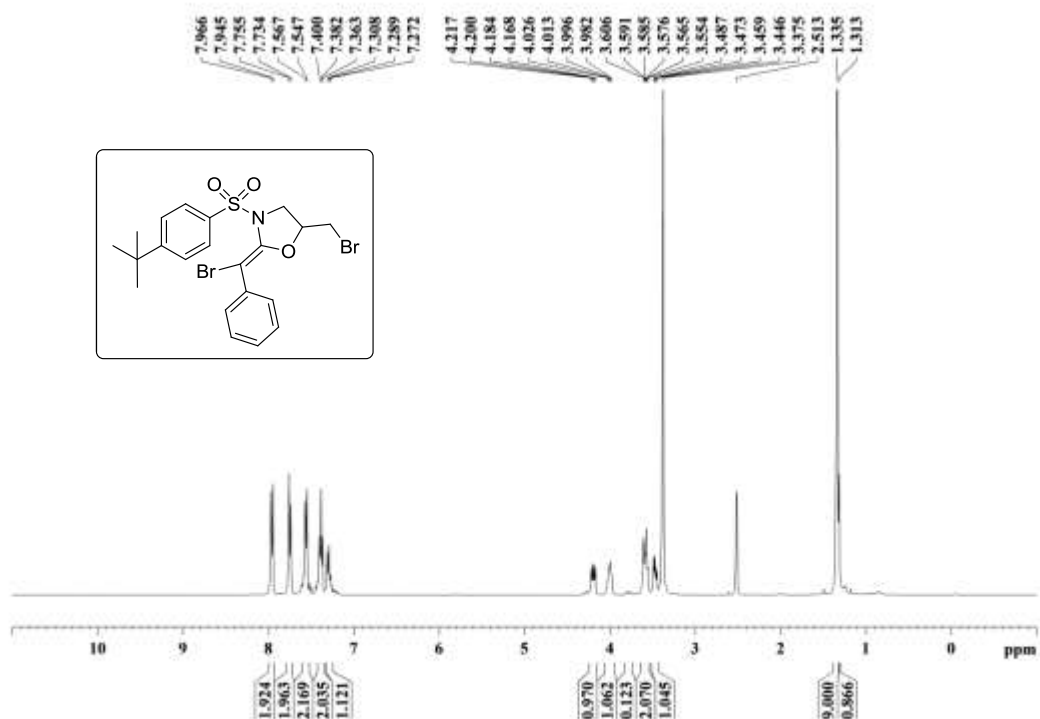

**Figure S27.** <sup>1</sup>H NMR spectrum of compound 6

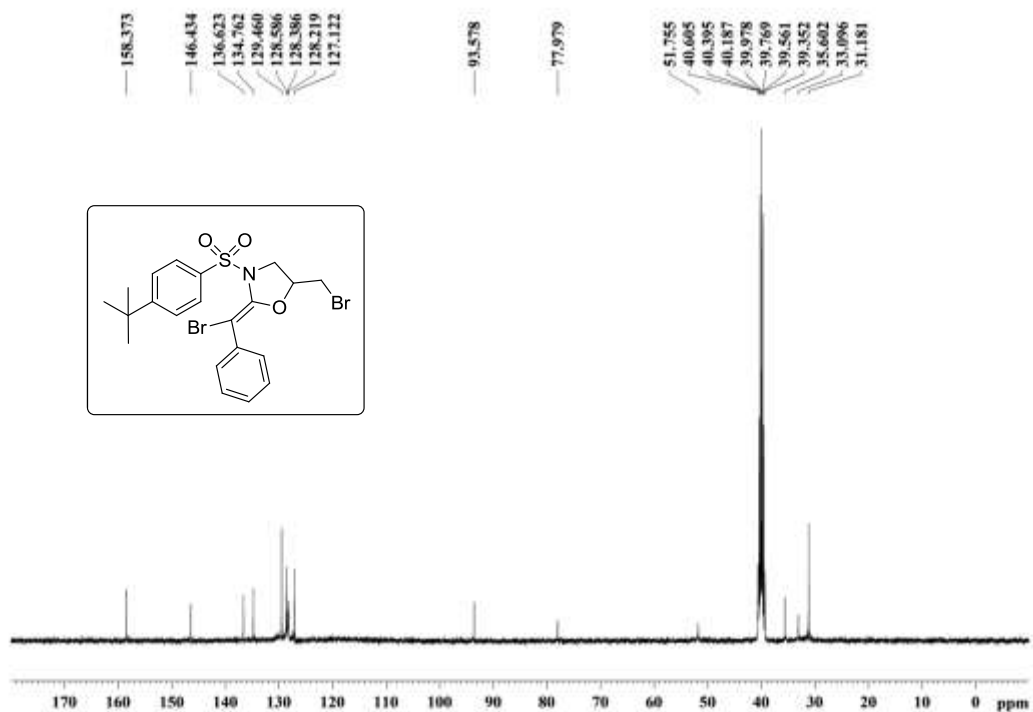

**Figure S28.** <sup>13</sup>C NMR spectrum of compound 6

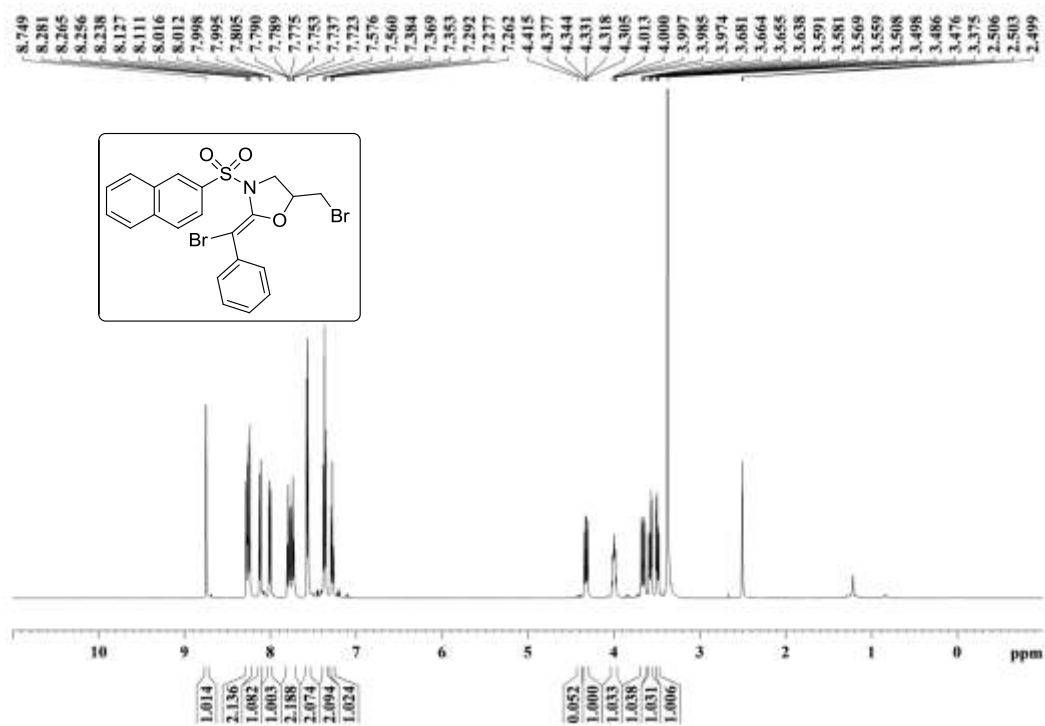

Figure S29. <sup>1</sup>H NMR spectrum of compound 7

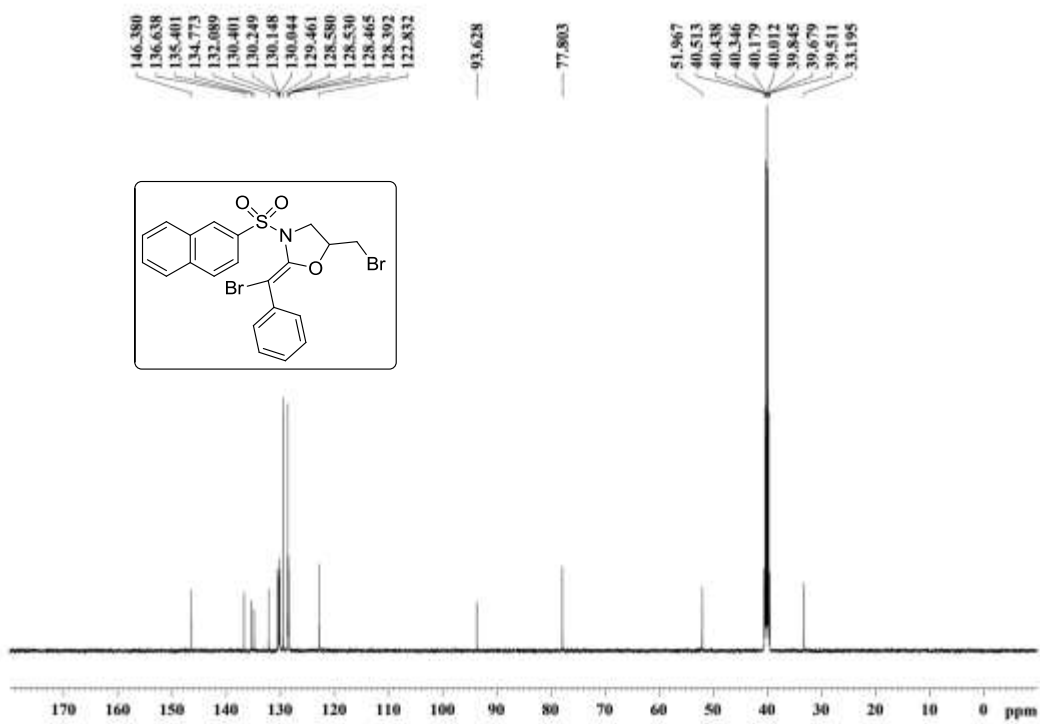

Figure S30. <sup>13</sup>C NMR spectrum of compound 7

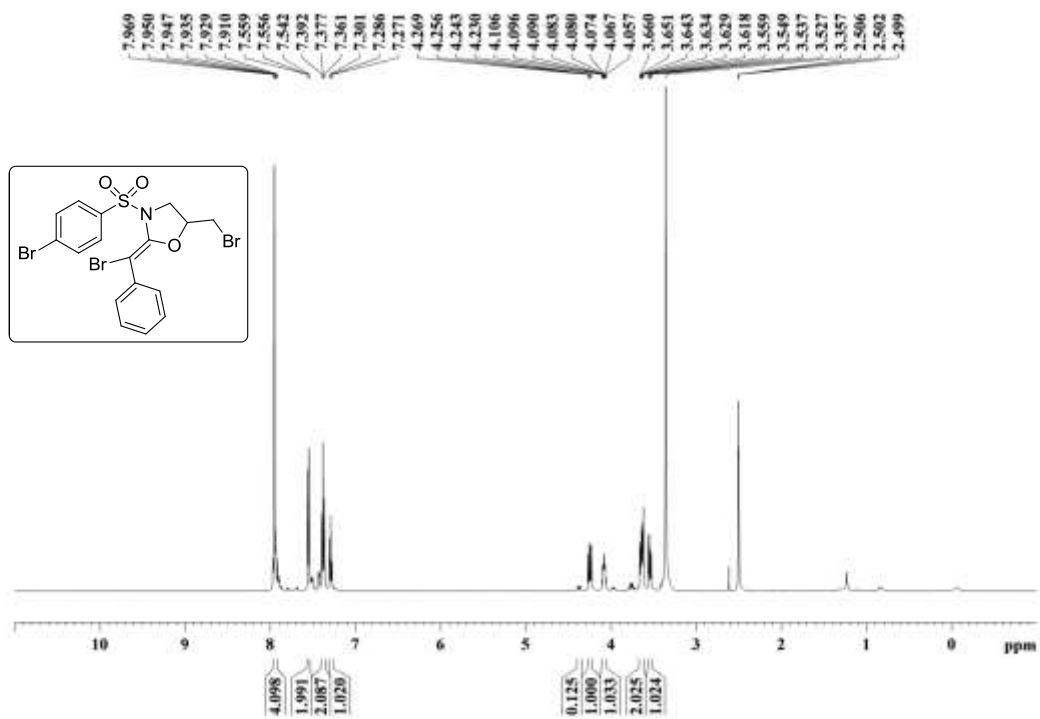

**Figure S31.** <sup>1</sup>H NMR spectrum of compound **8**

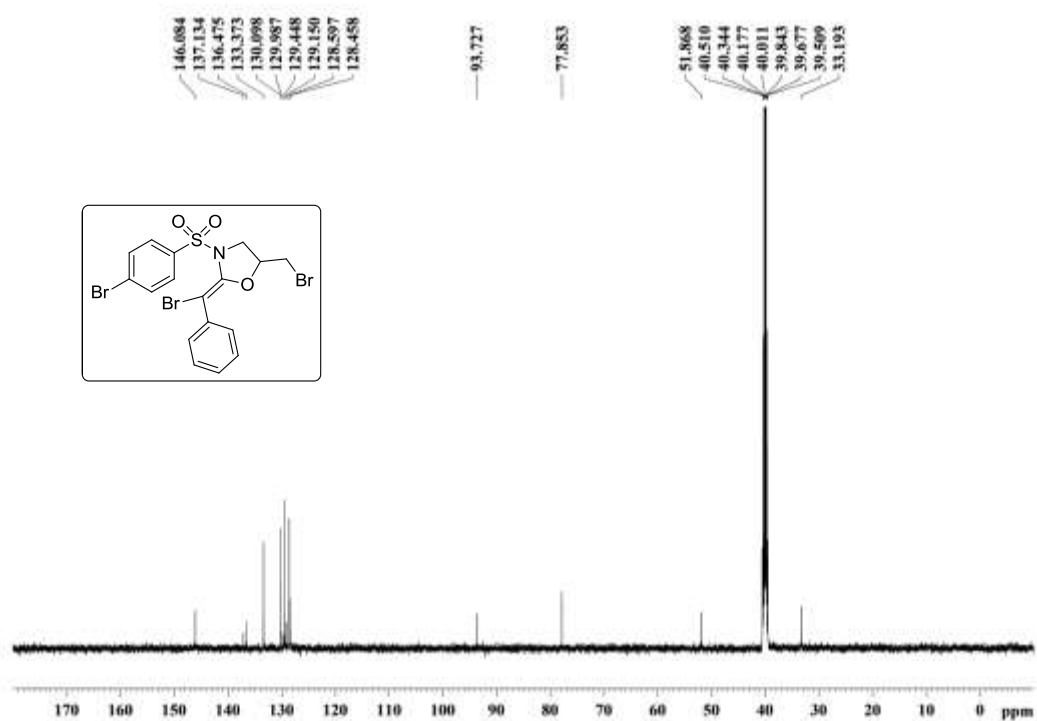

**Figure S32.** <sup>13</sup>C NMR spectrum of compound **8**

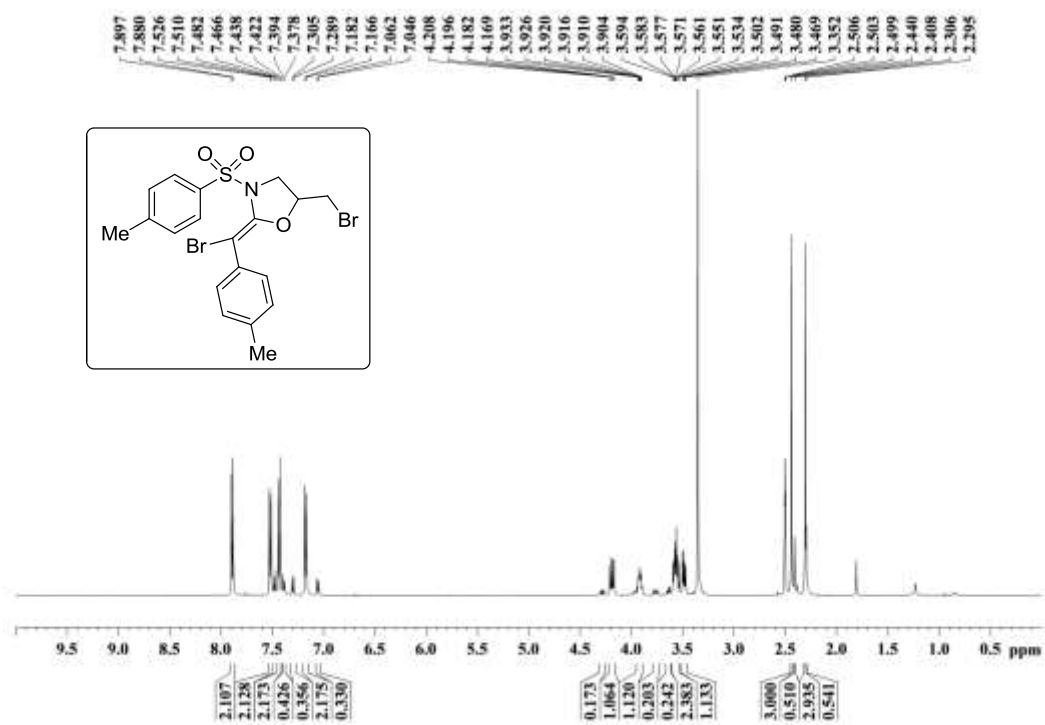

**Figure S33.** <sup>1</sup>H NMR spectrum of compound 9

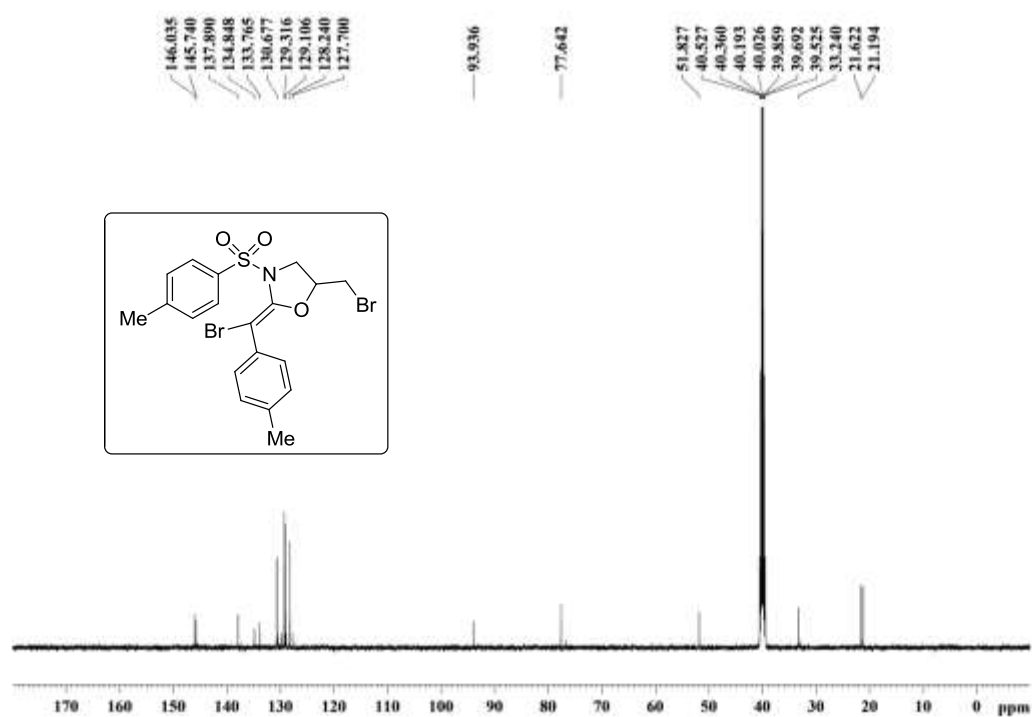

**Figure S34.** <sup>13</sup>C NMR spectrum of compound 9

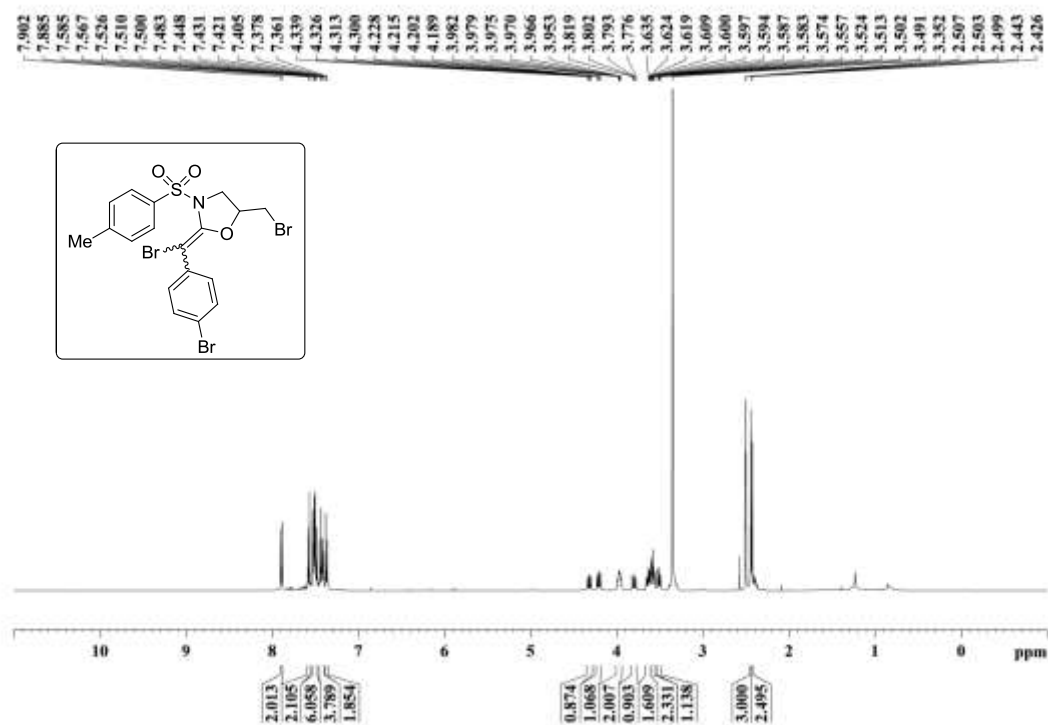

Figure S35. <sup>1</sup>H NMR spectrum of compound 10

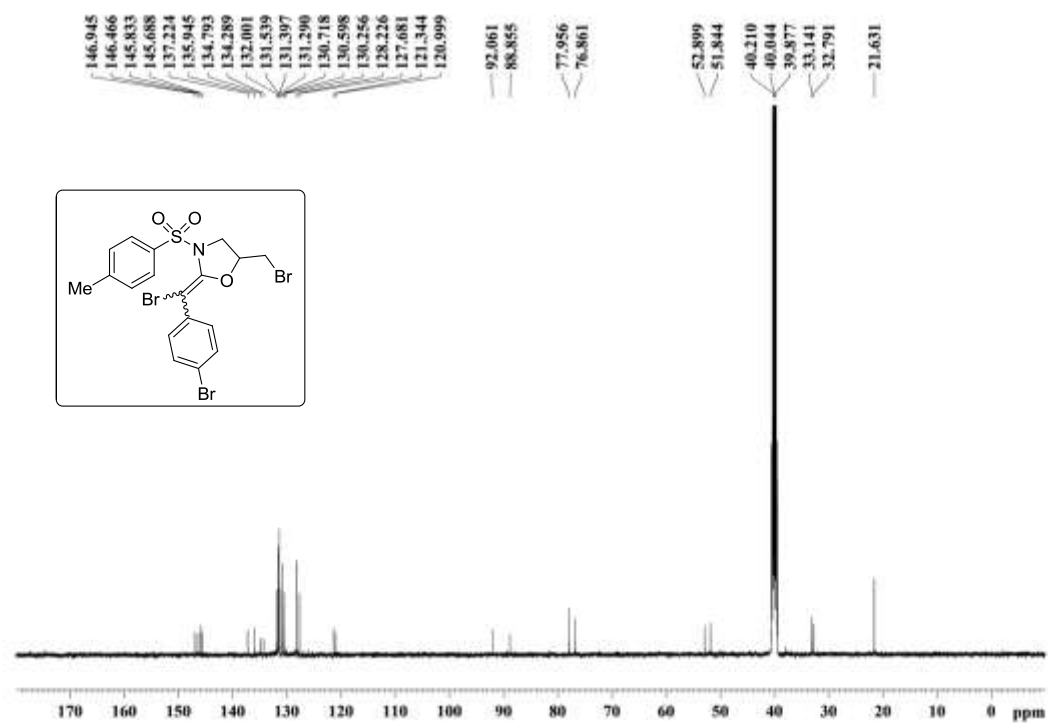

Figure S36. <sup>13</sup>C NMR spectrum of compound 10

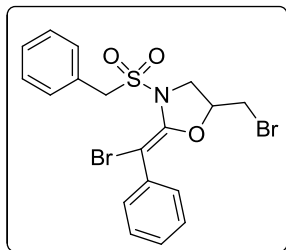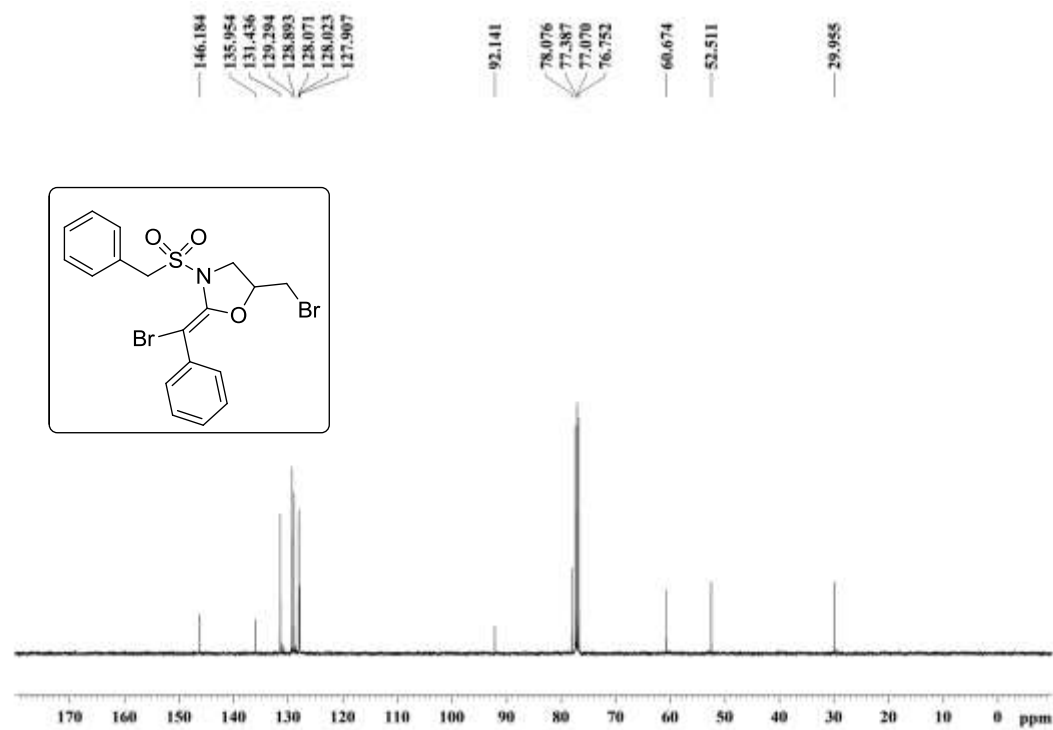

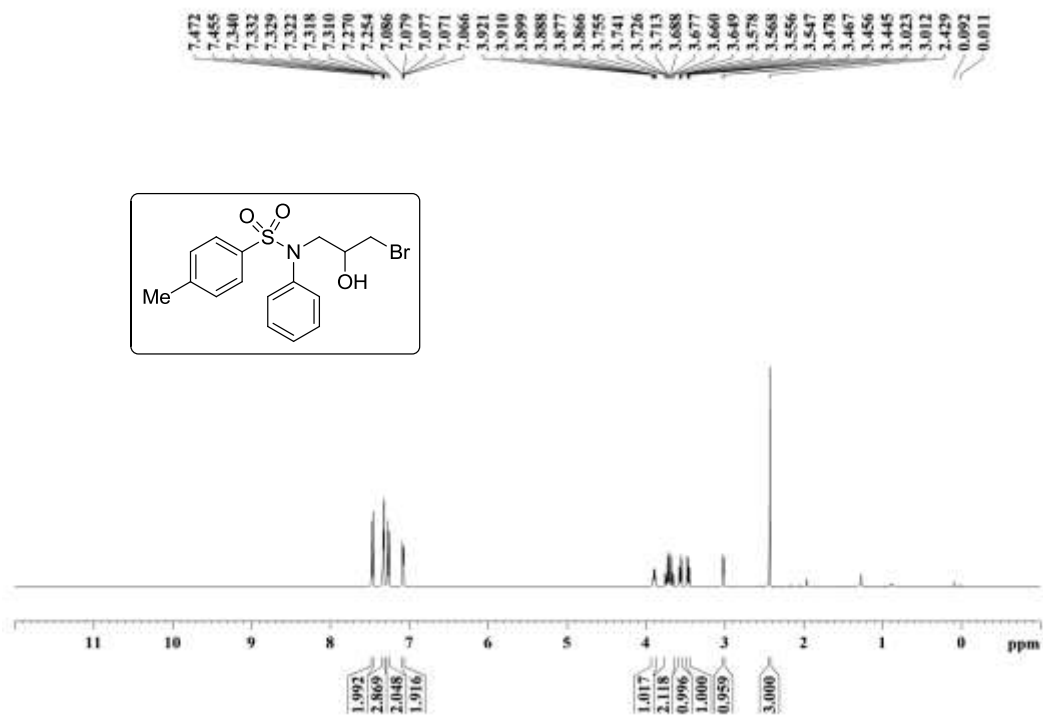

**Figure S39.** <sup>1</sup>H NMR spectrum of compound **12**

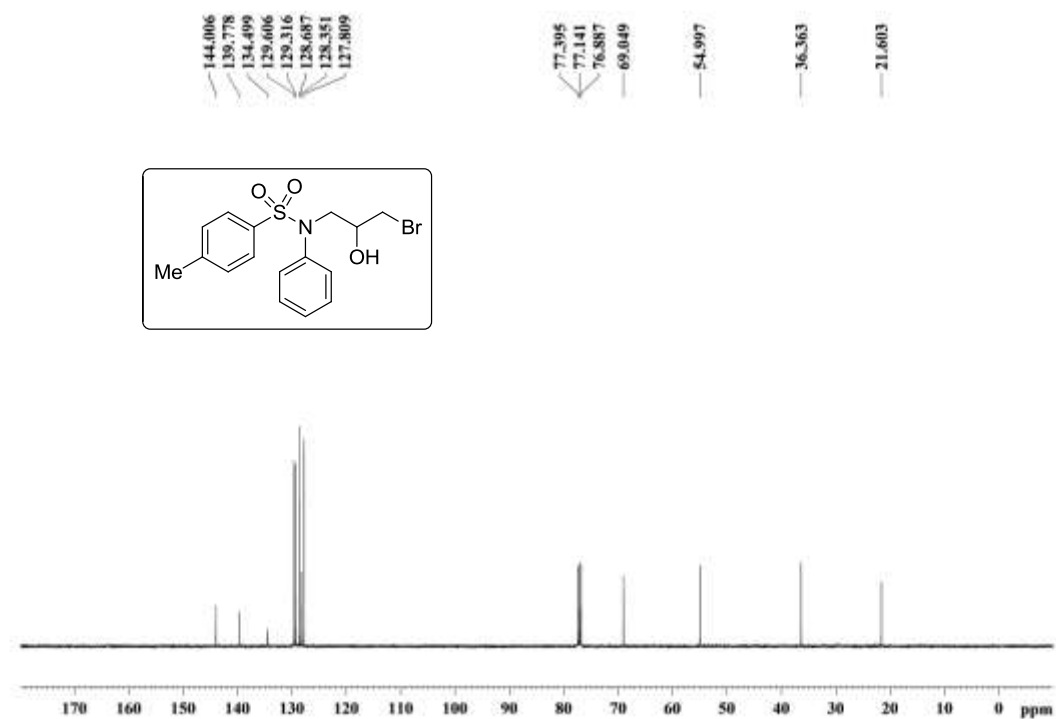

**Figure S40.** <sup>13</sup>C NMR spectrum of compound **12**

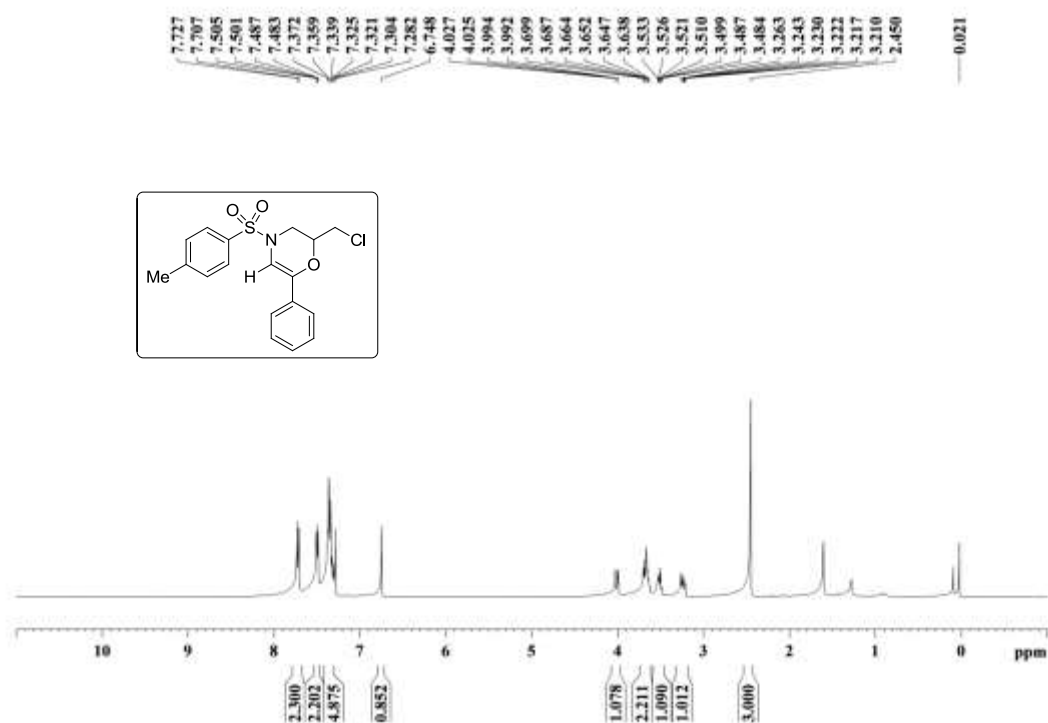

Figure S41. <sup>1</sup>H NMR spectrum of compound 13

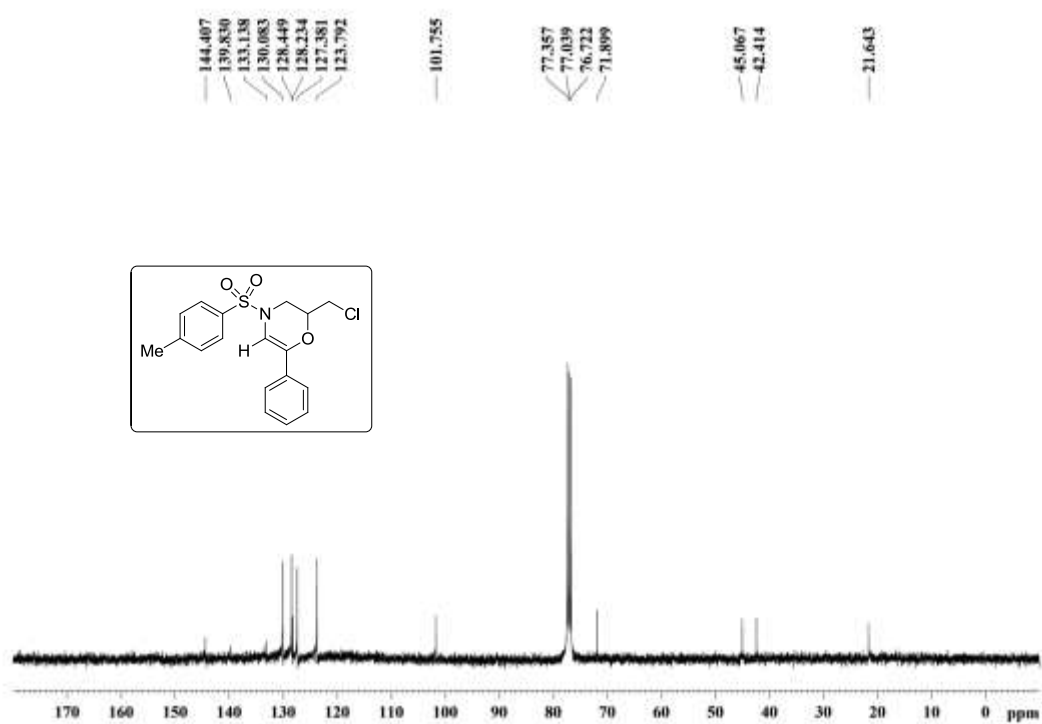

Figure S42. <sup>13</sup>C NMR spectrum of compound 13

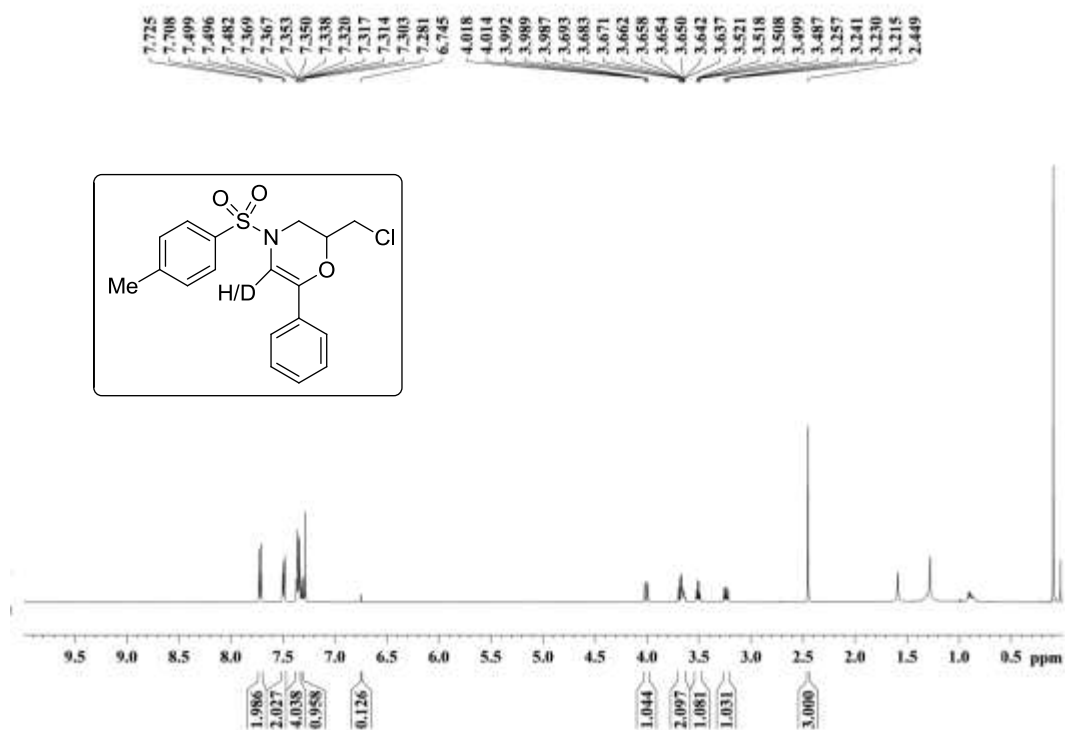

**Figure S43.** <sup>1</sup>H NMR spectrum of compound **13'**

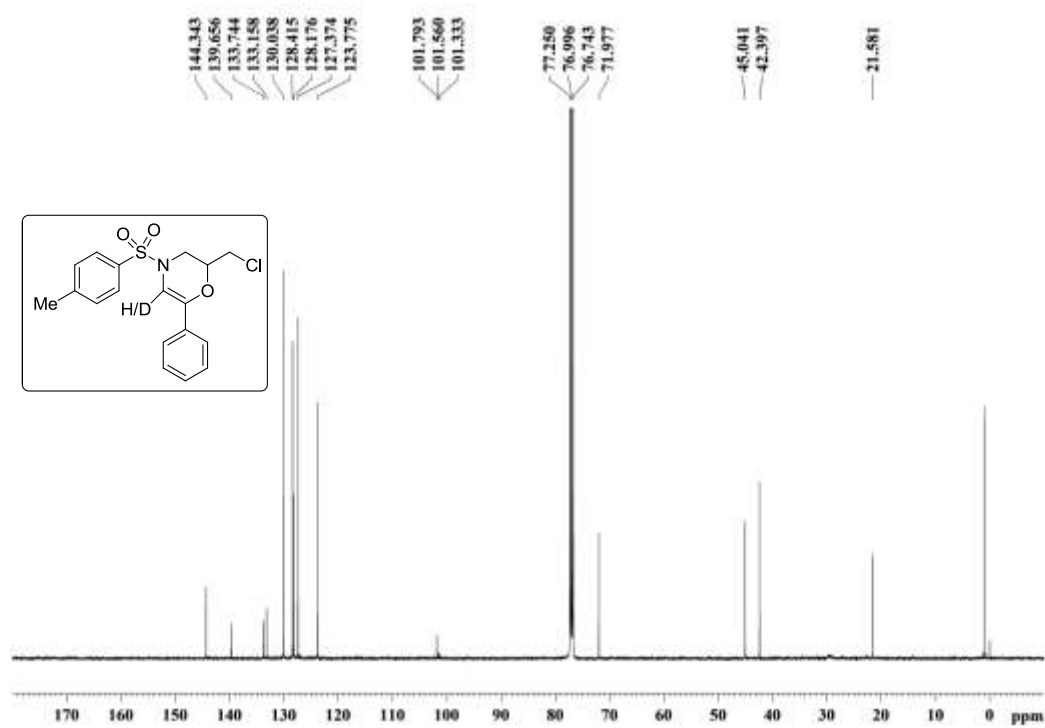

**Figure S44.** <sup>13</sup>C NMR spectrum of compound **13'**

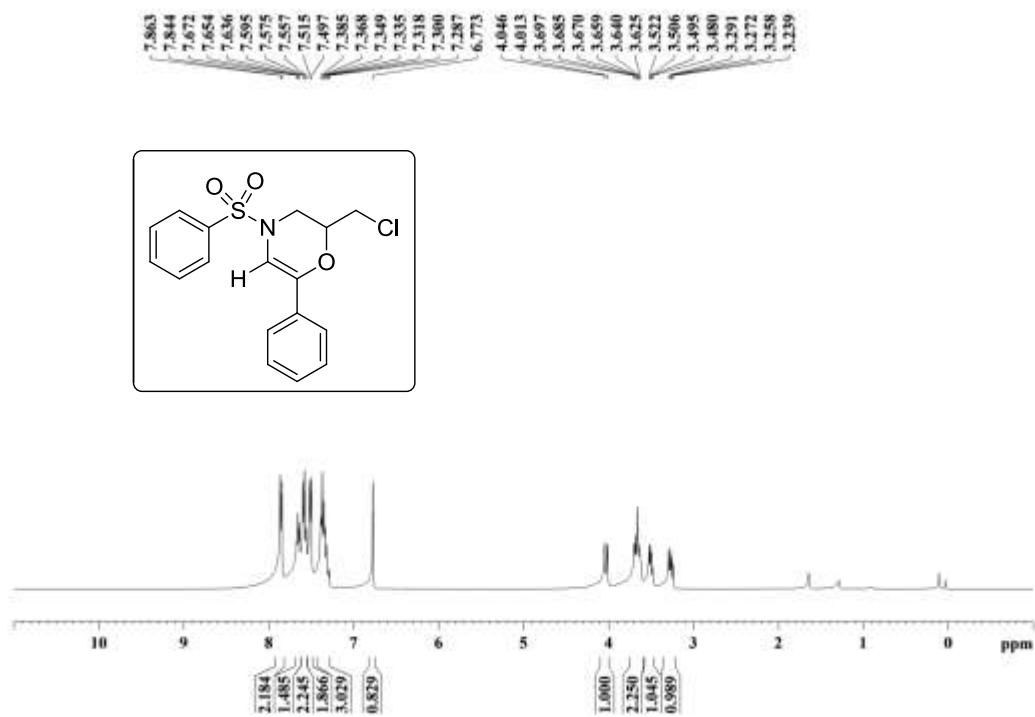

**Figure S45.** <sup>1</sup>H NMR spectrum of compound **14**

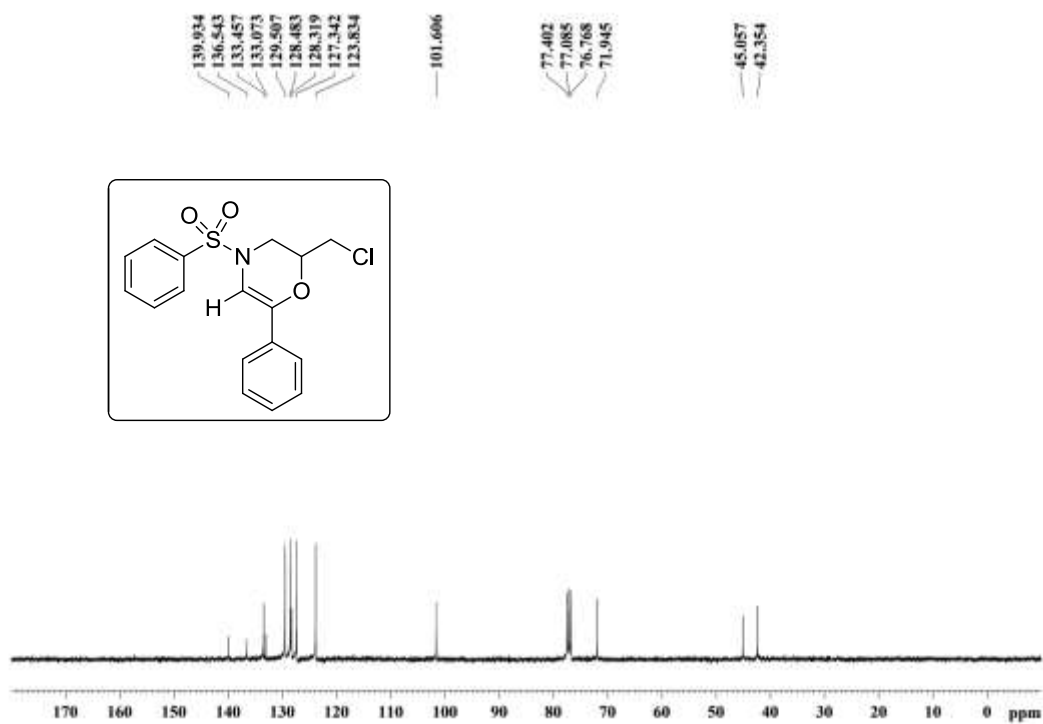

**Figure S46.** <sup>13</sup>C NMR spectrum of compound **14**

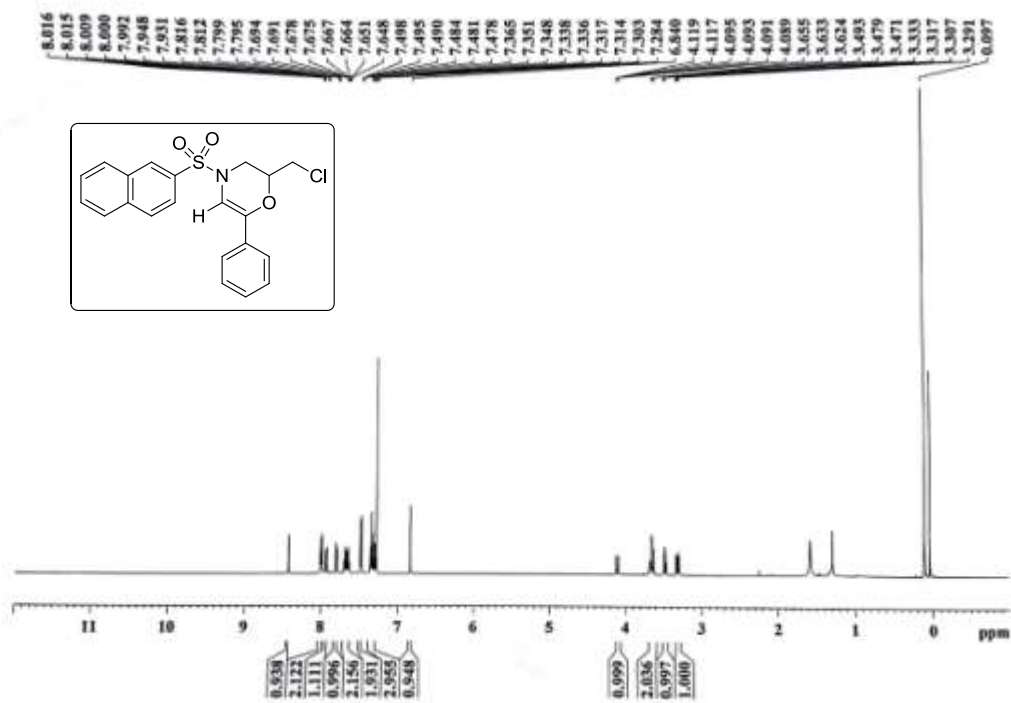

Figure S47. <sup>1</sup>H NMR spectrum of compound 15

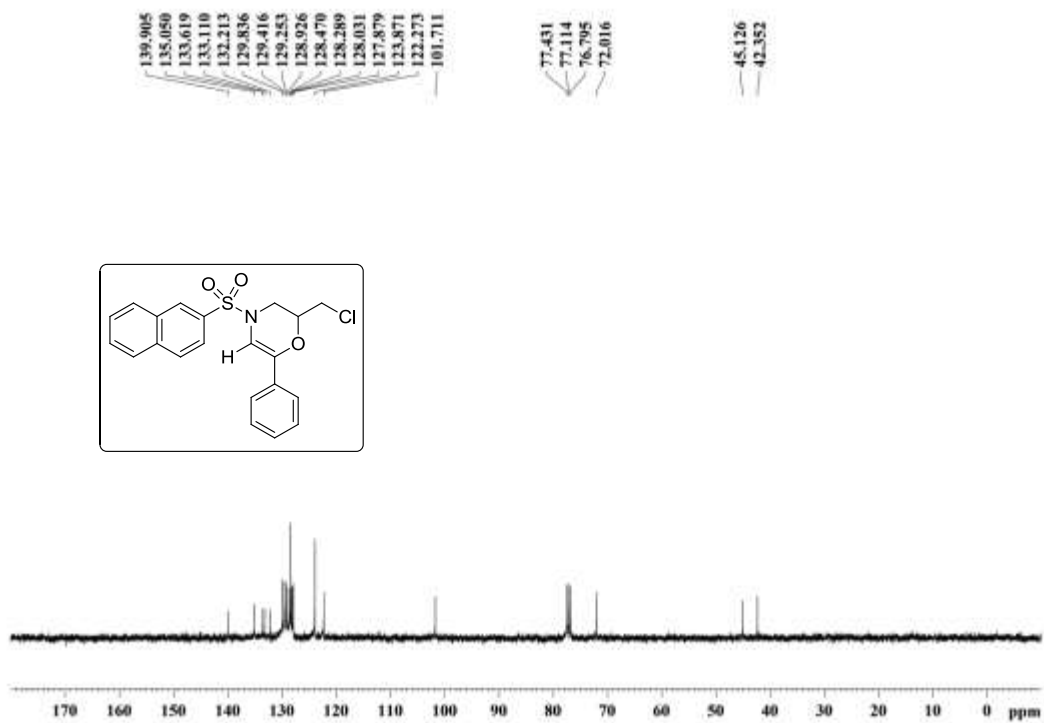

Figure S48. <sup>13</sup>C NMR spectrum of compound 15

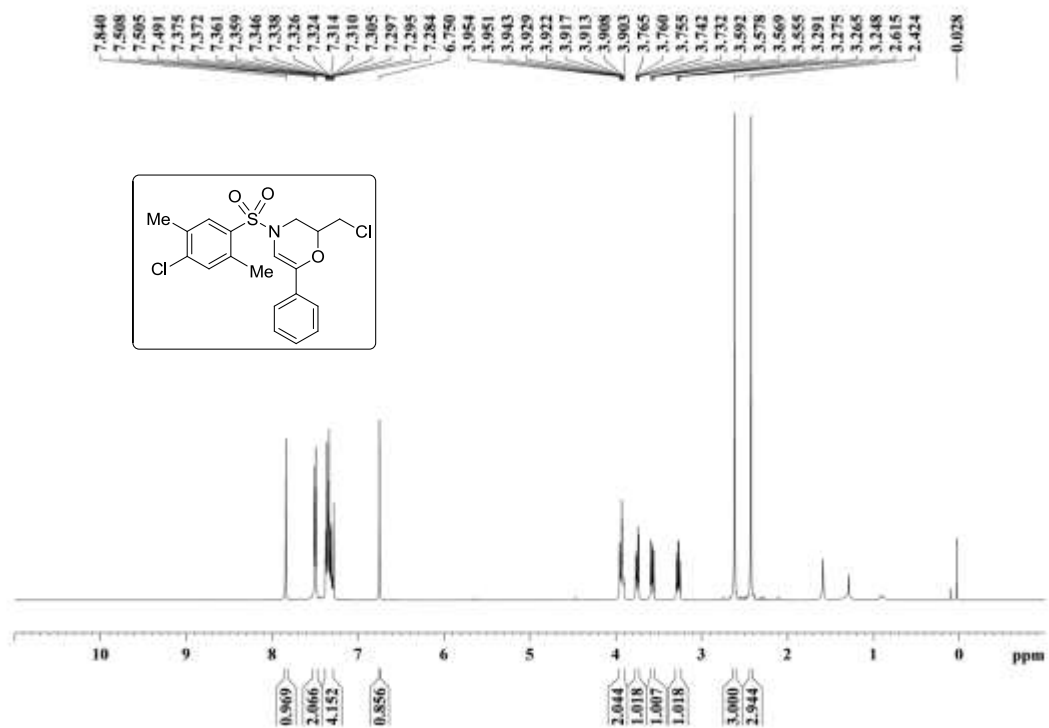

**Figure S49.** <sup>1</sup>H NMR spectrum of compound **16**

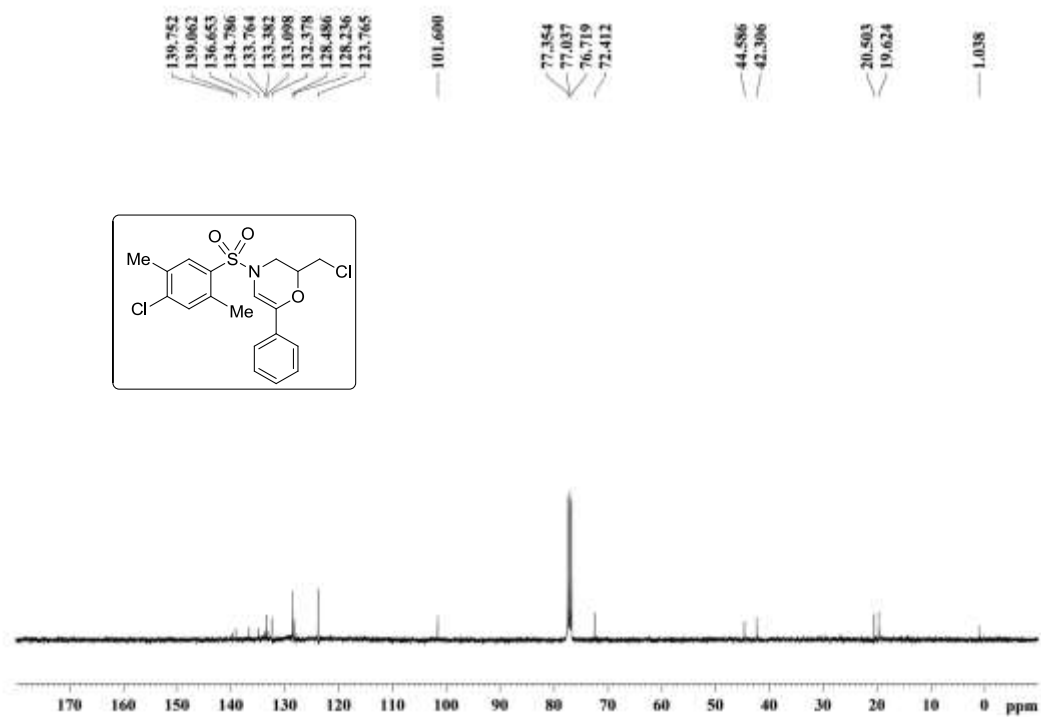

**Figure S50.** <sup>13</sup>C NMR spectrum of compound **16**

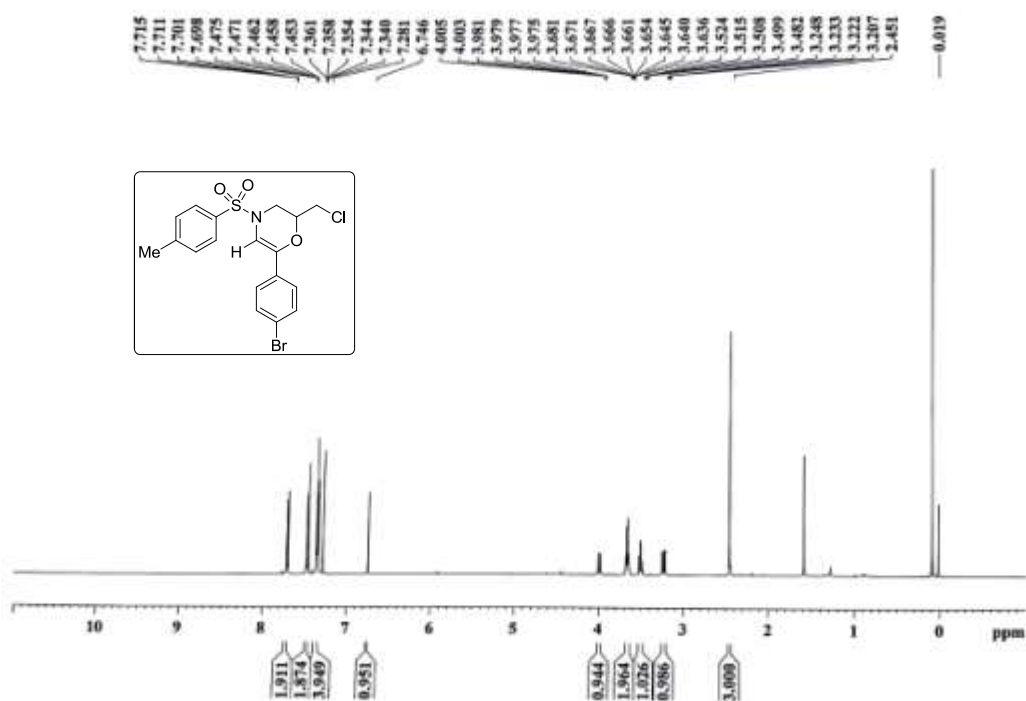

Figure S51. <sup>1</sup>H NMR spectrum of compound 17

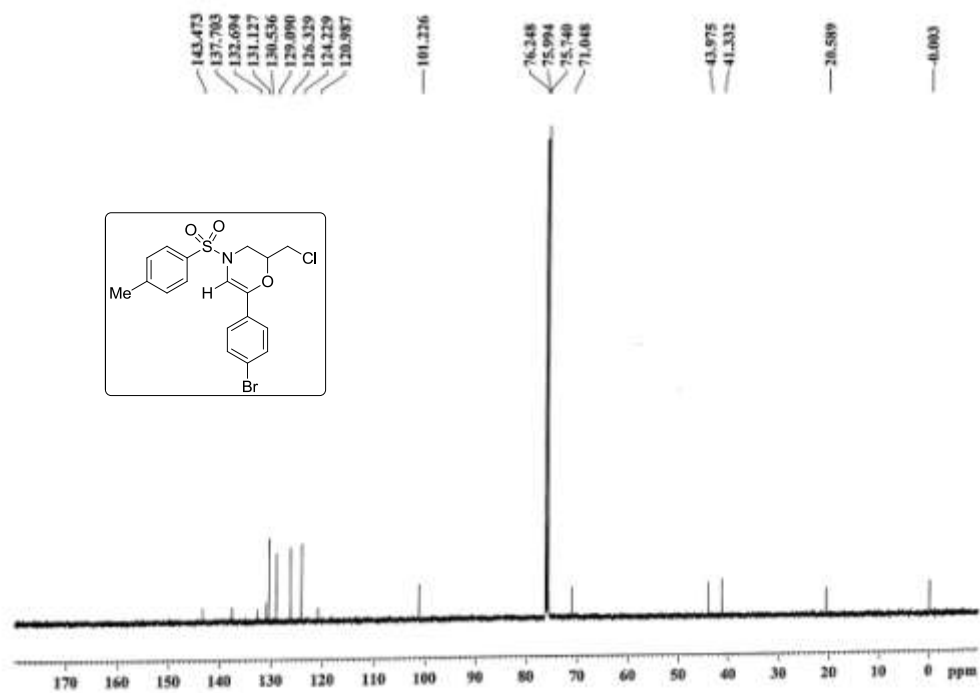

Figure S52. <sup>13</sup>C NMR spectrum of compound 17

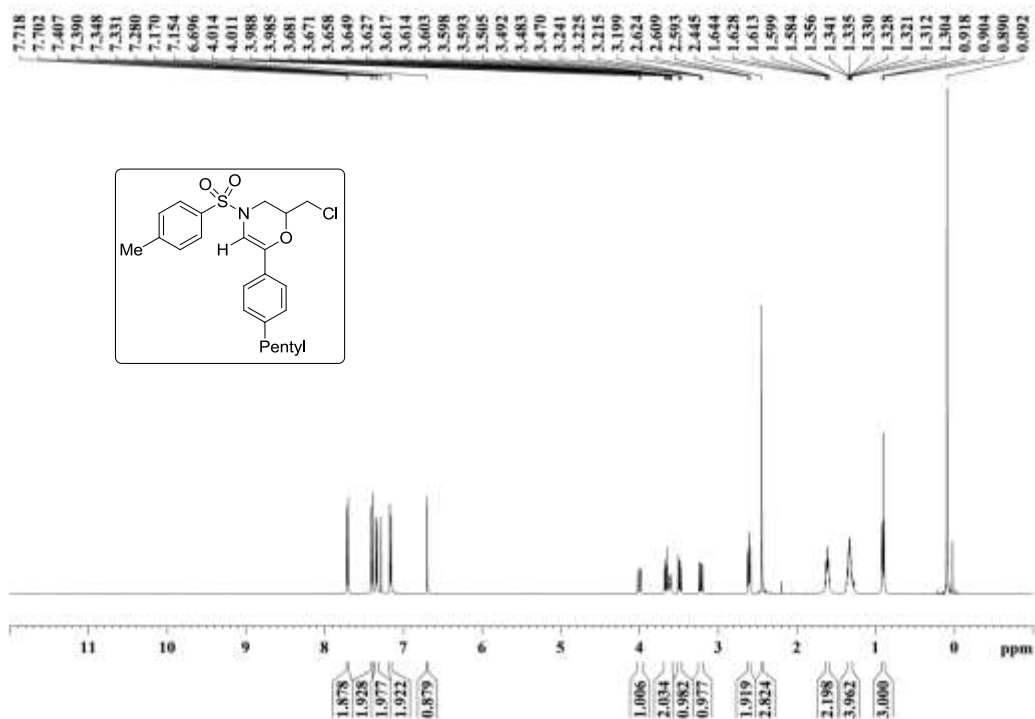

Figure S53. <sup>1</sup>H NMR spectrum of compound 18

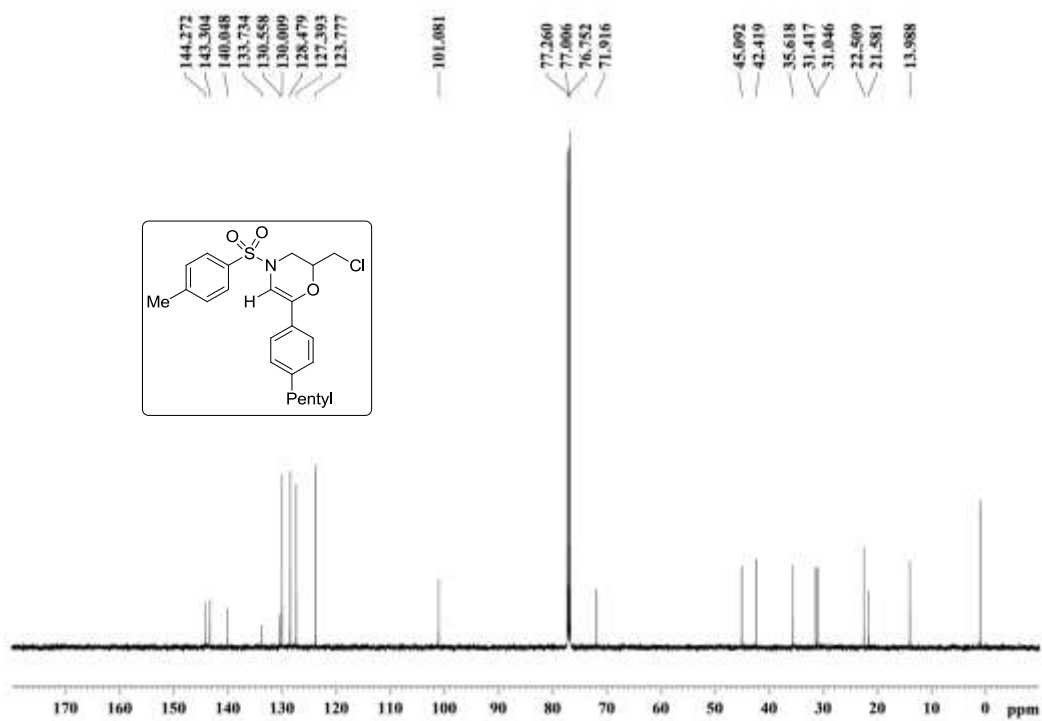

Figure S54. <sup>13</sup>C NMR spectrum of compound 18

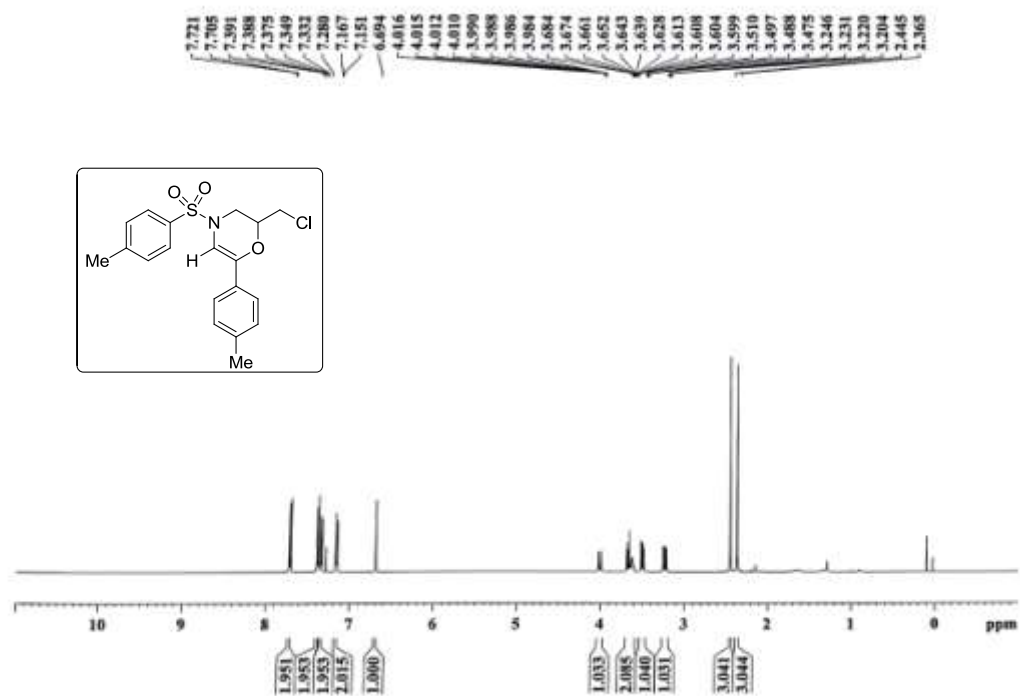

**Figure S55.** <sup>1</sup>H NMR spectrum of compound 19

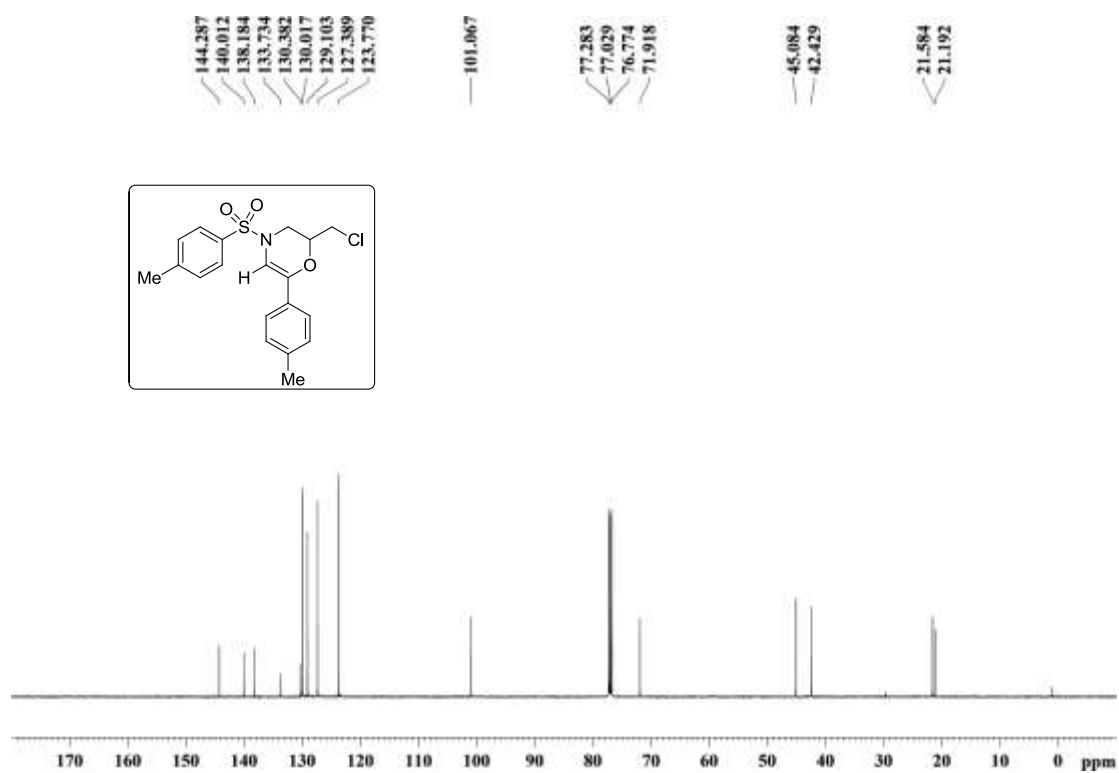

**Figure S56.** <sup>13</sup>C NMR spectrum of compound 19

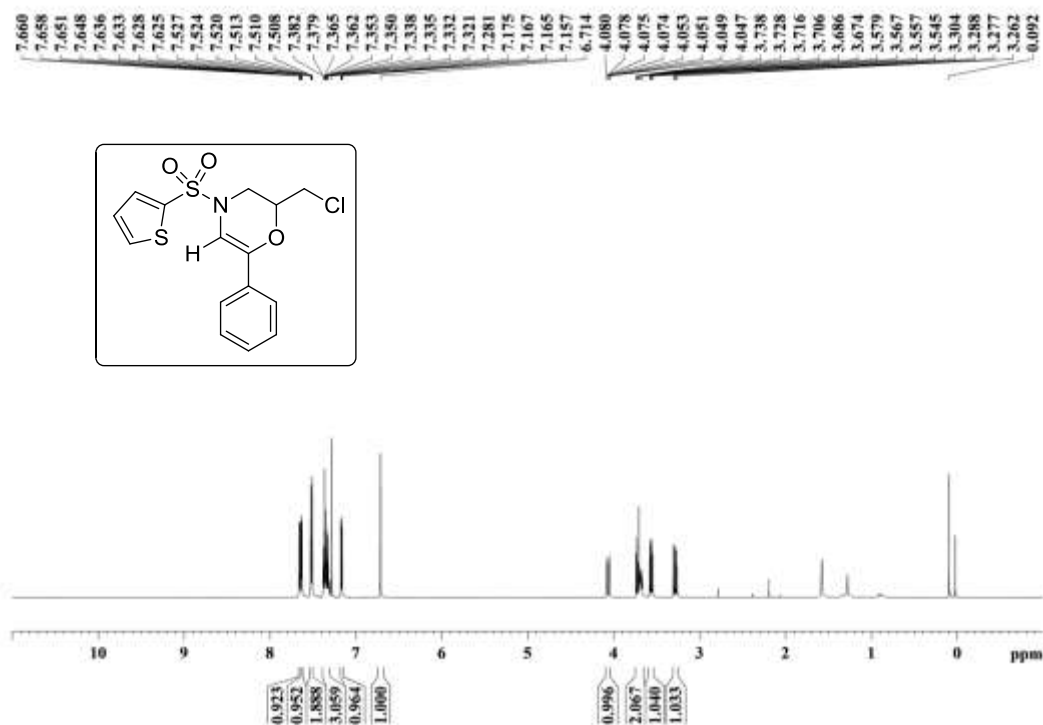

Figure S57. <sup>1</sup>H NMR spectrum of compound 20

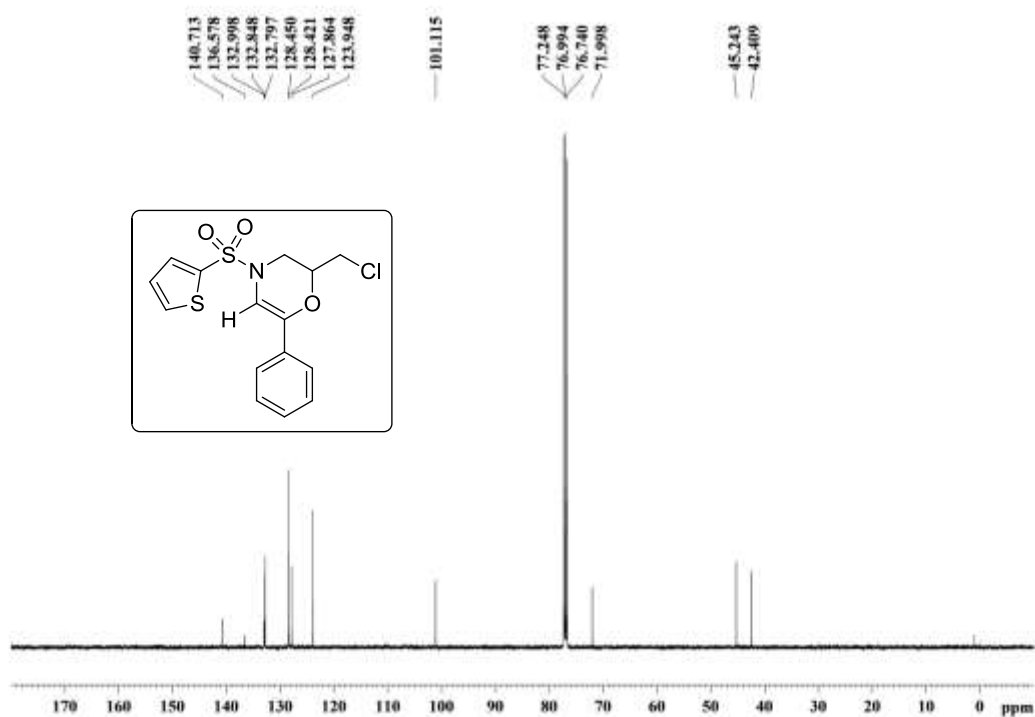

Figure S58. <sup>13</sup>C NMR spectrum of compound 20

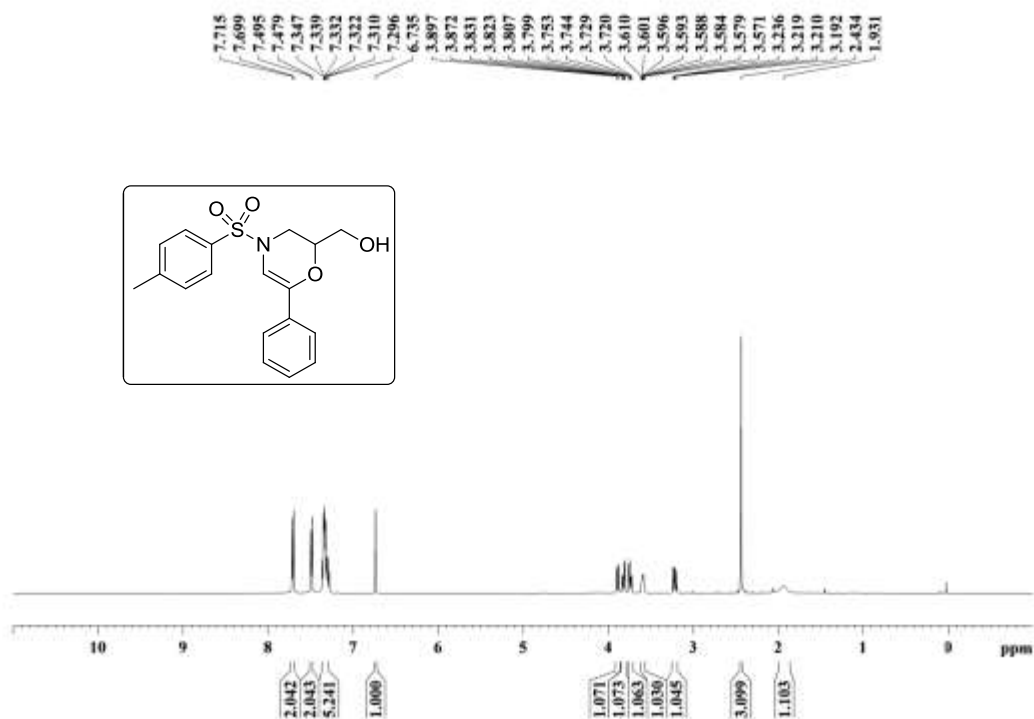

**Figure S59.** <sup>1</sup>H NMR spectrum of compound **21**

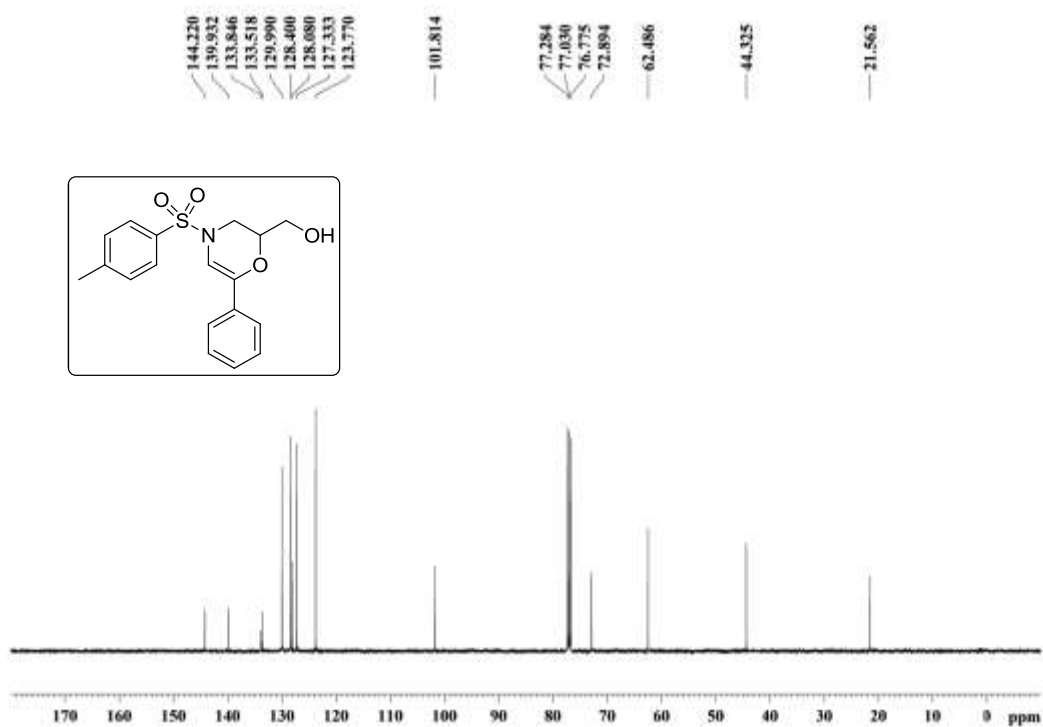

**Figure S60.** <sup>13</sup>C NMR spectrum of compound **21**

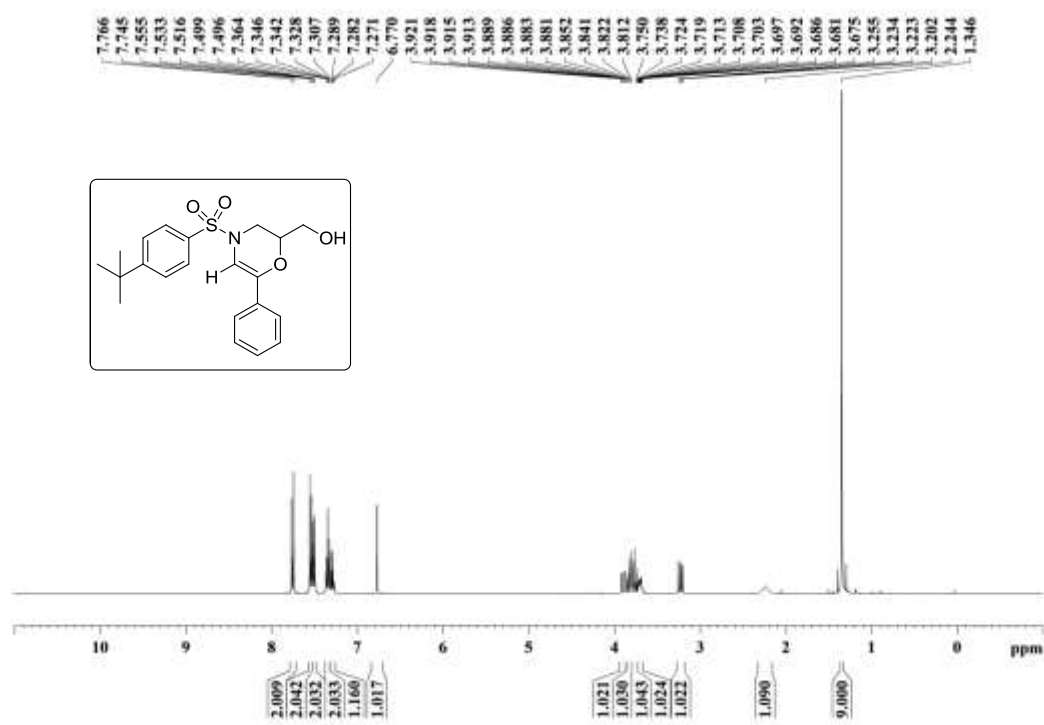

**Figure S61.** <sup>1</sup>H NMR spectrum of compound 22

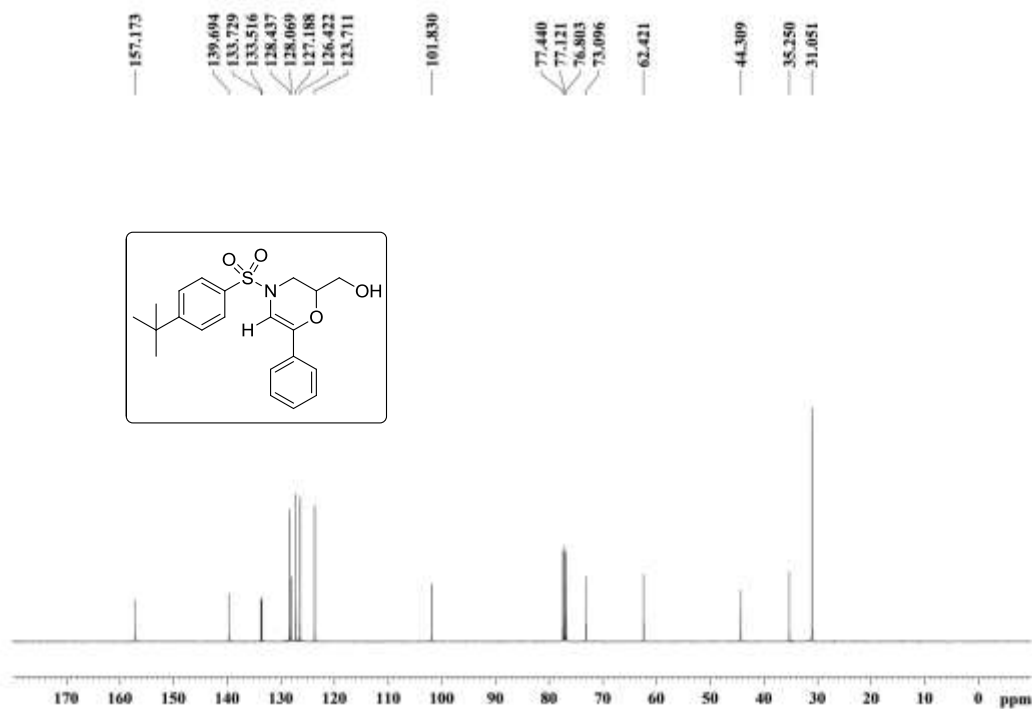

**Figure S62.** <sup>13</sup>C NMR spectrum of compound 22

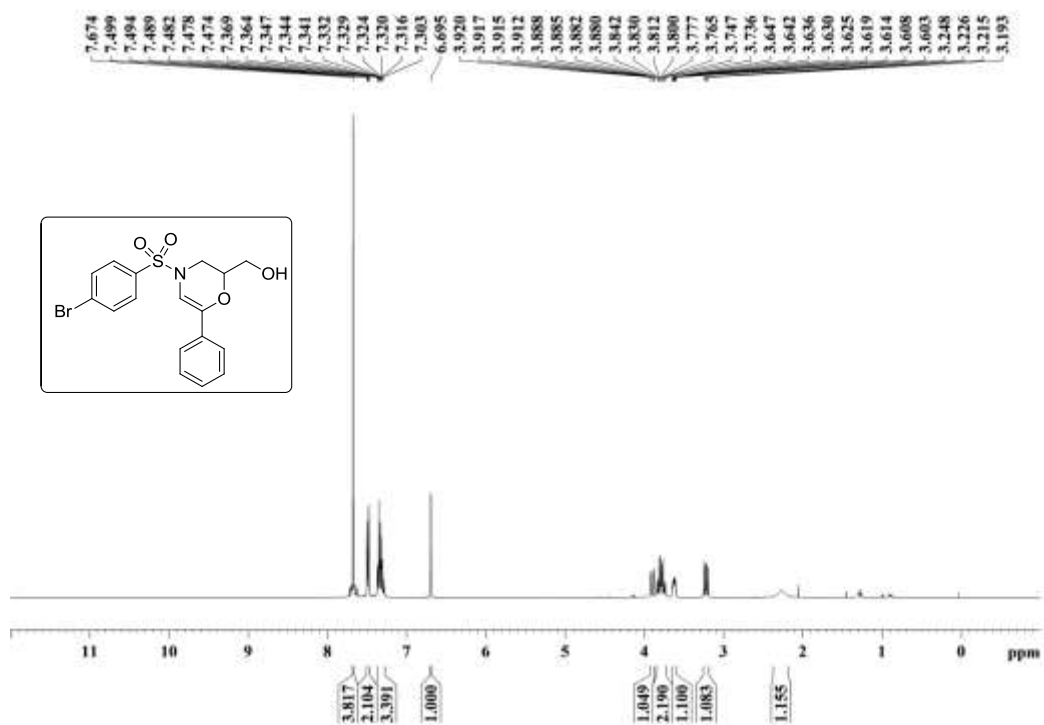

Figure S63. <sup>1</sup>H NMR spectrum of compound 23

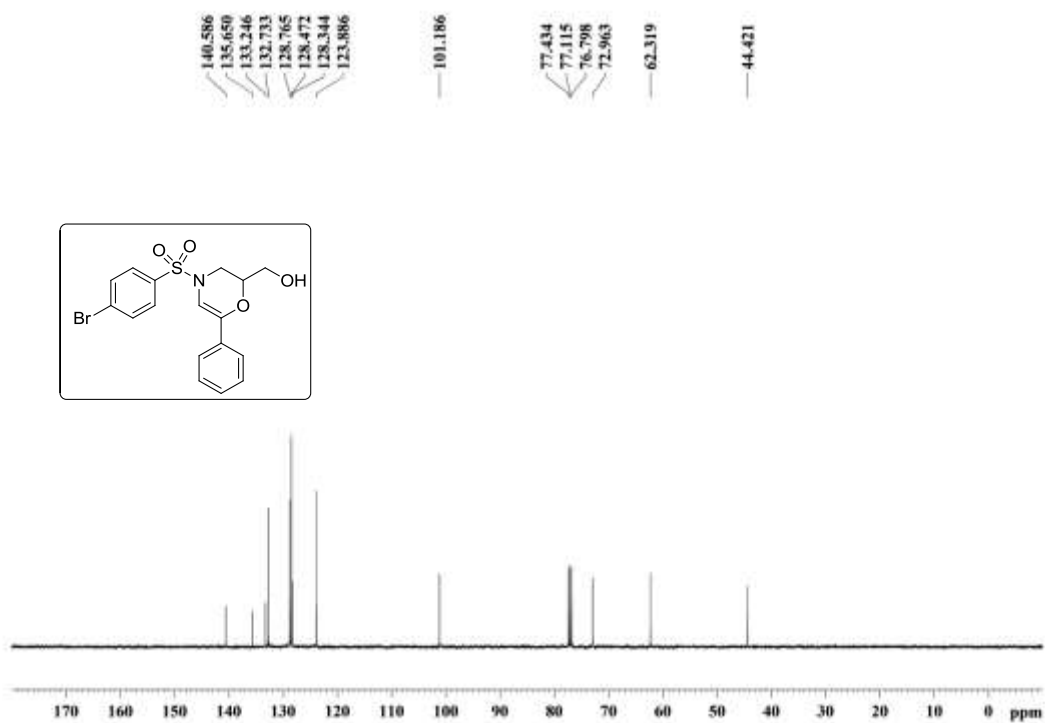

Figure S64. <sup>13</sup>C NMR spectrum of compound 23

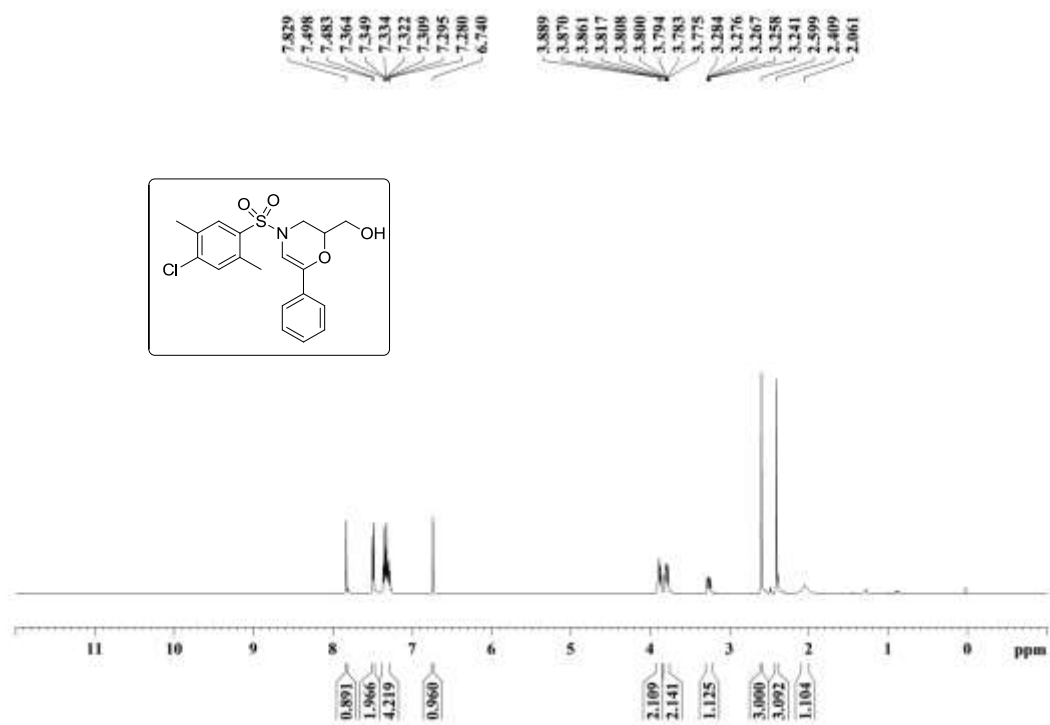

**Figure S65.** <sup>1</sup>H NMR spectrum of compound 24

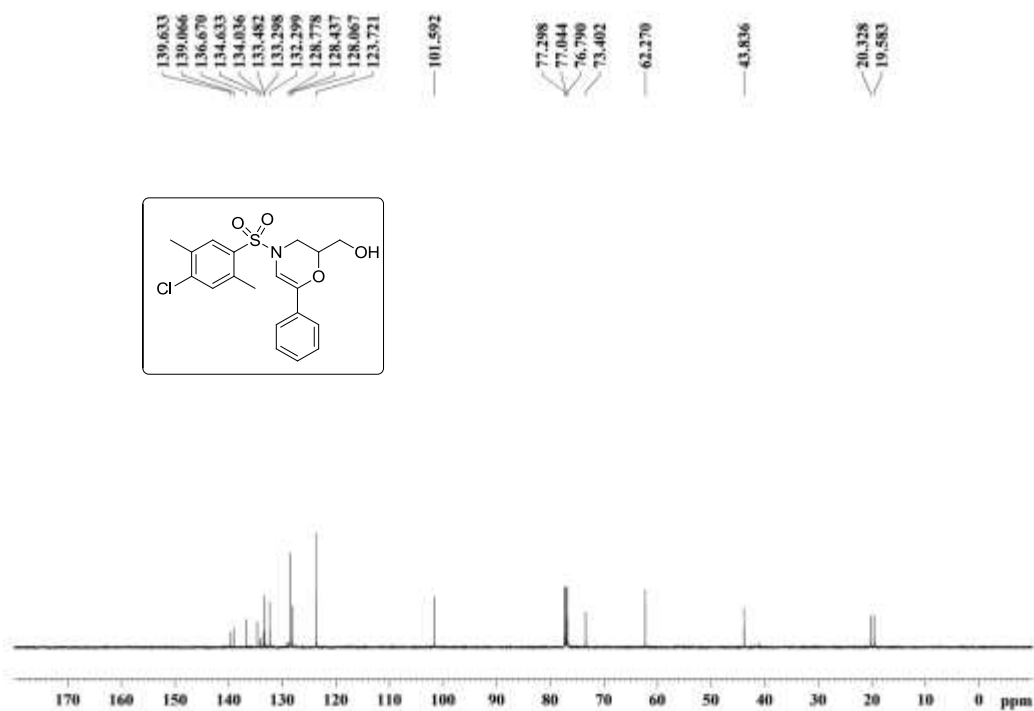

**Figure S66.** <sup>13</sup>C NMR spectrum of compound 24

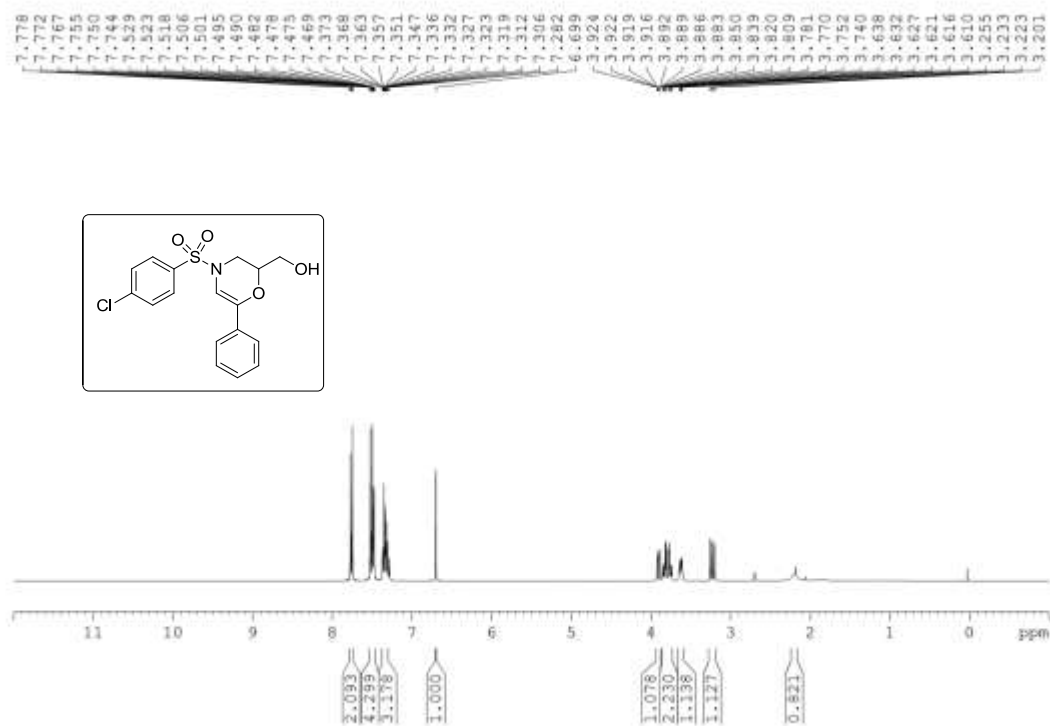

**Figure S67.** <sup>1</sup>H NMR spectrum of compound **25**

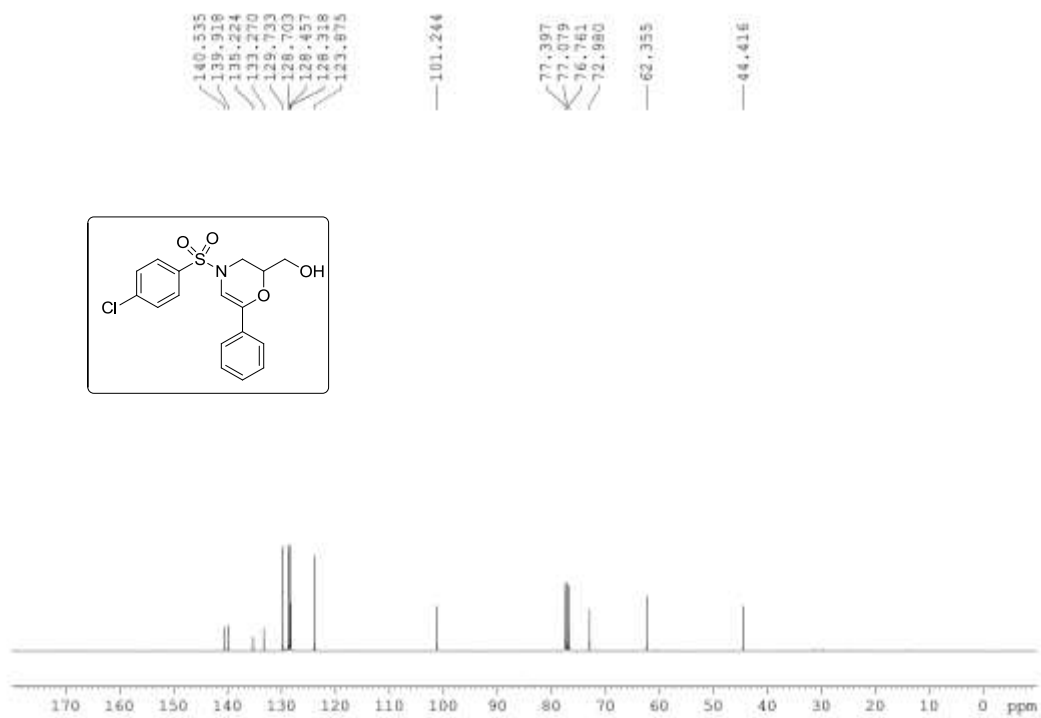

**Figure S68.** <sup>13</sup>C NMR spectrum of compound **25**

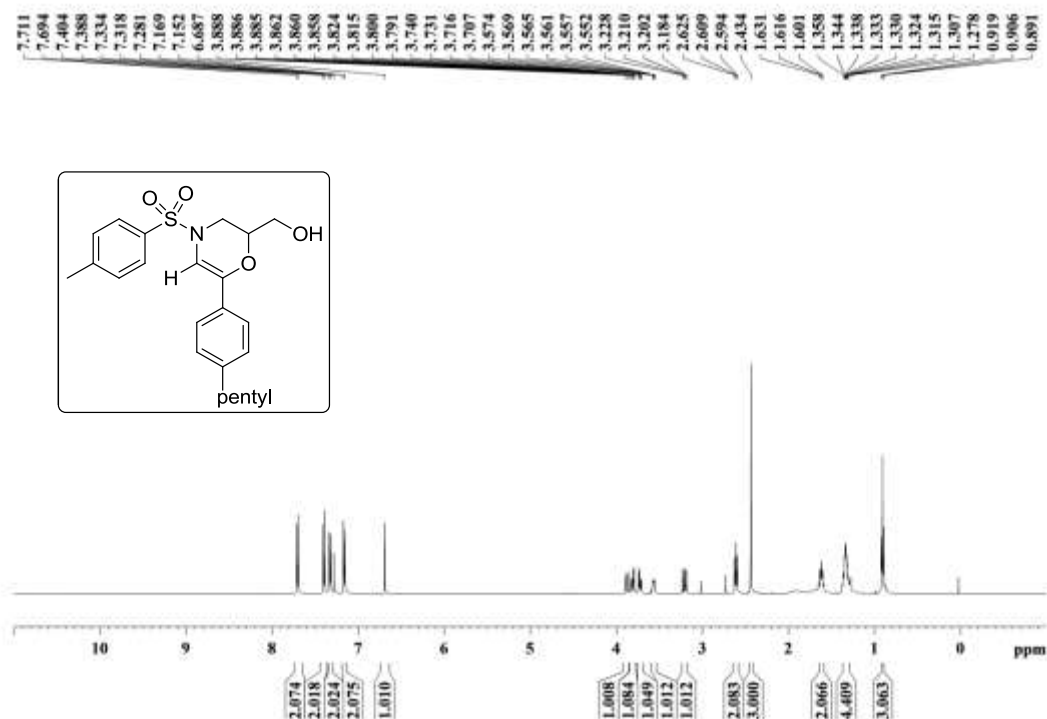

**Figure S69.** <sup>1</sup>H NMR spectrum of compound 26

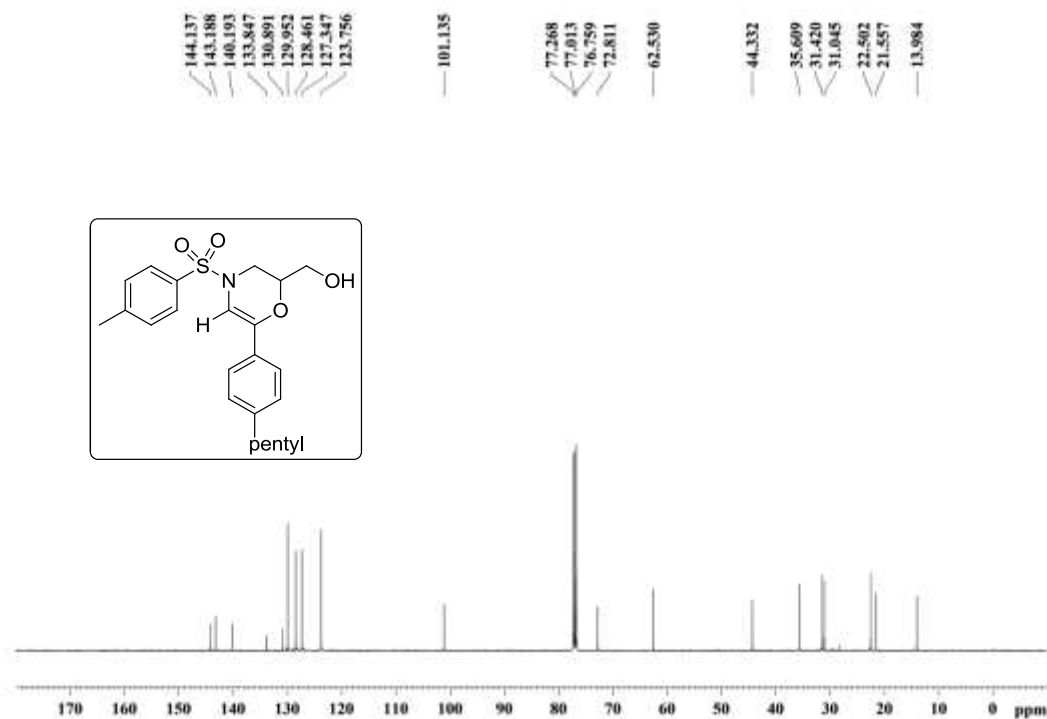

**Figure S70.** <sup>13</sup>C NMR spectrum of compound 26

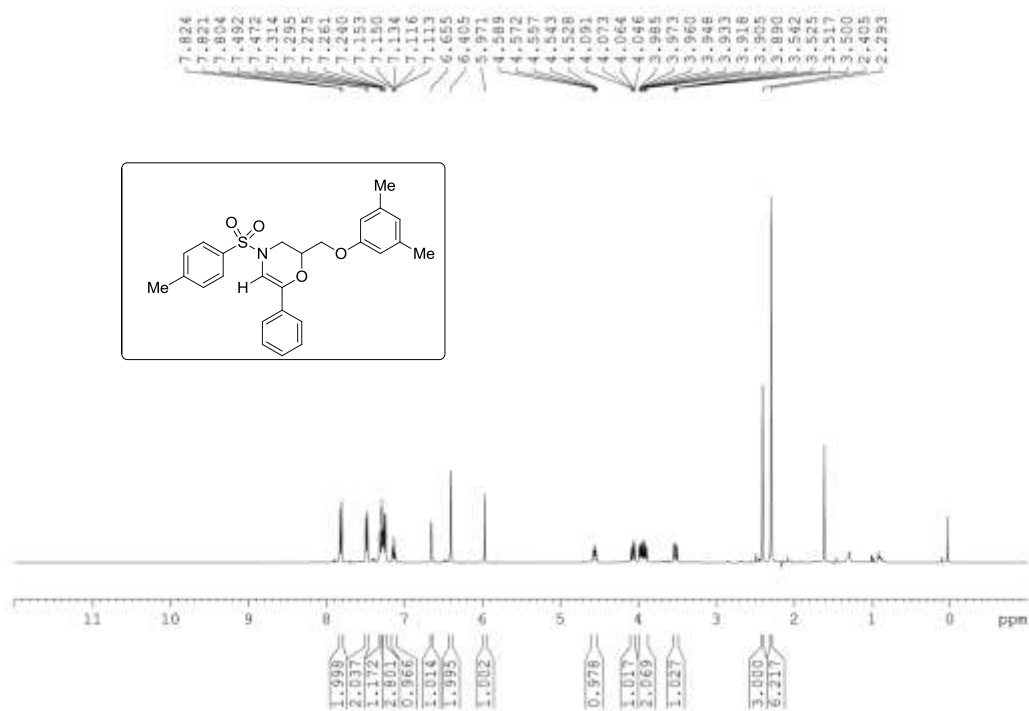

**Figure S71.** <sup>1</sup>H NMR spectrum of compound **27**

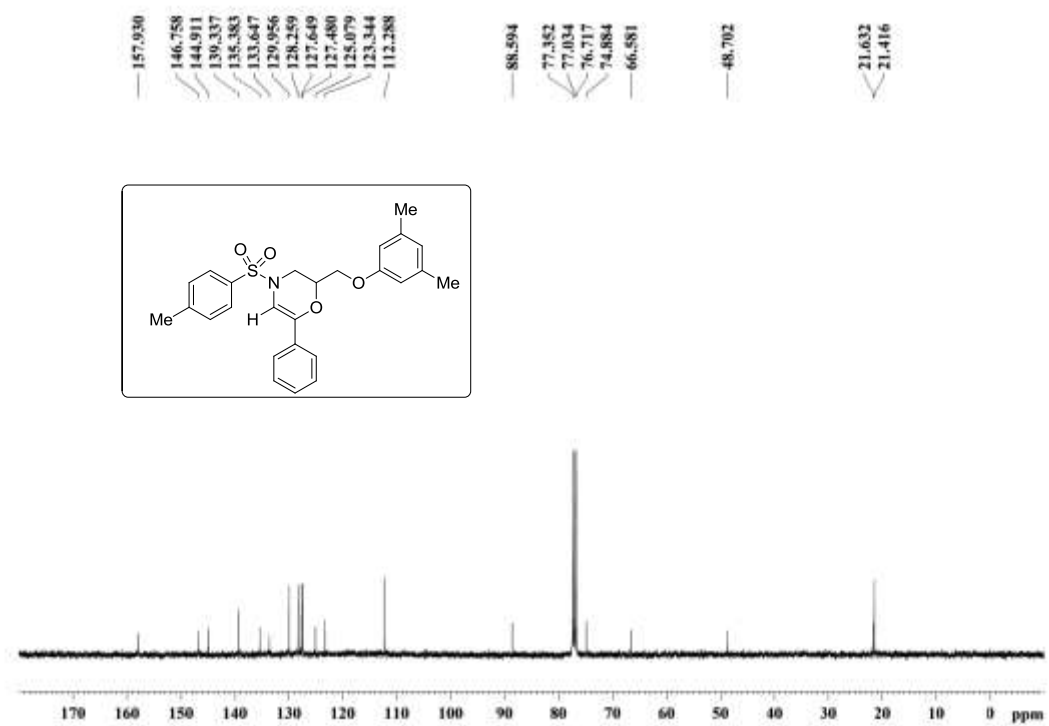

**Figure S72.** <sup>13</sup>C NMR spectrum of compound **27**

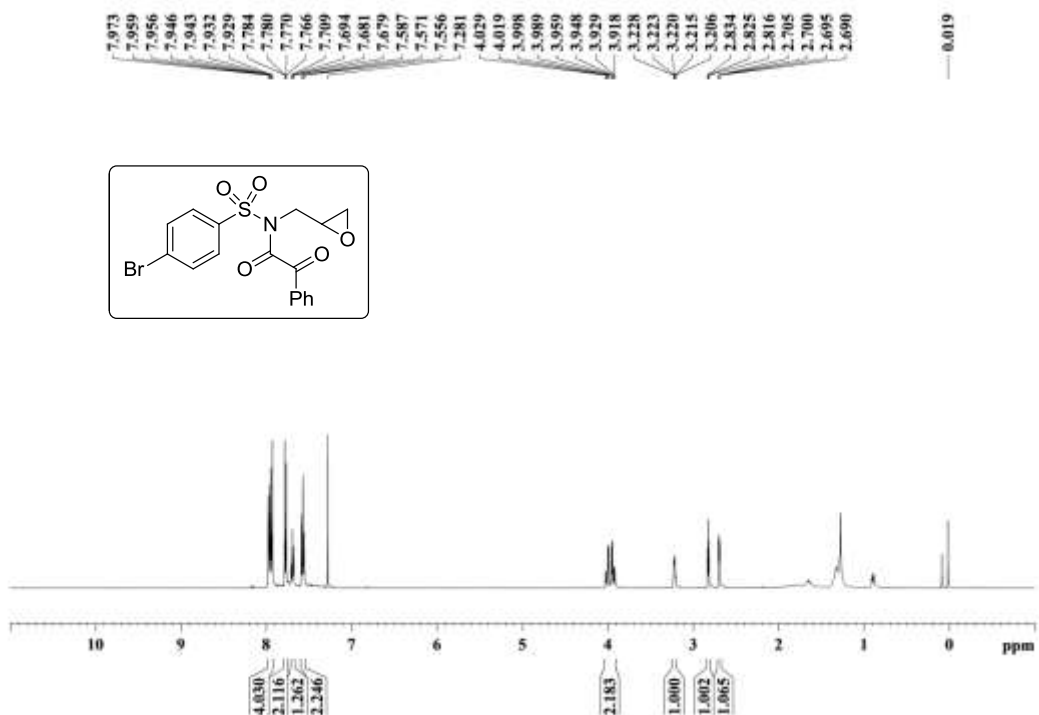

Figure S73. <sup>1</sup>H NMR spectrum of compound 28

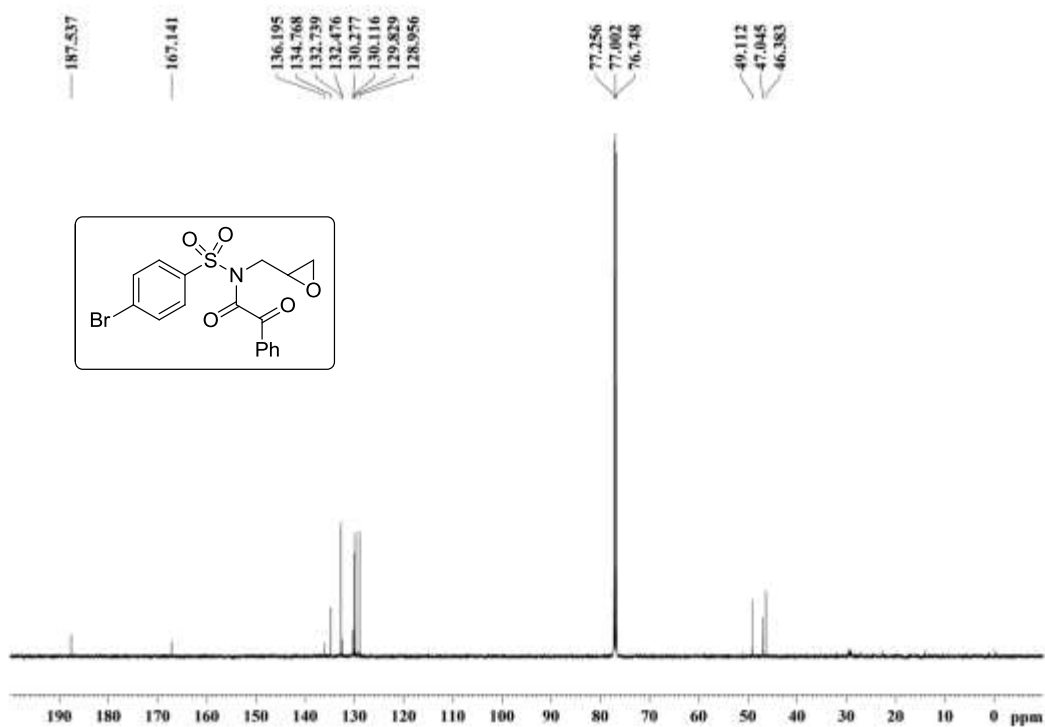

Figure S74. <sup>13</sup>C NMR spectrum of compound 28

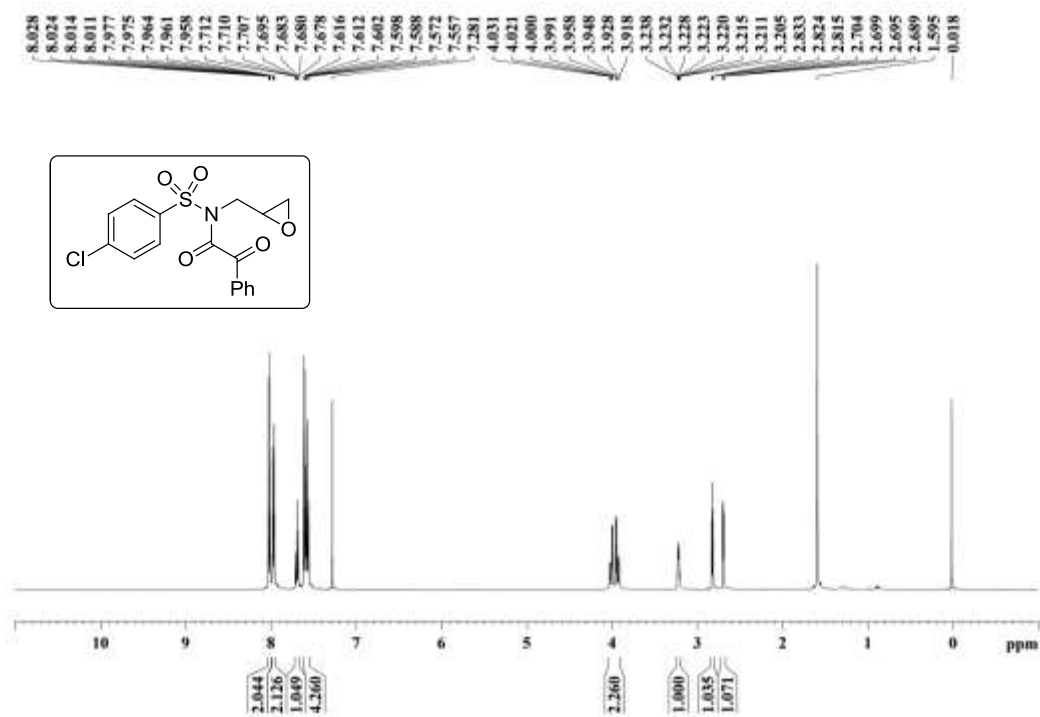

Figure S75. <sup>1</sup>H NMR spectrum of compound 29

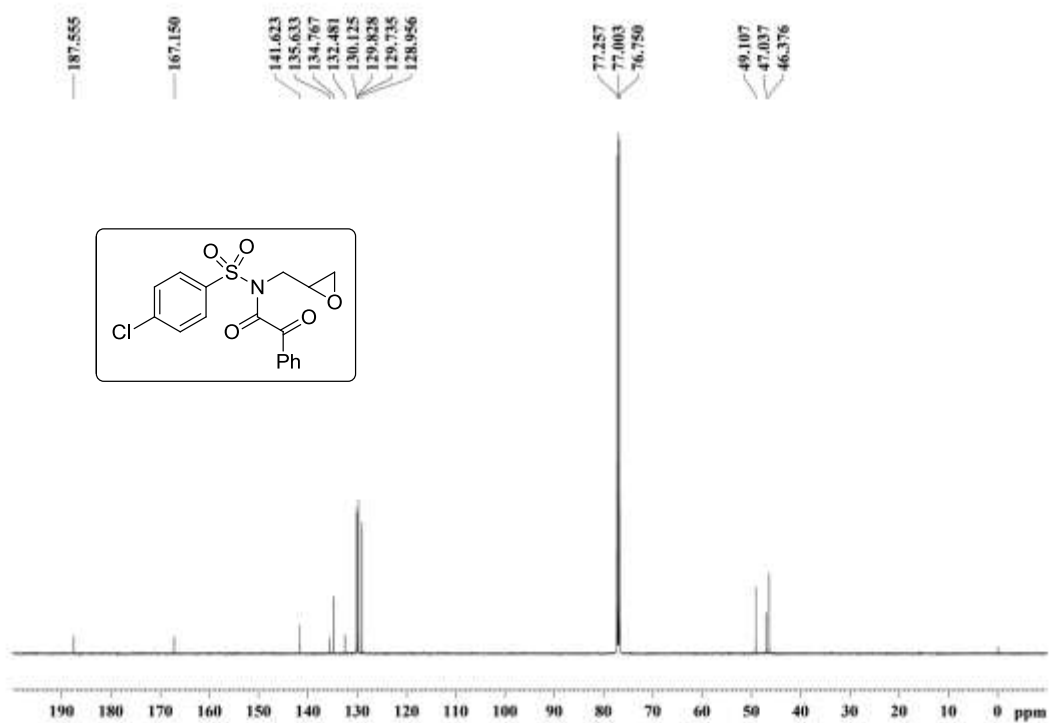

Figure S76. <sup>13</sup>C NMR spectrum of compound 29

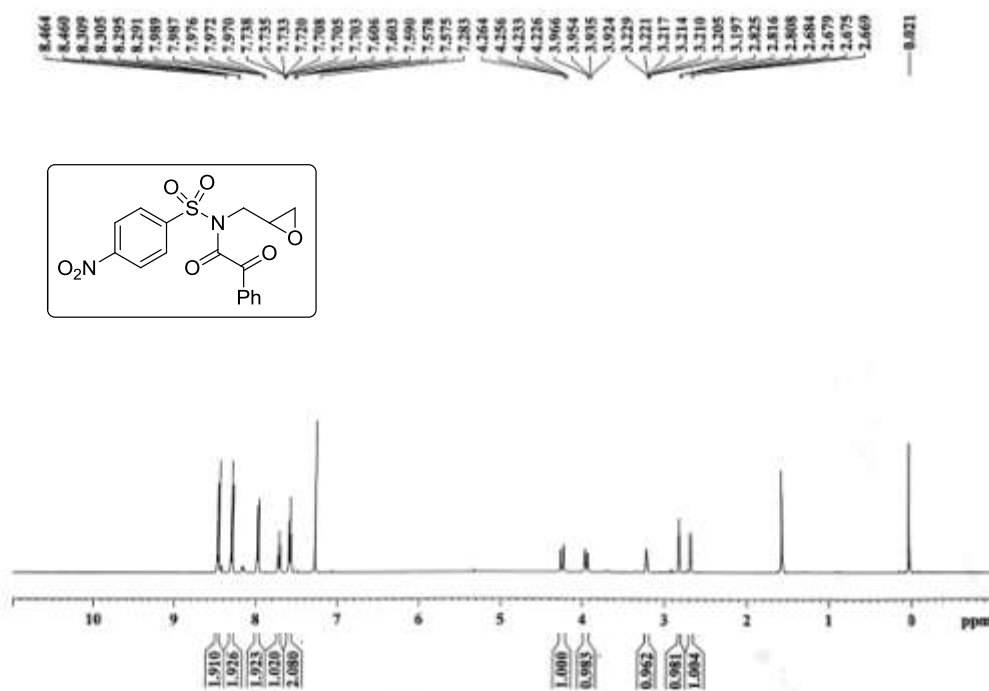

**Figure S77.** <sup>1</sup>H NMR spectrum of compound **30**

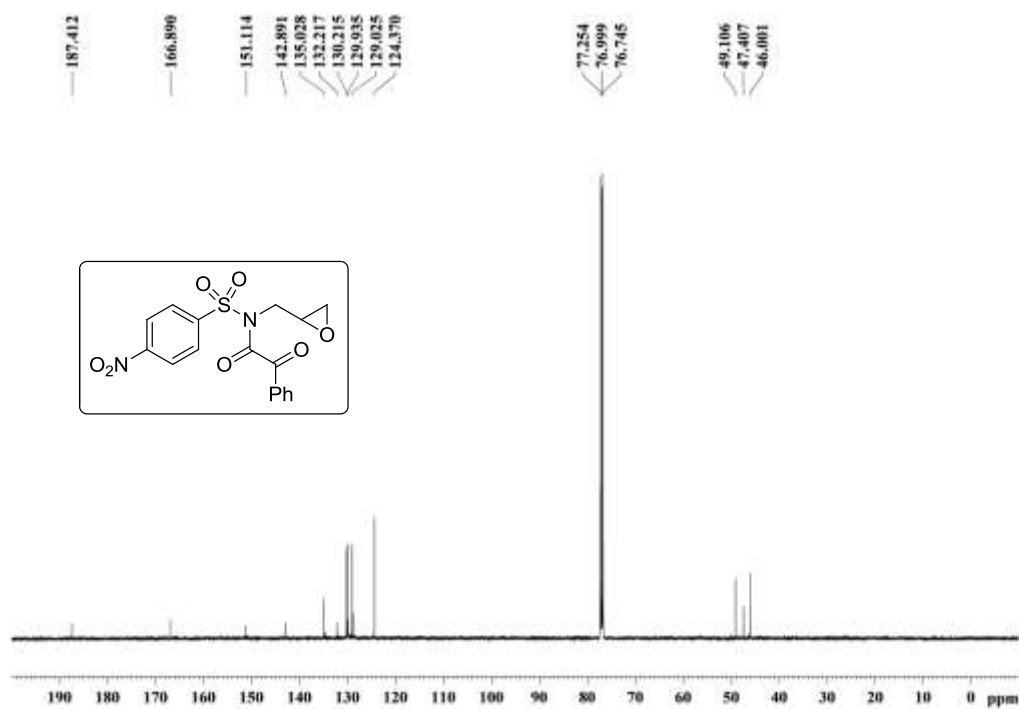

**Figure S78.** <sup>13</sup>C NMR spectrum of compound **29**

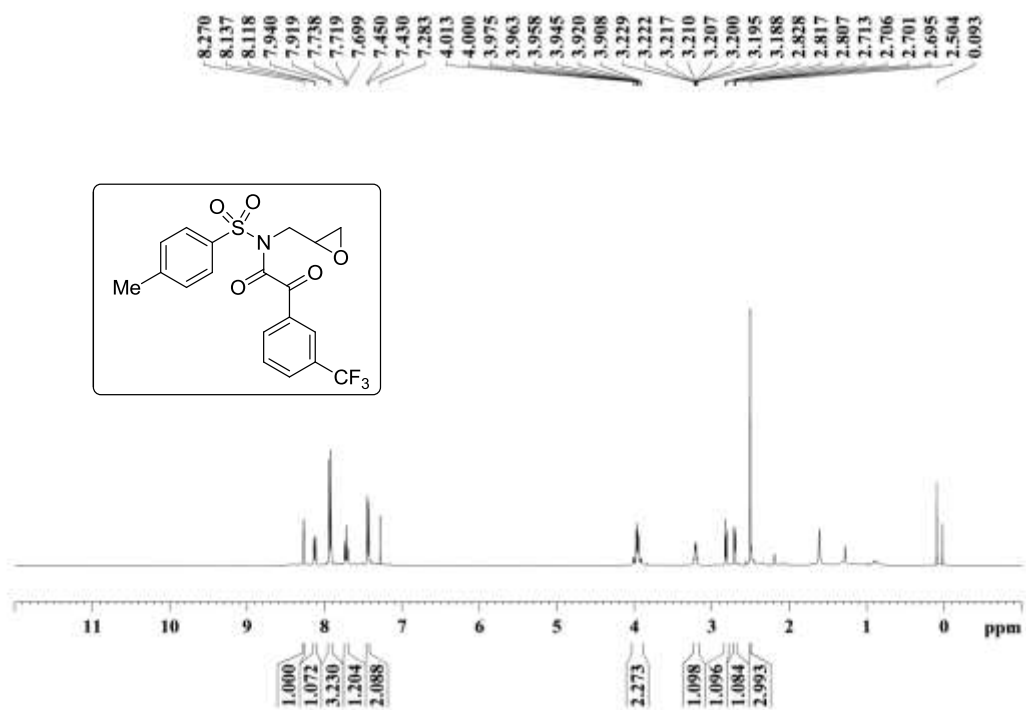

**Figure S79.** <sup>1</sup>H NMR spectrum of compound **31**

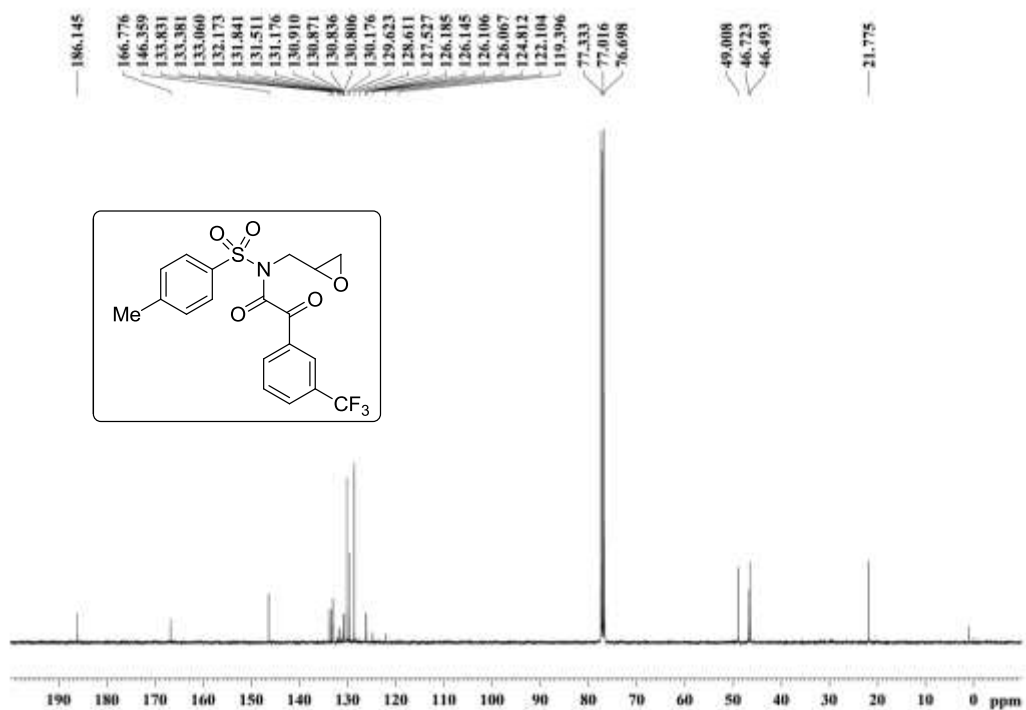

**Figure S80.** <sup>13</sup>C NMR spectrum of compound **31**

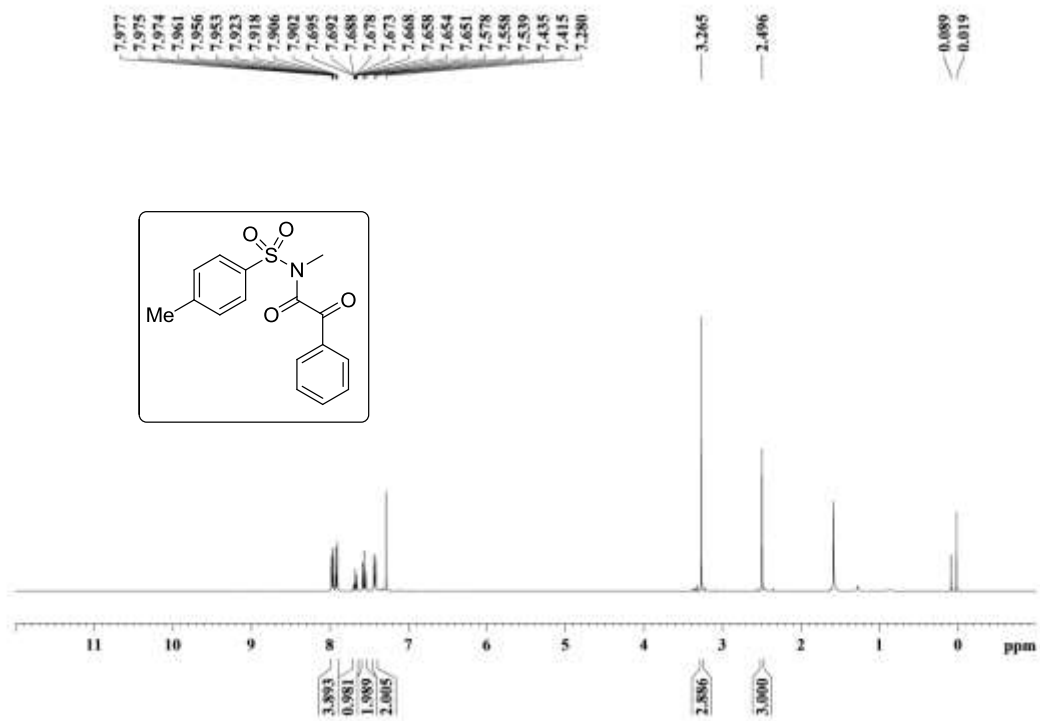

**Figure S81.** <sup>1</sup>H NMR spectrum of compound **33**

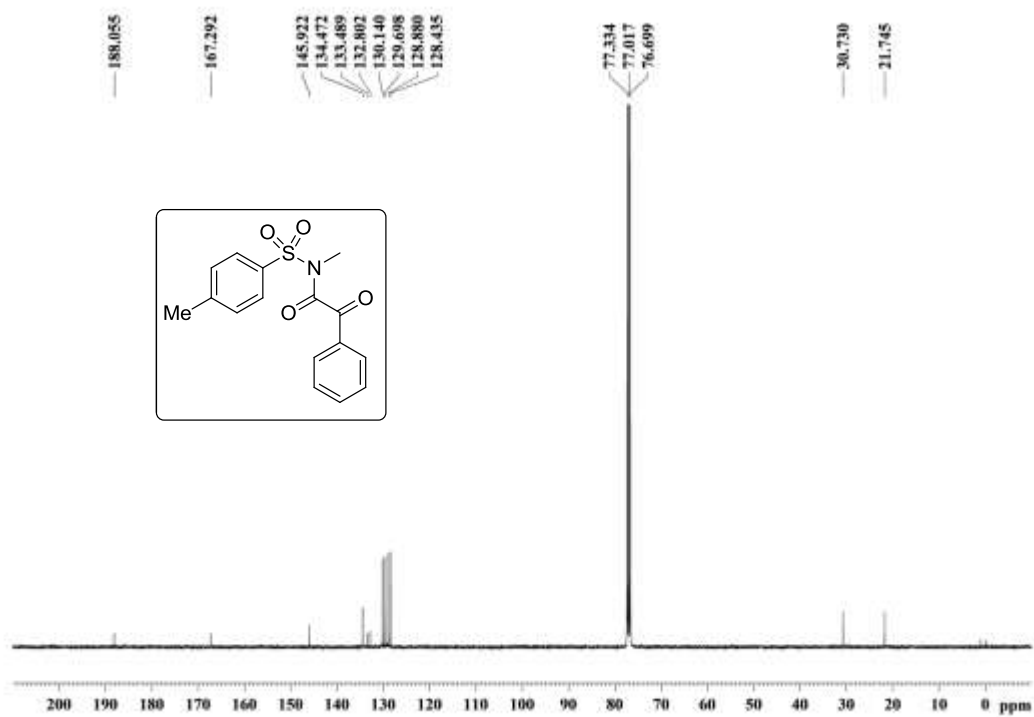

**Figure S82.** <sup>13</sup>C NMR spectrum of compound **33**

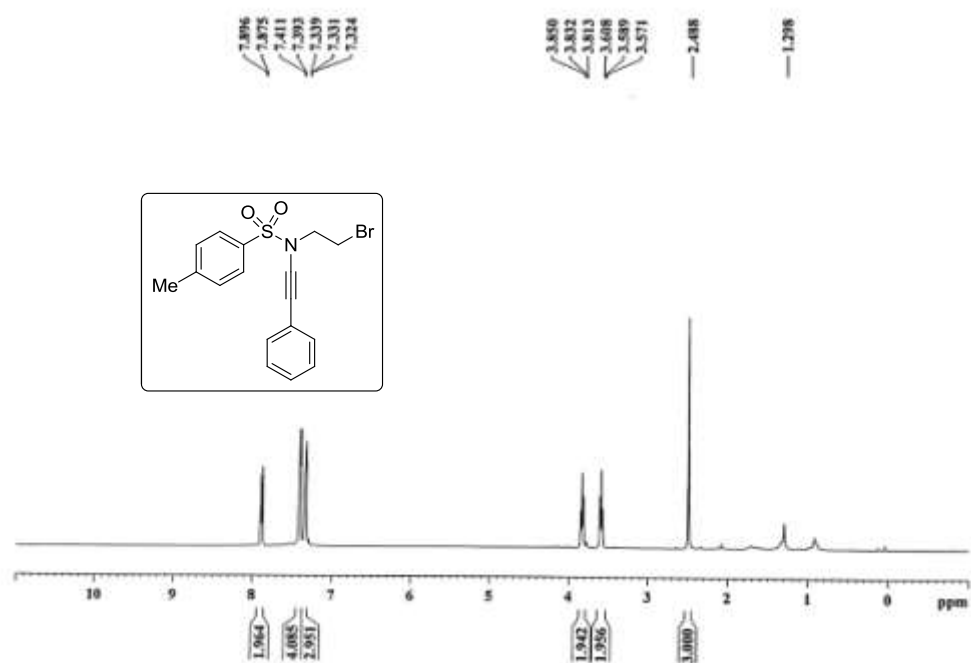

**Figure S83.** <sup>1</sup>H NMR spectrum of compound **34**

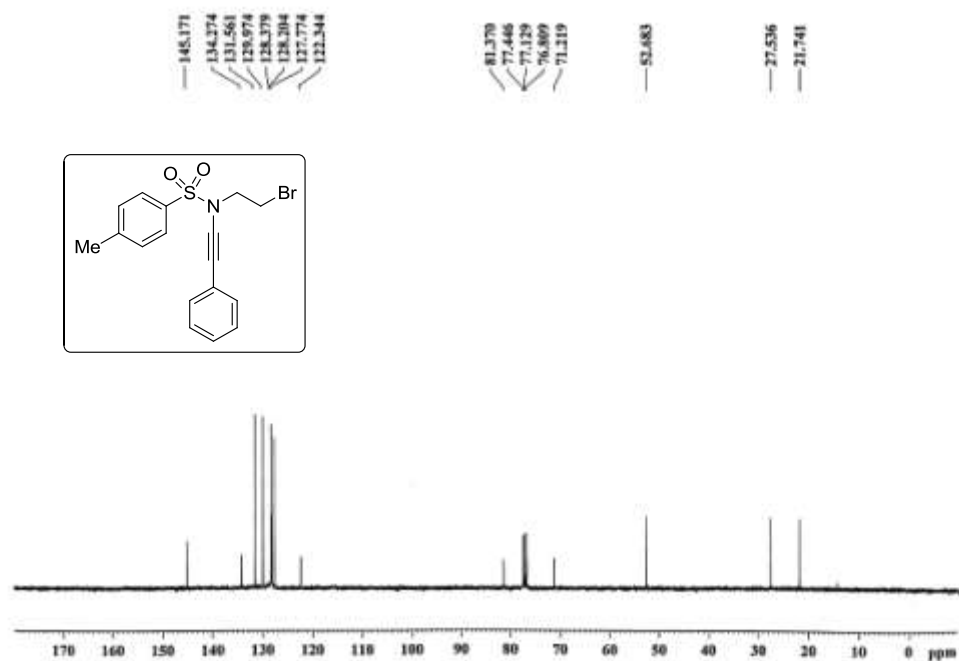

**Figure S84.** <sup>13</sup>C NMR spectrum of compound **34**

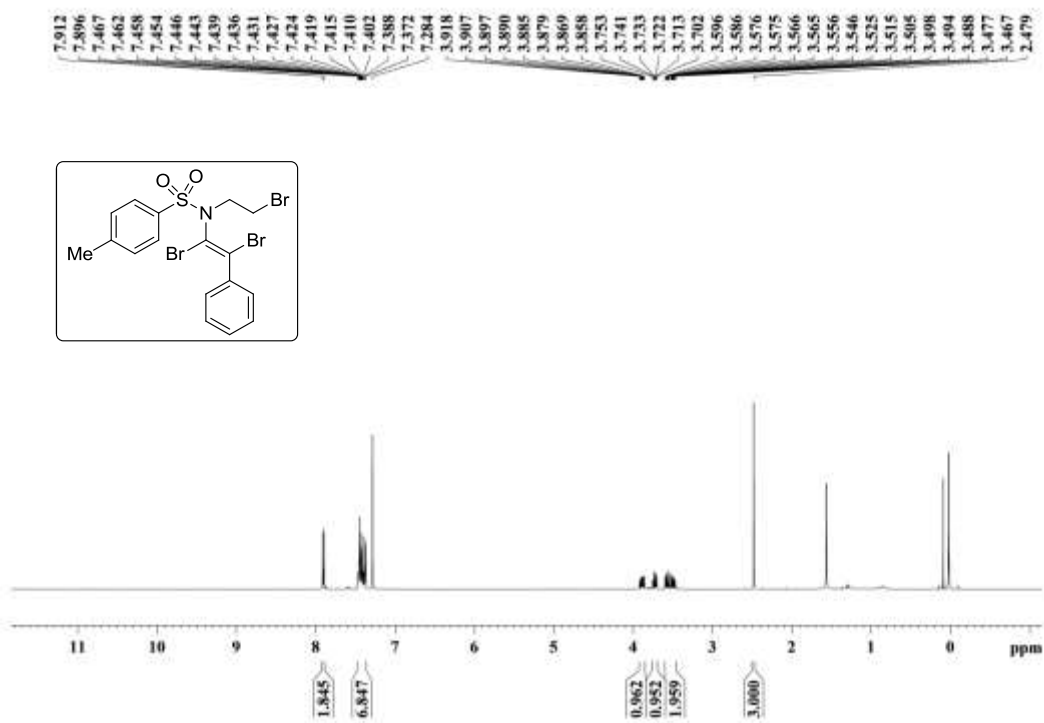

Figure S85. <sup>1</sup>H NMR spectrum of compound 35

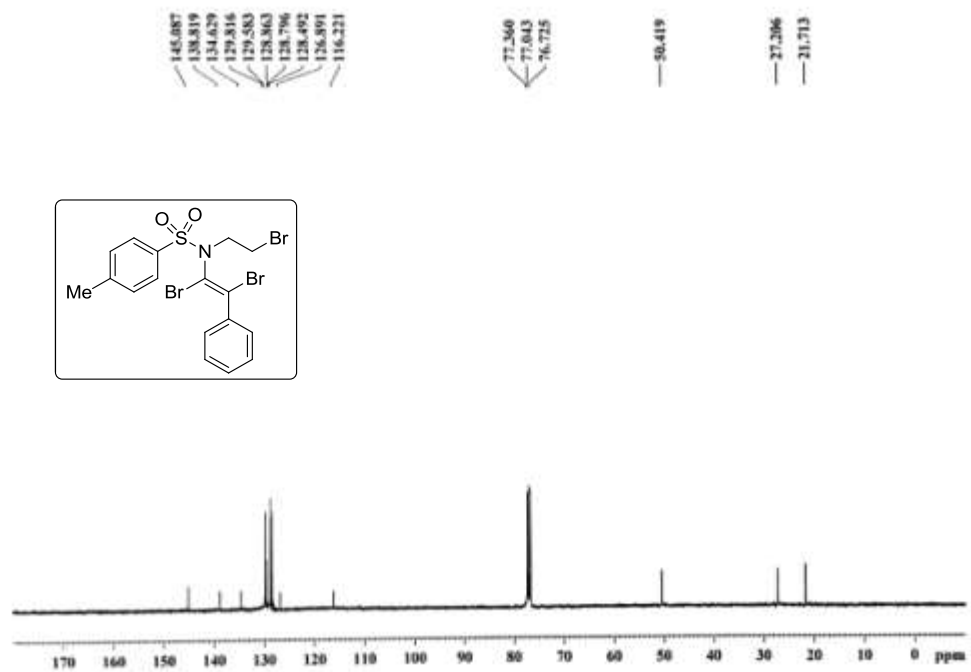

Figure S86. <sup>13</sup>C NMR spectrum of compound 35
